# Supplementary material for: Meridianin G and its analogs as antimalarial agents
Source: Royal Society of Chemistry journal article supplement (doi:10.1039/c3md00097d), 2013-01-01
Supplement: c3md00097d.doc [file c3md00097d.doc]

Electronic Supporting Information (ESI)

Meridianin G and its analogs as antimalarial agents

Sandip B. Bharate,* ac Rammohan R. Yadav,ac Shabana I. Khan,b Babu L. Tekwani,b Melissa R. Jacob,b Ikhlas A. Khan, b Ram A. Vishwakarma*ac

a*Medicinal Chemistry Division, Indian Institute of Integrative Medicine (CSIR), Canal Road, Jammu-180001, India*

b*National Center for Natural Products Research (NCNPR), School of Pharmacy, University of Mississippi, MS 38677, USA*

*c Academy of Scientific and Innovative Research (AcSIR), Anusandhan Bhawan, 2 Rafi Marg, New Delhi – 110001, India*

**E-mail:* [*ram@iiim.ac.in*](mailto:ram@iiim.ac.in)*;* [*sbharate@iiim.ac.in*](mailto:sbharate@iiim.ac.in)

**Table of c**ontents

| **Sr No** | **Contents** | **Page no.** |
| --- | --- | --- |
| **S1** | Experimental section | S3 |
| **S1.1.** | Chemistry protocols | S3 |
| **S2.2.** | Biology protocols | S11 |
| **S2** | Scanned copies of 1H, 13C and DEPT135 NMR spectras of all compounds | S13 |
| **S2.1.** | 1H, 13C and DEPT135 NMR spectraof meridianinC(**3**) | S13 |
| **S2.2.** | 1H, 13C and DEPT135 NMR spectraof meridianin G (**7**) | S15 |
| **S2.3.** | 1H, 13C and DEPT135 NMR spectra of 4-(5-bromo-1-(2-methoxyethyl)-1H-indol-3-yl)pyrimidin-2-amine (**15**) | S17 |
| **S2.4.** | 1H, 13C and DEPT135 NMR spectra of (3-(2-aminopyrimidin-4-yl)-1H-indol-1-yl)(morpholino)methanone (**17a**) | S19 |
| **S2.5** | 1H, 13C and DEPT135 NMR spectra of (3-(2-aminopyrimidin-4-yl)-5-bromo-1H-indol-1-yl)(morpholino)methanone (**17b**) | S21 |
| **S2.6.** | 1H, 13C and DEPT135 NMR spectra of (3-(2-aminopyrimidin-4-yl)-1H-indol-1-yl)(4-methylpiperazin-1-yl)methanone (**17c**) | S23 |
| **S2.7.** | 1H, 13C and DEPT135 NMR spectra of (3-(2-aminopyrimidin-4-yl)-5-bromo-1H-indol-1-yl)(4-methylpiperazin-1-yl)methanone (**17d**) | S25 |
| **S2.8.** | 1H, 13C and DEPT135 NMR spectra of (3-(2-aminopyrimidin-4-yl)-1H-indol-1-yl)(phenyl)methanone (**17e**) | S27 |
| **S2.9.** | 1H, 13C and DEPT135 NMR spectra of (3-(2-aminopyrimidin-4-yl)-5-bromo-1H-indol-1-yl)(phenyl)methanone (**17f**) | S29 |
| **S2.10.** | 1H, 13C and DEPT135 NMR spectra of N-(4-(1H-indol-3-yl)pyrimidin-2-yl)-3-methoxybenzamide (**17g**) | S31 |
| **S2.11.** | 1H, 13C and DEPT135 NMR spectra of (3-(2-aminopyrimidin-4-yl)-1H-indol-1-yl)(2-ethoxyphenyl)methanone (**17h**) | S33 |
| **S2.12.** | 1H, 13C and DEPT135 NMR spectra of 4-(1-((3,5-dimethylisoxazol-4-yl)methyl)-1H-indol-3-yl)pyrimidin-2-amine (**19a**) | S35 |
| **S2.13.** | 1H, 13C and DEPT135 NMR spectra of 4-(5-bromo-1H-indol-3-yl)-N-((3,5-dimethylisoxazol-4-yl)methyl) pyrimidin-2-amine (**19b**) | S37 |
| **S2.14.** | 1H, 13C and DEPT135 NMR spectra of 4-(1-((5-chlorothiophen-2-yl)methyl)-1H-indol-3-yl)pyrimidin-2-amine (**19c**) | S39 |
| **S2.15.** | 1H, 13C and DEPT135 NMR spectra of 4-(5-bromo-1H-indol-3-yl)-N-((5-chlorothiophen-2-yl)methyl)pyrimidin-2-amine (**19d**) | S41 |
| **S2.16.** | 1H, 13C and DEPT135 NMR spectra of 2-((3-(2-aminopyrimidin-4-yl)-5-bromo-1H-indol-1-yl)methyl) isoindoline-1,3-dione (**19e**) | S43 |
| **S2.17.** | 1H, 13C and DEPT135 NMR spectra of 4-(1-(anthracen-10-ylmethyl)-1H-indol-3-yl)pyrimidin-2-amine (**19f**) | S45 |
| **S2.18.** | 1H, 13C and DEPT135 NMR spectra of 4-(1-(anthracen-10-ylmethyl)-5-bromo-1H-indol-3-yl)pyrimidin-2-amine (**19g**) | S47 |
| **S2.19.** | 1H, 13C and DEPT135 NMR spectra of 2-(1H-indol-3-yl)-2,3-dihydroquinazolin-4(1H)-one (**22a**) | S49 |
| **S2.20.** | 1H, 13C and DEPT135 NMR spectra of 2-(5-bromo-1H-indol-3-yl)-2,3-dihydroquinazolin-4(1H)-one (**22b**) | S51 |
| **S2.21.** | 1H, 13C and DEPT135 NMR spectra of 2-(5-iodo-1H-indol-3-yl)quinazolin-4(3H)-one (**22c**) | S53 |
| **S3.** | References associated with ESI | S55 |

**s1. Experimental Section**

S1.1. Chemistry protocols

**General.** All chemicals were obtained from Sigma-Aldrich Company and used as received. 1H, 13C and DEPT NMR spectra were recorded on Brucker-Avance DPX FT-NMR 500 and 400 MHz instruments. Chemical data for protons are reported in parts per million (ppm) downﬁeld from tetramethylsilane and are referenced to the residual proton in the NMR solvent (CDCl3, 7.26 ppm; CD3OD, 3.31 ppm). The carbon nuclear magnetic resonance spectra (13C NMR) were recorded at 125 MHz or 100 MHz: chemical data for carbons are reported in parts per million (ppm, δ scale) downﬁeld from tetramethylsilane and are referenced to the carbon resonance of the solvent (CDCl3, 77.16 ppm; CD3OD, 49.0). ESI-MS and HRMS spectra were recorded on Agilent 1100 LC-Q-TOF and HRMS-6540-UHD machines. IR spectra were recorded on Perkin-Elmer IR spectrophotometer. Melting points were recorded on digital melting point apparatus.

**Procedure for acetylation of indoles1: Synthesis of 12a-b.** To a solution of indole (**11a**) or 5-bromo-indole (**11b**) in 50 mL of anhydrous toluene at 0 °C was added 2 equiv. acetyl chloride. After stirring for 15 min at 0 °C, a solution of SnCl4(2 equiv) in 24 mL anhydrous toluene was added. The resultant solution was stirred for 2 h at 0 °C and 75 ml of 8% NaHCO3 was added dropwise. Resulted slurry was diluted with 150 mL of ethyl acetate, dried (Na2SO4), and filtered. The solvent was removed with rotary evaporator. The residue was chromatographed on a silica gel column using EtOAc/hexane as eluent to get title products **12a-b**.

**1-(*1H*-Indol-3-yl) ethanone (12a)**. Yield: 95%, brick red solid, m. p. 252-254 °C; 1H NMR (CD3OD, 400 MHz): δ 8.21 (s, 1H), 8.13 (s, 1H), 7.42-7.44 (m, 1H), 7.17-7.24 (m, 2H), 2.51 (s, 3H); HRMS: m/z 160.0774 calcd for C10H9NO + H+ (160.0757).

**1-(5-Bromo-1H-indol-3-yl)ethanone (12b)**. Yield: 84%, brick red solid, m. p. 250-252 °C;  1H NMR (CD3OD, 400 MHz): *δ* 7.2 (d, 1H, *J* = 8.9 Hz), 6.9 (s, 1H), 5.9-6.1 (m, 2H), 2.1 (s, 3H); HRMS: m/z 237.9860 calcd for C10H8NO + H+ (237.9862).

**Procedure for tosylation of 12a-b1: Synthesis of 13a-b**.To the solution of 3-acetyl indole (**12a**) or 5-bromo-3-acetyl indole (**12b**)in dichloromethane was added DMAP (0.05 equiv), p-toluenesulfonyl choride (TsCl, 1.1 equiv)) and *N,N*-diisopropylethylamine (DIPEA, 1.5 equiv). The mixture was stirred at room temperature for 20 h. Reaction was then quenched by the addition of 10% HCl. Dichloromethane was added to the reaction mixture. Organic layer was separated, dried over anhydrous sodium sulphate and concentrated to get crude compound. The residue was chromatographed on a silica gel column using EtOAc/hexane as eluent to get title products **13a-b**.

**1-(1-Tosyl-1H-indol-3-yl)ethanone (13a)**: Yield: 85%, white solid, m. p. 155-157 °C; 1H NMR (CDCl3, 400 MHz): δ 8.2 (s, 1H), 7.93 (t, 1H, *J* = 6.8 Hz), 7.85 (s, 1H), 7.83 (s, 2H), 7.26-7.39 (m, 4H), 2.57 (d, 3H, *J* = 3.6 Hz), 2.37 (d, 3H, *J* = 3.6 Hz); HRMS: *m/z* 314.0827 calcd for C17H15NO3S + H+ (314.0845).

**1-(5-Bromo-1-tosyl-1H-indol-3-yl)ethanone (13b)**:Yield: 72%, white solid, m. p. 140-142 °C; 1H NMR (CDCl3, 400 MHz): δ 8.49-8.53 (m, 1H), 8.17-8.19 (t, 1H, *J* = 4.4 Hz), 7.79 (t, 3H, *J* = 8 Hz), 7.45-7.48 (m, 1H), 7.25-7.30 (m, 2H), 2.49-2.56 (m, 3H), 2.35 (d, 3H, *J* = 4.8 Hz); HRMS: *m/z* 391.9916 calcd for C17H14NO3S + H+ (391.9951).

**Procedure for enaminone synthesis2: Synthesis of 14a-b**

1-(1-Tosyl-*1H*-indol-3-yl)ethanone (**13a**) or 1-(5-bromo-1-tosyl-1H-indol-3-yl)ethanone (**13b**) was taken in dry DMF was added a solution of dimethyl formamide-dimethylacetal (DMF-DMA, 1.5 equiv) in the same solvent (2 mL). The resultant solution was heated at 110 C for 4 h under N2 atmosphere. After cooling, the solution was poured into water and then extracted with EtOAc. The combined organic layers were dried over anhydrous sodium sulphate and concentrated to dryness under reduced pressure. The residue was chromatographed on a silica gel column using EtOAc/hexane as eluent to give title products **14a-b** as yellow solids.

**3-(Dimethylamino)-1-(1-tosyl-1H-indol-3-yl)prop-2-en-1-one** (**14a**): Yield: 55%, pale yellow solid, m. p. 163-165 °C; 1H NMR (CDCl3, 400 MHz): δ 8.3 (s, 1H), 8.1 (s, 1H), 7.90 (d, 1H, *J* = 0.4 Hz), 7.76-7.80 (m, 3H), 7.22-7.34 (m, 4H), 5.6 (d, 3H, *J* = 12.4 Hz), 2.96 (d, 6H, *J* = 10.8 Hz), 2.36 (d, 3H, *J* = 10.0 Hz); HRMS: *m/z* 369.1241 calcd for C20H20N2O3S + H+ (369.1267)

**1-(5-Bromo-1-tosyl-1H-indol-3-yl)-3-(dimethylamino)prop-2-en-1-one** (**14b**):Yield: 50%, pale yellow solid, m. p. 176-178 °C; 1H NMR (CDCl3, 400 MHz): δ 8.6 (s, 1H), 8.0 (s, 1H), 7.7 (m, 4H), 7.4 (t, 1H, *J* = 1.9 Hz), 7.2 (t, 2H, *J* = 4.8 Hz), 5.6 (d, 3H, *J* = 12.3 Hz), 3.1 (s, 3H), 2.9 (s, 3H), 2.4 (s, 3H); HRMS: *m/z* 447.0335 calcd for C20H19BrN2O3S + H+ (447.0373)

**Procedure for aminopyrimidine ring formation3: Synthesis of meridianin C (3) and G (7)**.A mixture of enaminone **14a** or **14b**, guanidine hydrochloride (1.5 equiv), anhydrous K2CO3 (2 equiv) and 2-methoxyethanol was heated at reflux temperature for 24 h under N2 atmosphere. After cooling, the solution was poured into water and then extracted with EtOAc. The combined organic layers were dried (Na2SO4) and concentrated to dryness under reduced pressure. The residue was chromatographed on a silica gel column using DCM/methanol as eluent to give title product **3** or **7** as pale yellow solids. The side product **15** was also formed during synthesis of meridianin C (**3**).

**Meridianin C (3):** Yield: 55%; pale yellow solid; m. p. 104-107 °C; 1H NMR (DMSO-d6, 400 MHz): δ 11.86 (brs, 1H, NH), 8.76 (d, 1H, *J* = 2.0 Hz), 8.26 (d, 1H, *J* = 2.8 Hz), 8.11 (d, 1H, *J* = 5.6 Hz ), 7.42 (d, 1H, *J* = 8.8 Hz), 7.30 (dd, 1H, *J* = 2.0, 7.2 Hz), 7.01 (d, 1H, *J* = 5.6 Hz ), 6.49 (s, 2H, NH2); 13C NMR (Acetone-d6, 125 MHz): 164.85, 163.63, 158.20, 137.00, 129.69, 128.39, 125.87, 125.84, 115.11, 114.51, 114.35, 106.59; IR (Neat): νmax 3400, 2921, 1580, 1450, 1022 cm-1; HRMS: *m/z* 289.0081 calcd for C12H9BrN4 + H+ (289.0083).4

**Meridianin G (7):** Yield: 66%; m. p. 185-187 °C; pale yellow solid; 1H NMR (CD3OD, 400 MHz): δ 8.40-8.30 (m, 1H), 8.00 (d, 1H, *J* = 5.6 Hz), 7.93 (s, 1H), 7.35-7.31 (m, 1H), 7.12-7.05 (m, 2H), 6.96 (d, 1H, *J* = 5.6 Hz); 13C NMR (CD3OD, 125 MHz): 164.83, 163.66, 157.03, 138.24, 128.62, 126.05, 123.10, 121.88, 121.59, 114.78, 112.54, 107.59; IR (Neat): νmax 3176, 2920, 1573, 1533, 1454, 1325, 1245, 1219, 1183 cm-1; HRMS: *m/z* 211.0989 calcd for C12H10N4 + H+ (211.0978).5

**4-(5-Bromo-1-(2-methoxyethyl)-1H-indol-3-yl)pyrimidin-2-amine (15):** Yield: 35%; brown solid; m. p. 119-121 °C; 1H NMR (CDCl3, 400 MHz): δ 8.60 (d, 1H, *J* = 1.6 Hz), 8.20 (d, 1H, *J* = 5.6 Hz), 7.83 (s, 1H), 7.38-7.36 (m, 1H), 7.26-7.24 (m, 1H), 6.91 (d, 1H, *J* = 5.2 Hz), 5.19 (s, 2H), 4.32 (t, 2H, *J* = 5.2 Hz), 3.74 (t, 2H, *J* = 5.2 Hz), 3.31 (s, 3H); 13C NMR (CDCl3, 100 MHz): 165.44, 163.67, 159.20, 137.73, 134.75, 129.24, 126.51, 126.45, 115.50, 114.48, 114.37, 107.06, 72.49, 60.01, 47.92; IR (CHCl3): νmax 3307, 3203, 2955, 2925, 2856, 1740, 1576, 1536, 1458, 1398, 1343, 1211, 1185, 1099, 1014 cm-1; HRMS: *m/z* 347.0474 calcd for C15H15BrN4O + H+ (347.0502).

**General procedure for synthesis of *NH*-substituted meridinain analogs** **17a-h and 19a-g**. To a solution of meridianin G (**7**) or meridianin C (**3**) in acetonitrile, anhydrous potassium carbonate (2 equiv) and aryl acid chloride/ aryl alkyl halide (1 equiv) was added. The resultant mixture was allowed to stir for 12 h. After completion of the reaction, solvent was evaporated, extracted with ethyl acetate, and dried over Na2SO4, purified bycolumn chromatography (#100-200) using dichloromethane and methanol (99:1 to 97:3) to get the title products **17a-h** or **19a-g**.

**(3-(2-Aminopyrimidin-4-yl)-1H-indol-1-yl)(morpholino) methanone (17a):** Yield: 83%; pale yellow solid; m. p. 188-190 °C; 1H NMR (CD3OD, 400 MHz): δ 8.43 (d, 1H,  *J* = 7.6 Hz), 8.09 (t, 2H,  *J* = 3.6 Hz), 7.58 (d, 1H, *J* = 8.4 Hz), 7.29-7.19 (m, 2H), 7.03 (d, 1H, *J* = 5.2 Hz), 3.61 (d, 4H, *J* = 5.2 Hz), 3.55-3.53 (t, 4H, *J* = 4.8 Hz); 13C NMR (CD3OD, 100 MHz): 164.78, 163.95, 158.40, 154.83, 137.70, 129.53, 128.10, 125.52, 124.02, 123.73, 118.96, 114.10, 108.21, 67.65, 48.12; IR (Neat): νmax 3351, 2920, 2355, 2347, 2325, 1685, 1575, 1452, 1420, 1306, 1273, 1236, 1203, 1114, 1018 cm-1; HRMS: *m/z* 324.1461 calcd for C12H17N5O2 + H+ (324.1455).

**(3-(2-Aminopyrimidin-4-yl)-5-bromo-1H-indol-1-yl)(morpholino) methanone (17b):** Yield: 87%; yellow solid; m. p. 244-246 °C; 1H NMR (DMSO-*d*6, 400 MHz): δ 8.86 (s, 1H), 8.44 (d, 1H, *J* = 1.6 Hz), 8.21-8.19 (m, 1H), 7.65-7.63 (m, 1H), 7.48-7.46 (t, 1H, *J* = 6.8 Hz), 7.14-7.12 (m, 1H), 6.71 (s, 1H), 5.72 (d, 1H, *J* = 2.0 Hz), 3.77 (s, 4H), 3.70 (s, 4H); 13C NMR (CD3OD + CDCl3, 125 MHz): δ 162.35, 157.09, 156.14, 135.45, 131.47, 127.96, 127.05, 124.93, 123.92, 114.25, 114.03, 110.89, 106.40, 70.48, 46.99; IR (CHCl3): νmax 3306, 2955, 2925, 2858, 1739, 1688, 1578, 1544, 1491, 1449, 1419, 1401, 1362, 1342, 1273, 1248, 1082, 1015 cm-1;HRMS: *m/z* 402.0555 calcd for C17H16BrN5O2 + H+ (402.0560).

**(3-(2-Aminopyrimidin-4-yl)-1H-indol-1-yl)(4-methylpiperazin-1-yl)methanone (17c):** Yield: 89%; yellow solid; m. p. 195-197 °C; 1H NMR (CDCl3, 400 MHz): δ 8.38 (t, 1H, *J* = 7.6 Hz), 8.30 (d, 1H, *J* = 5.6 Hz), 7.97 (s, 1H), 7.66 (d, 1H, *J* = 7.6 Hz), 7.39 (m, 2H), 7.02 (t, 1H, *J* = 5.6 Hz), 5.06 (s, 2H, NH2), 3.65 (t, 4H, *J* = 4.8 Hz), 2.52 (t, 4H, *J* = 4.8 Hz ), 2.35 (s, 3H); 13C NMR (CDCl3, 125 MHz): 162.08, 160.81, 157.09, 153.24, 135.14, 126.74, 125.72, 123.23, 121.77, 121.33, 116.91, 112.18, 107.13, 53.75, 46.21, 45.06; IR (CHCl3): νmax 3341, 3210, 2955, 2924, 2854, 2802, 1684, 1623, 1574, 1545, 1454, 1421, 1330, 1294, 1263, 1248, 1153, 1082, 1050, 1018, 1001 cm-1; HRMS: *m/z* 337.1773 calcd for C18H20N6O + H+ (337.1771).

**(3-(2-Aminopyrimidin-4-yl)-5-bromo-1H-indol-1-yl)(4-methylpiperazin-1-yl)methanone (17d):** Yield: 81%; pale yellow solid; m. p. 110-112 °C; 1H NMR (CDCl3, 400 MHz): δ 8.60 (d, 1H, *J* = 2.0 Hz), 8.31 (d, 1H, *J* = 5.6 Hz), 7.93 (s, 1H), 7.55-7.52 (t, 1H, *J* = 8.8 Hz), 7.48-7.45 (m, 1H), 6.95 (d, 1H, *J* = 5.2 Hz), 5.09 (s, 2H, NH2), 3.64 (t, 4H, *J* = 4.4 Hz), 2.52 (t, 4H, *J* = 4.8 Hz), 2.35 (s, 3H); 13C NMR (CDCl3, 100 MHz): 163.14, 161.34, 158.26, 152.84, 134.93, 128.39, 127.43, 125.05, 117.37, 116.48, 114.58, 107.89, 100.4, 54.76, 46.71, 46.01; IR (CHCl3): νmax 3339, 2955, 2924, 2853, 2798, 1686, 1577, 1543, 1448, 1420, 1338, 1292, 1256, 1193, 1018 cm-1; HRMS: *m/z* 415.0854 calcd for C18H19BrN6O + H+ (415.0876).

**(3-(2-Aminopyrimidin-4-yl)-1H-indol-1-yl)(phenyl)methanone (17e):** Yield: 67%; pale yellow solid; m. p. 242-244 °C; 1H NMR (Acetone-*d*6, 400 MHz): δ 8.66 (d, 1H, *J* = 7.6 Hz), 8.39 (d, 1H, *J* = 8.4 Hz), 8.23 (d, 1H, *J* = 5.2 Hz), 8.14 (s, 1H), 7.90-7.88 (t, 2H, *J* = 6.8 Hz), 7.77-7.73 (m, 1H), 7.68-7.64 (t, 2H, *J* = 7.6 Hz), 7.48-7.39 (m, 2H), 7.09 (d, 1H, *J* = 5.2 Hz), 6.11 (s, 2H, NH2); 13C NMR (CDCl3, 100 MHz): 168.62, 162.98, 161.67, 157.67, 137.08, 133.98, 132.45, 129.90, 129.37, 128.86, 128.73, 128.35, 128.01, 125.68, 124.70, 121.67, 120.08, 116.47, 108.38; IR (CHCl3): νmax 3307, 2955, 2924, 2857, 1695, 1571, 1450, 1400, 1360, 1330, 1275, 1235, 1201, 1082, 1015 cm-1; HRMS: *m/z* 315.1236 calcd for C19H14N4O + H+ (315.1240).

**(3-(2-Aminopyrimidin-4-yl)-5-bromo-1H-indol-1-yl)(phenyl)methanone (17f):** Yield: 62%; pale yellow solid; m. p. 205-207 °C; 1H NMR (Acetone-*d*6, 400 MHz): δ 8.92 (d, 1H, *J* = 2.0 Hz), 8.31 (d, 1H, *J* = 8.8 Hz), 8.22-8.21 (t, 2H, J=2.0 Hz), 7.92-7.89 (m, 2H), 7.78-7.74 (m, 1H), 7.68-7.67 (m, 2H), 7.61-7.59 (m, 1H), 7.08 (d, 1H, *J* = 5.2 Hz), 6.23 (s, 2H-NH2 ); 13C NMR (125 MHz, DMSO) δ 168.14, 163.49, 159.93, 158.09, 135.14, 133.04, 132.62, 130.40, 129.66, 129.49, 128.79, 127.85, 125.04, 118.17, 117.40, 116.98, 105.91; IR (CHCl3): νmax 3391, 2955, 2924, 2857, 1693, 1579, 1445, 1362, 1345, 1263, 1193, 1020 cm-1; HRMS: *m/z* 393.0325 calcd for C19H13BrN4O + H+ (393.0346).

**N-(4-(1H-Indol-3-yl)pyrimidin-2-yl)-3-methoxybenzamide (17g):** Yield: 77%; pale yellow solid; m. p. 213-215 °C; 1H NMR (DMSO-*d*6, 500 MHz): δ 8.67 (d, 1H, *J* = 7.6 Hz), 8.31 (d, 1H, *J* = 8.1 Hz), 8.21 (d, 1H, *J* = 5.2 Hz), 8.14 (s, 1H), 7.56 (m, 1H), 7.47 (m, 4H), 7.44 (d, 1H, *J* = 7.7 Hz), 7.38-7.36 (t, 1H, *J* = 6.9 Hz), 6.67 (s, 2H, NH2 ), 3.85 (s, 3H); 13C NMR (DMSO-*d*6, 100 MHz): δ 168.62, 163.98, 160.77, 159.73, 158.73, 136.83, 135.35, 130.59, 129.54, 128.39, 125.75, 124.83, 123.19, 121.79, 119.72, 118.77, 116.19, 114.70, 107.16, 55.96; IR (CHCl3): νmax 3391, 2955, 2924, 2855, 1736, 1692, 1577, 1450, 1384, 1361, 1329, 1277, 1200, 1152, 1020 cm-1; HRMS: *m/z* 345.1327 calcd for C20H16N4O2 + H+ (345.1346).

**(3-(2-Aminopyrimidin-4-yl)-1H-indol-1-yl)(2-ethoxyphenyl)methanone (17h):** Yield: 76%; pale yellow solid; m. p. 186-188 °C; 1H NMR (DMSO-*d*6, 400 MHz): δ 8.65-8.63 (m, 1H), 8.29 (d, 1H, *J* = 7.2 Hz), 8.20 (d, 1H, *J* = 5.2 Hz), 7.91 (s, 1H), 7.66-7.60 (m, 2H), 7.46-7.39 (m, 2H), 7.26 (d, 1H, *J* = 8.4 Hz), 7.19-7.15 (t, 1H, *J* = 7.6 Hz), 7.07 (d, 1H, *J* = 5.2 Hz), 6.67 (s, 2H-NH2 ), 4.10-4.05 (m, 2H), 1.03-0.99 (t, 3H, *J* = 6.8 Hz); 13C NMR (DMSO-*d*6, 100 MHz): δ 167.01, 163.47, 160.17, 158.17, 155.21, 135.68, 132.92, 129.40, 128.74, 127.90, 125.21, 124.21, 123.54, 122.62, 120.81, 119.31, 115.39, 113.18, 106.38, 63.78, 14.09; IR (CHCl3): νmax 3325, 2955, 2925, 2857, 1696, 1599, 1571, 1548, 1450, 1359, 1333, 1292, 1250, 1227, 1201, 1150, 1115, 1041 cm-1; HRMS: *m/z* 359.1480 calcd for C21H18N4O2 + H+ (359.1503).

**4-(1-((3,5-Dimethylisoxazol-4-yl)methyl)-1H-indol-3-yl)pyrimidin-2-amine (19a):** Yield: 64%; pale yellow solid; m. p. 183-185 °C; 1H NMR (CD3OD, 400 MHz): δ 8.47-8.45 (t, 1H, *J* = 7.6 Hz), 8.11 (d, 1H, *J* = 5.6 Hz), 7.97 (s, 1H), 7.44 (d, 1H, *J* = 7.6 Hz), 7.29-7.21 (m, 2H), 7.05 (d, 1H, *J* = 5.2 Hz), 5.27 (s, 2H), 2.37-2.33 (t, 3H, *J* = 7.6 Hz), 2.01 (d, 3H, *J* = 9.2 Hz); 13C NMR (CD3OD, 100 MHz): 168.78, 164.83, 164.64, 160.79, 157.78, 138.79, 131.65, 127.58, 123.96, 123.44, 122.55, 115.38, 111.33, 111.12, 107.60, 40.03, 10.86, 10.11; IR (CHCl3): νmax 3307, 2956, 2925, 2855, 1739, 1575, 1537, 1455, 1393, 1343, 1248, 1193, 1082, 1015 cm-1; HRMS: *m/z* 320.1508 calcd for C18H17N5O + H+ (320.1506).

**4-(5-Bromo-1H-indol-3-yl)-N-((3,5-dimethylisoxazol-4-yl)methyl) pyrimidin-2-amine (19b):** Yield: 85%; yellow solid; m. p. 172-174 °C; 1H NMR (CDCl3, 400 MHz): δ 8.59 (d, 1H, *J* = 2.0 Hz), 8.24 (d, 1H, *J* = 5.2 Hz), 7.58 (s, 1H), 7.42-7.39 (m, 1H), 7.23 (d, 1H, *J* = 8.8 Hz), 6.88 (d, 1H, *J* = 5.2 Hz), 5.05 (s, 4H, CH2 and NH2 ), 2.35 (s, 3H), 2.08 (s, 3H); 13C NMR (125 MHz, CDCl3) δ 167.24, 162.56, 161.23, 159.07, 157.59, 135.80, 129.12, 127.65, 125.92, 124.77, 115.06, 114.39, 110.81, 108.66, 107.14, 39.39, 11.17, 10.21; IR (CHCl3): νmax 3326, 2955, 2924, 2854, 1727, 1576, 1537, 1458, 1392, 1191, 1020 cm-1; HRMS: *m/z* 398.0588 calcd for C18H16BrN5O + H+ (398.0611).

**4-(1-((5-Chlorothiophen-2-yl)methyl)-1H-indol-3-yl)pyrimidin-2-amine (19c):** Yield: 77%, yellow solid; m. p. 174-176 °C; 1H NMR (CDCl3, 500 MHz): δ 8.40 (d, 1H, *J* = 8.4 Hz), 8.30 (d, 1H, *J* = 5.3 Hz), 7.90 (s, 1H), 7.40 (s, 1H), 7.20-7.30 (m, 2H), 7.00 (d, 1H, *J* = 5.3 Hz), 6.75 (s, 2H), 5.40 (s, 2H), 5.0 (s, 2H); 13C NMR (125 MHz, CDCl3): δ 162.97, 162.55, 157.34, 137.31, 136.89, 130.17, 129.55, 126.25, 126.01, 125.75, 122.93, 121.89, 121.61, 114.61, 109.76, 107.33, 45.30; IR (CHCl3): νmax 3307, 2956, 2924, 2854, 1737, 1575, 1537, 1455, 1391, 1214, 1190, 1157, 1082, 1016 cm-1; HRMS: *m/z* 341.0621 calcd for C17H13ClN4S + H+ (341.0622).

**4-(5-Bromo-1H-indol-3-yl)-N-((5-chlorothiophen-2-yl)methyl)pyrimidin-2-amine (19d):** Yield: 73%; yellow solid; m. p. 175-177 °C; 1H NMR (CDCl3, 400 MHz): δ 8.59 (s, 1H), 8.25 (d, 1H, *J* = 5.2 Hz), 7.78 (s, 1H), 7.40-7.37 (m, 1H), 7.24 (s, 1H), 6.91 (d, 1H, *J* = 5.2 Hz), 6.91 (d, 1H, *J* = 5.2 Hz), 6.78-6.75 (m, 2H), 5.38 (s, 2H), 5.02 (s, 2H-NH2 ); 13C NMR (CDCl3, 100 MHz): δ 163.11, 161.99, 157.84, 136.92, 135.65, 130.62, 130.18, 127.92, 126.11, 125.98, 125.92, 124.94, 115.23, 114.68, 111.26, 107.37, 45.84; IR (CHCl3): νmax 3400, 2955, 2924, 2854, 1738, 1577, 1537, 1457, 1389, 1189, 1156, 1019 cm-1; HRMS: *m/z* 418.9723 calcd for C17H12BrClN4S + H+ (418.9727).

**2-((3-(2-Aminopyrimidin-4-yl)-5-bromo-1H-indol-1-yl)methyl) isoindoline-1,3-dione (19e):** Yield: 32 %; pale yellow solid; m. p. 110-113 °C; 1H NMR (CDCl3, 500 MHz): δ 8.57 (s, 1H), 8.25 (s, 1H), 8.10 (s, 1H), 7.87-7.86 (t, 2H, *J* = 3.0 Hz), 7.77-7.74 (m, 3H), 7.40 (d, 1H), 6.94 (d, 1H, *J* = 5.5 Hz), 5.98 (s, 2H), 5.14 (s, 2H-NH2); 13C NMR (125 MHz, CDCl3): δ 167.42, 163.04, 162.10, 157.57, 135.42, 134.74, 131.79, 131.43, 127.66, 126.32, 124.69, 123.97, 115.56, 115.07, 112.08, 107.43, 47.30; IR (CHCl3): νmax 3368, 2955, 2925, 2855, 1775, 1721, 1577, 1540, 1459, 1401, 1334, 1219, 1151, 1082, 1019 cm-1; HRMS: *m/z* 448.0401 calcd for C21H14BrN5O2 + H+ (448.0404).

**4-(1-(Anthracen-10-ylmethyl)-1H-indol-3-yl)pyrimidin-2-amine (19f):** Yield: 86%; pale yellow solid; m. p. 246-248 °C; 1H NMR (DMSO-*d*6, 500 MHz): δ 8.87 (s, 1H), 8.41 (d, 1H, *J* = 3.4 Hz), 8.39 (s, 2H), 8.29-8.27 (m, 2H), 8.04-8.02 (m, 2H), 7.65-7.63 (m, 3H), 7.37 (s, 3H), 6.77 (d, 1H, *J* = 5.3 Hz), 6.48 (s, 2H-NH2 ), 6.36 (s, 2H); 13C NMR (DMSO-*d*6, 125 MHz): δ 163.26, 161.24, 157.38, 137.37, 131.02, 130.75, 129.22, 128.96, 128.52, 127.19, 125.75, 125.59, 125.56, 125.40, 123.62, 122.34, 121.86, 121.01, 113.36, 113.33, 110.77, 105.32, 105.29, 42.03; IR (CHCl3): νmax 3307, 2954, 2924, 2855, 1738, 1572, 1561, 1452, 1399, 1309, 1219, 1203, 1156, 1082, 1019 cm-1; HRMS: *m/z* 401.1760 calcd for C27H20N4 + H+ (401.1761).

**4-(1-(Anthracen-10-ylmethyl)-5-bromo-1H-indol-3-yl)pyrimidin-2-amine (19g):** Yield: 84%; pale yellow solid; m. p. 247-249 °C; 1H NMR (DMSO-*d*6, 400 MHz): δ 8.80 (s, 1H), 8.67 (d, 1H, *J* = 2.0 Hz), 8.33-8.31 (m, 2H), 8.23-8.21 (m, 2H), 7.96-7.91 (m, 2H), 7.60-7.57 (m, 4H), 7.49-7.46 (dd, 1H, *J* = 2.0 Hz), 7.34 (s, 1H), 6.64 (d, 1H, *J* = 5.2 Hz), 6.42 (s, 2H), 6.40 (s, 2H-NH2); 13C NMR (DMSO-*d*6, 100 MHz): δ 163.34, 160.98, 157.51, 136.17, 131.10, 130.81, 129.90, 129.33, 129.18, 127.34, 127.28, 125.48, 125.06, 124.27, 123.59, 114.06, 112.97, 112.87, 105.29, 42.38; IR (CHCl3): νmax 3400, 2955, 2924, 2854, 1735, 1575, 1535, 1453, 1385, 1196, 1158, 1020 cm-1; HRMS: *m/z* 479.0806 calcd for C27H19BrN4 + H+ (479.0866).

**General procedure for preparation of C-ring modified meridianin analogs** **22a-c**. To the solution of indole-3-carboxaldehydes **20a-c** (1 mmol) in acetonitrile (5 mL) was added amberlyst-15 (50% w/w with respect to indole-3-carboxaldehyde) and anthranilamide (1 equiv) and the resulting mixture was stirred at room temperature for overnight. After completion, the reaction mixture was filtered, filtrate was concentrated and purified by silica-gel column chromatography (#100-200) to get products **22a-c**.

**2-(1H-Indol-3-yl)-2,3-dihydroquinazolin-4(1H)-one (22a):** Yield: 47%; off-white solid; m. p. 177-180 °C; 1H NMR (CDCl3, 400 MHz): δ 8.60 (s, 1H), 7.97 (dd, 1H , *J* = 7.8 & 1.2 Hz), 7.89 (d, 1H, *J* = 7.9 Hz), 7.41 (d, 1H , *J* = 8.2 Hz), 7.36 – 7.29 (m, 2H), 7.15 (t, 1H, *J* = 7.5 Hz), 6.90 (t, 1H, *J* = 7.5 Hz), 6.67 (d, 1H, *J* = 8.0 Hz), 6.18 (s, 1H), 5.98 (s, 1H), 4.55 (s, 1H); 13C NMR (CD3OD, 100 MHz): δ 168.14, 150.72, 138.58, 135.14, 128.94, 126.80, 125.73, 123.04, 120.95, 120.42, 119.20, 116.19, 116.04, 114.69, 112.63, 64.02; IR (CHCl3): νmax 3369, 2955, 2925, 2854, 1737, 1647, 1485, 1456, 1155, 1019 cm-1; HRMS: *m/z* 264.1129 calcd for C16H13N3O + H+ (264.1131).

**2-(5-Bromo-1H-indol-3-yl)-2,3-dihydroquinazolin-4(1H)-one (22b):** Yield: 43%; light green solid; m. p. 145-147 °C; 1H NMR (CDCl3,400 MHz): δ 8.66 (s, 1H), 8.05 (d, 1H *, J* = 1.5 Hz), 7.96 (dd, 1H, *J* = 7.8 &1.3 Hz), 7.40 – 7.22 (m, 4H), 6.91 (t, 1H, *J* = 7.2 Hz), 6.69 (d, 1H, *J* = 8.0 Hz), 6.12 (d, 2H, *J* = 5.6 Hz), 4.50 (s, 1H); 13C NMR (CD3OD, 125 MHz): δ 166.30, 148.22, 135.23, 133.71, 126.44, 125.55, 125.22, 124.55, 121.92, 118.32, 114.54, 114.37, 112.88, 112.32, 111.87, 62.22; IR (CHCl3): νmax 3305, 2955, 2924, 2857, 1651, 1611, 1489, 1464, 1401, 1191, 1157, 1082, 1016 cm-1; HRMS: *m/z* 342.0248 calcd for C16H12BrN3O + H+ (342.0237).

**2-(5-Iodo-1H-indol-3-yl)quinazolin-4(3H)-one (22c):** Yield: 57%; pale yellow solid; m. p. 309-311 °C; 1H NMR (DMSO-*d*6, 400 MHz): δ 12.21 (s, 1H), 12.05 (s, 1H), 9.05 (d, 1H, *J* = 1.6 Hz), 8.53 (d, 1H, *J* = 2.8 Hz), 8.13-8.10 (dd, 1H, *J* = 1.2 Hz), 7.83-7.78 (m, 1H), 7.72 (d, 1H, *J* = 7.6 Hz), 7.53-7.51 (dd, 1H, *J* = 1.6 Hz), 7.46-7.42 (m, 1H), 7.36 (d, 1H, *J* = 8.4 Hz); 13C NMR (DMSO-*d*6, 100 MHz): δ 162.08, 149.81, 149.40, 135.92, 134.52, 130.67, 130.62, 129.82, 127.92, 126.92, 125.77, 125.41, 120.37, 114.49, 107.82, 85.29; IR (CHCl3): νmax 3306, 2955, 2924, 2857, 1739, 1650, 1491, 1464, 1400, 1343, 1191, 1168, 1082, 1015 cm-1; HRMS: *m/z* 387.9950 calcd for C16H10IN3O + H+ (387.9941).

**S2.2. Biology protocols**

**Assay for *in vitro* antimalarial activity.** The assay is based on the determination of plasmodial LDH activity. For the assay, a suspension of red blood cells infected with D6 or W2 strains of *P*. *falciparum* (200 L, with 2% parasitemia and 2% hematocrit in RPMI 1640 medium supplemented with 10% human serum and 60 µg/mL Amikacin) was added to the wells of a 96- well plate containing 10 L of test samples diluted in medium at various concentrations. The plate was placed in a modular incubation chamber (Billups-Rothenberg, CA) flushed with a gas mixture of 90% N2, 5% O2, and 5% CO2 and incubated at 37 ºC, for 72 h. Parasitic LDH activity was determined by using MalstatTM reagent (Flow Inc., Portland, OR) according to the procedure of Makler and Hinrichs.6 Briefly, 20 L of the incubation mixture was mixed with 100 L of the MalstatTM reagent and incubated at room temperature for 30 min. Twenty microliters of a 1:1 mixture of NBT/PES (Sigma, St. Louis, MO) was then added and the plate is further incubated in the dark for 1 h. The reaction was then stopped by the addition of 100 L of a 5% acetic acid solution. The plate was read at 650 nm using the EL-340 Biokinetics Reader (Bio-Tek Instruments, Vermont). IC50 values were computed from the dose response curves. Artemisinin and chloroquine were included in each assay as the drug controls. DMSO (0.25%) was used as vehicle control.

**Assay for *in vitro* antileishmanial activity.** Antileishmanial activity of the compounds was tested *in vitro* against a culture of *L. donovani* promastigotes. They were grown in RPMI 1640 medium supplemented with 10% fetal calf serum (Gibco Chem. Co.) at 26 ºC. A 3 day-old culture was diluted to 5 × 105 promastigotes/mL. Drug dilutions were prepared directly in cell suspension in 96-well plates. Plates were incubated at 26 ºC for 48 h and growth of leishmania promastigotes was determined by Alamar Blue assay as described earlier.7 The standard fluorescence was measured on a Fluostar Galaxy plate reader (BMG Lab Technologies) at excitation wavelength of 544 nm and emission wavelength of 590 nm. Pentamidine and amphotericin B were used as the standard antileishmanial agents. IC50 and IC90 values were computed from dose response curves generated by plotting percent growth versus drug concentration.

**Assay for *in vitro* antimicrobial activity.** Susceptibility testing against *C. albicans*, *C. neoformans*, methicillin-resistant *S. aureus* (MRS), and *A. fumigatus* was performed using a modified version of the NCCLS methods.8 Susceptibility testing against *M. intracellulare* was done using the modified Alamar Blue procedure of Franzblau *et al.*9 Samples (dissolved in DMSO) were serially diluted using 0.9% saline and transferred in duplicate to 96-well microplates. Microbial inocula were prepared after comparison of the absorbance at 630 nm of cell suspensions to the 0.5 McFarland standard and diluting the suspensions in broth to afford recommended inocula. Microbial inocula were added to the diluted samples to achieve a final volume of 200 uL. Growth, solvent, and media controls were included in each assay. Plates were read at either 530 nm or 544ex/590em (*M. intracellulare* and *A. fumigatus*) prior to and after incubation. Percent growth was plotted versus test concentration to afford the IC50.

**Cytotoxicity screening.** The in vitro cytotoxicity was determined against Vero (monkey kidney fibroblasts), HEPG2 (human hepatoma cells) and LLC-PK11 (pig kidney epithelial cells). The assay was performed in 96-well tissue culture-treated plates as described earlier.10 Briefly, cells were seeded to the wells of 96-well plate (25,000 cells/well) and incubated for 24 h. Samples at different concentrations were added and plates were again incubated for 48 h. The number of viable cells was determined by Neutral Red assay. IC50 values were determined from dose curves of percent growth versus test concentrations. Doxorubicin was used as a positive control.

**S2. Scanned copies of 1H, 13C and DEPT135 NMR spectras of all compounds**

S2.1.1H, 13C and DEPT135 NMR spectraof meridianinC(**3**)

**
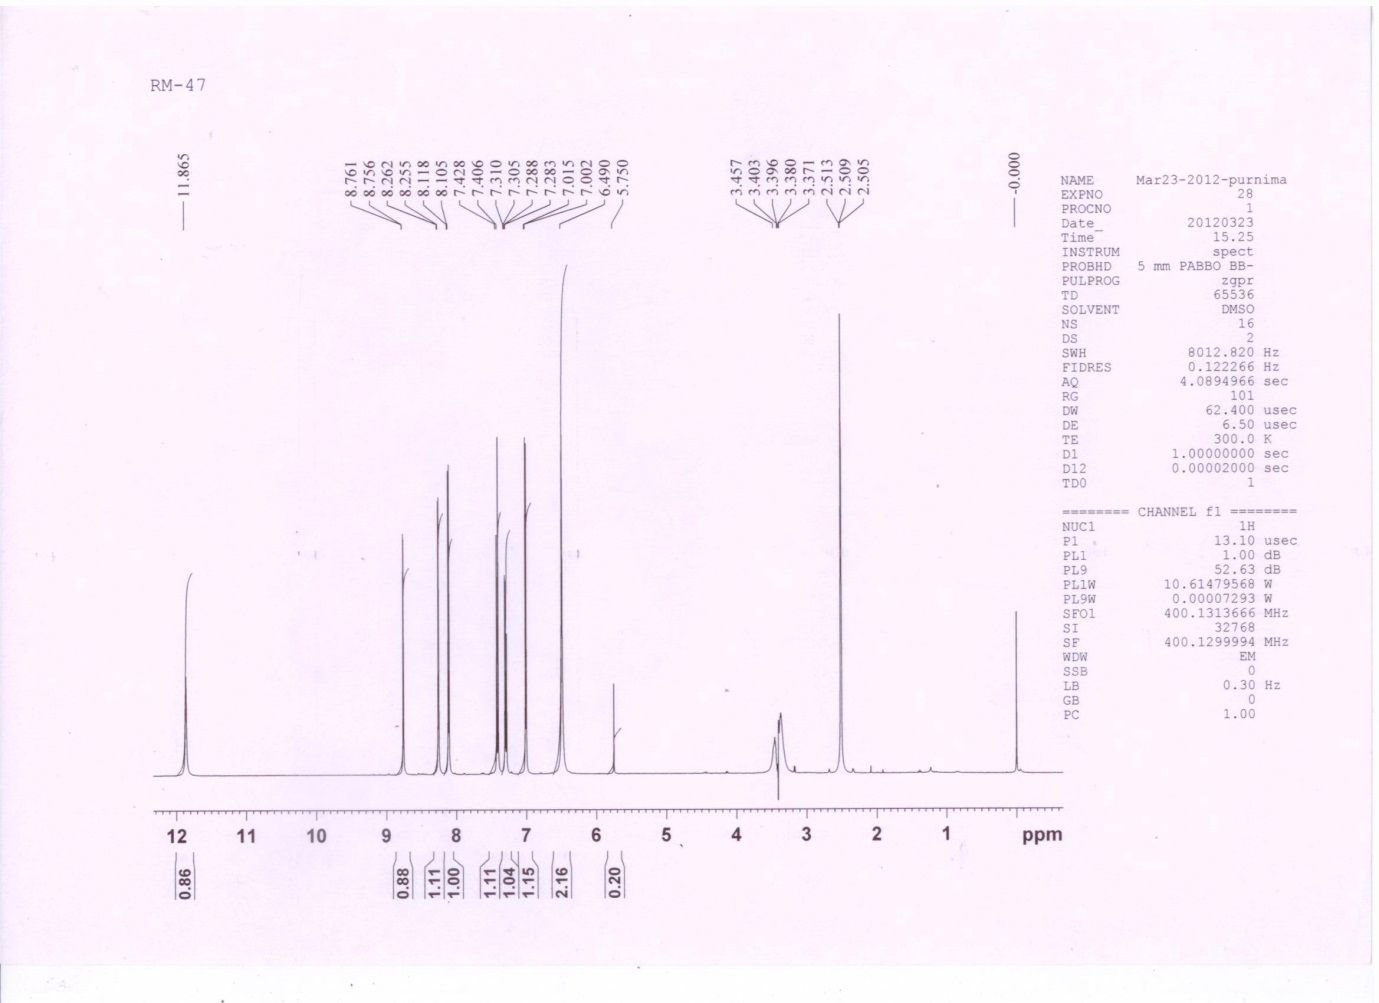
**

**
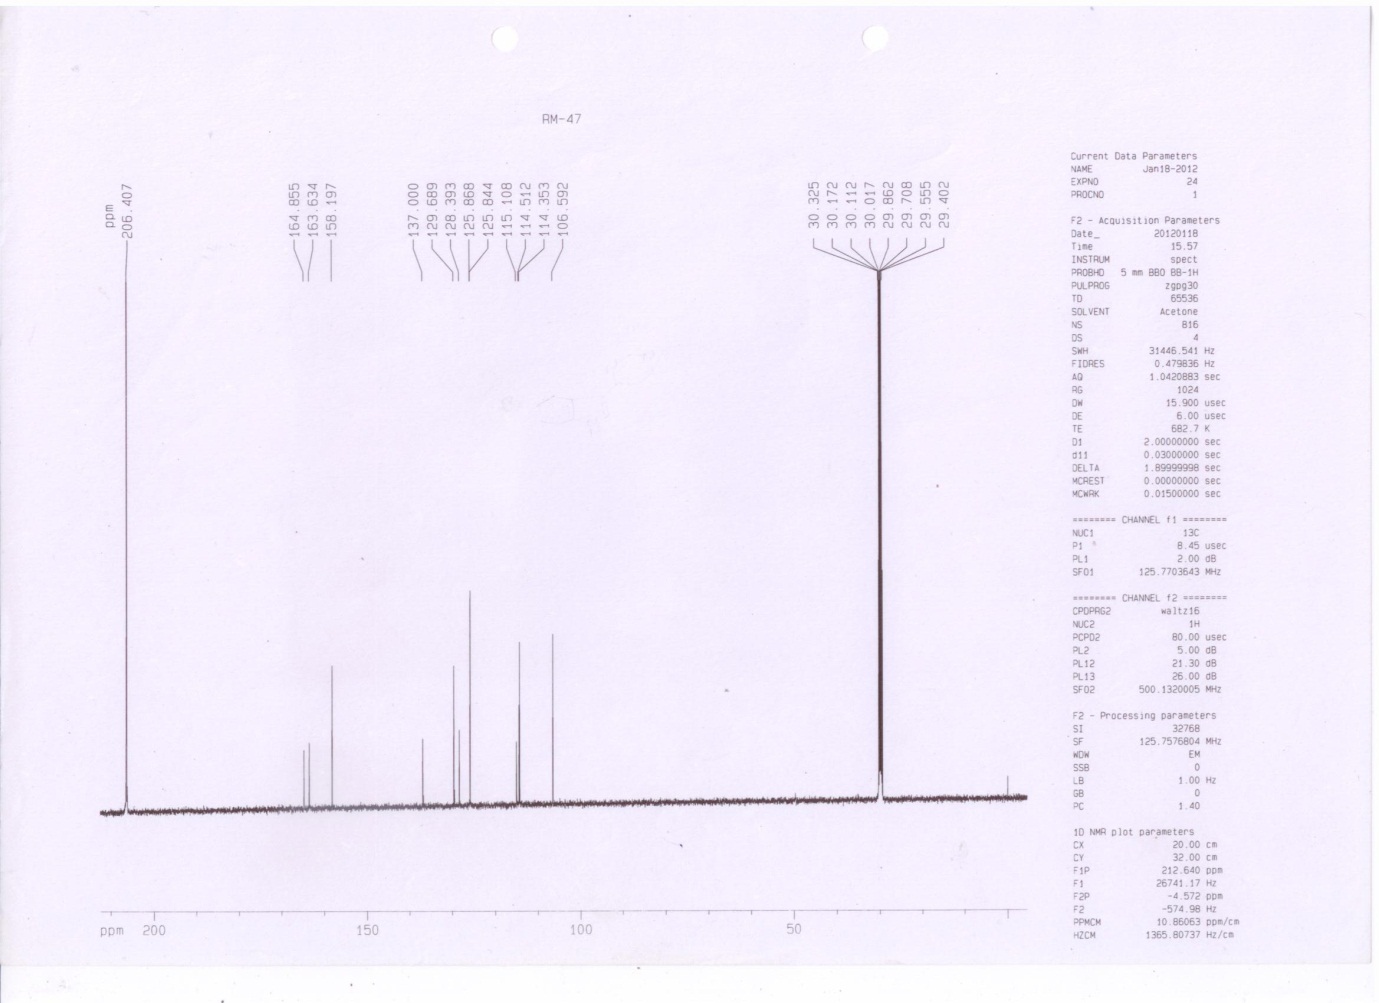
**

**
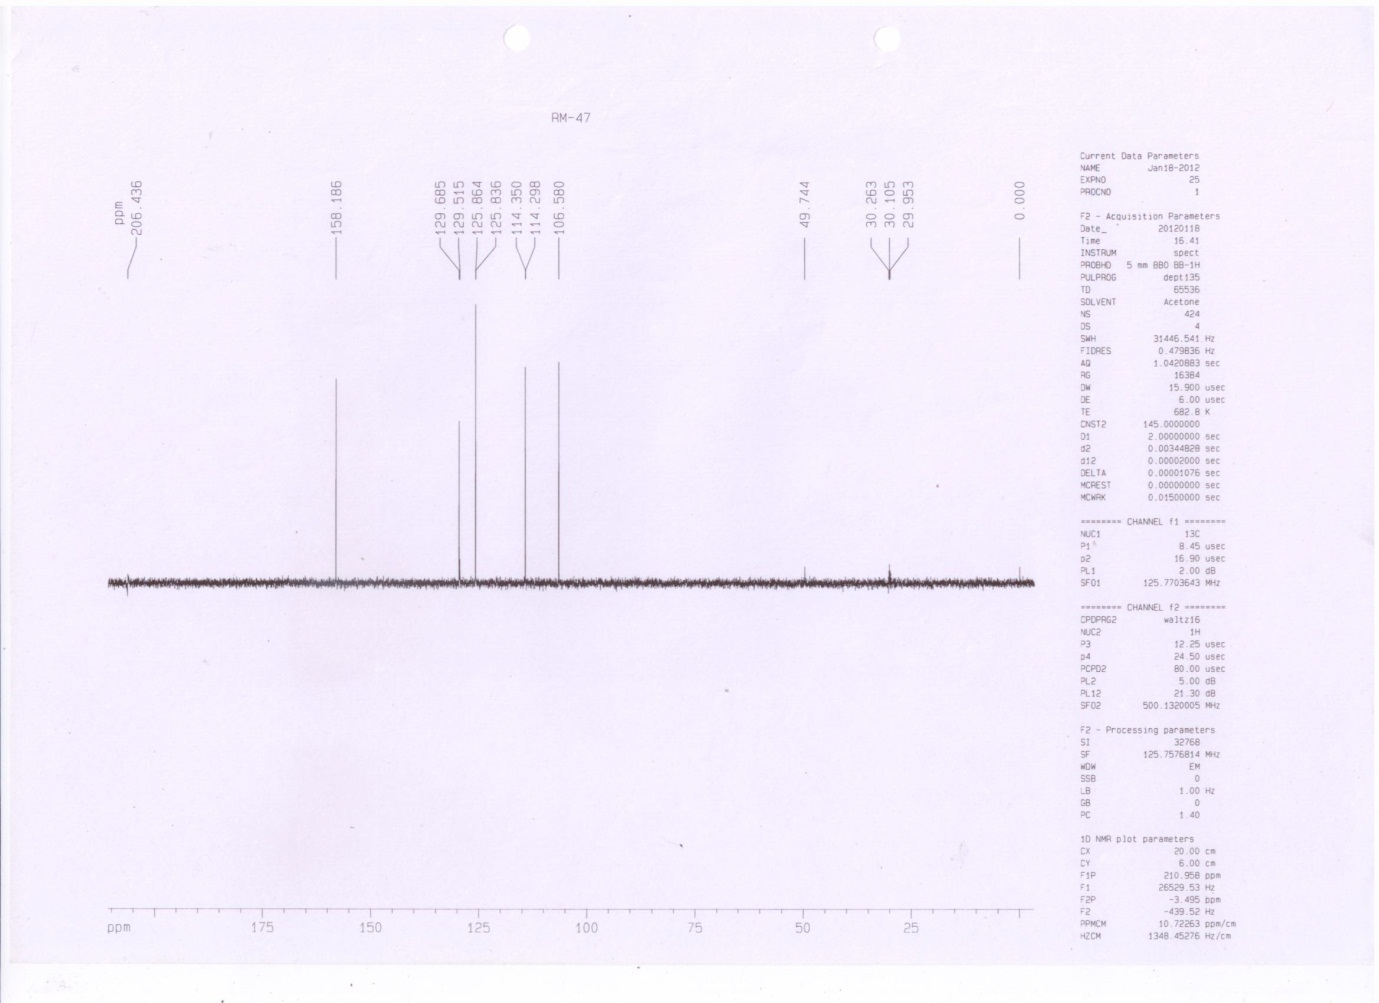
**

S2.2.1H, 13C and DEPT135 NMR spectraof meridianin G (**7**)


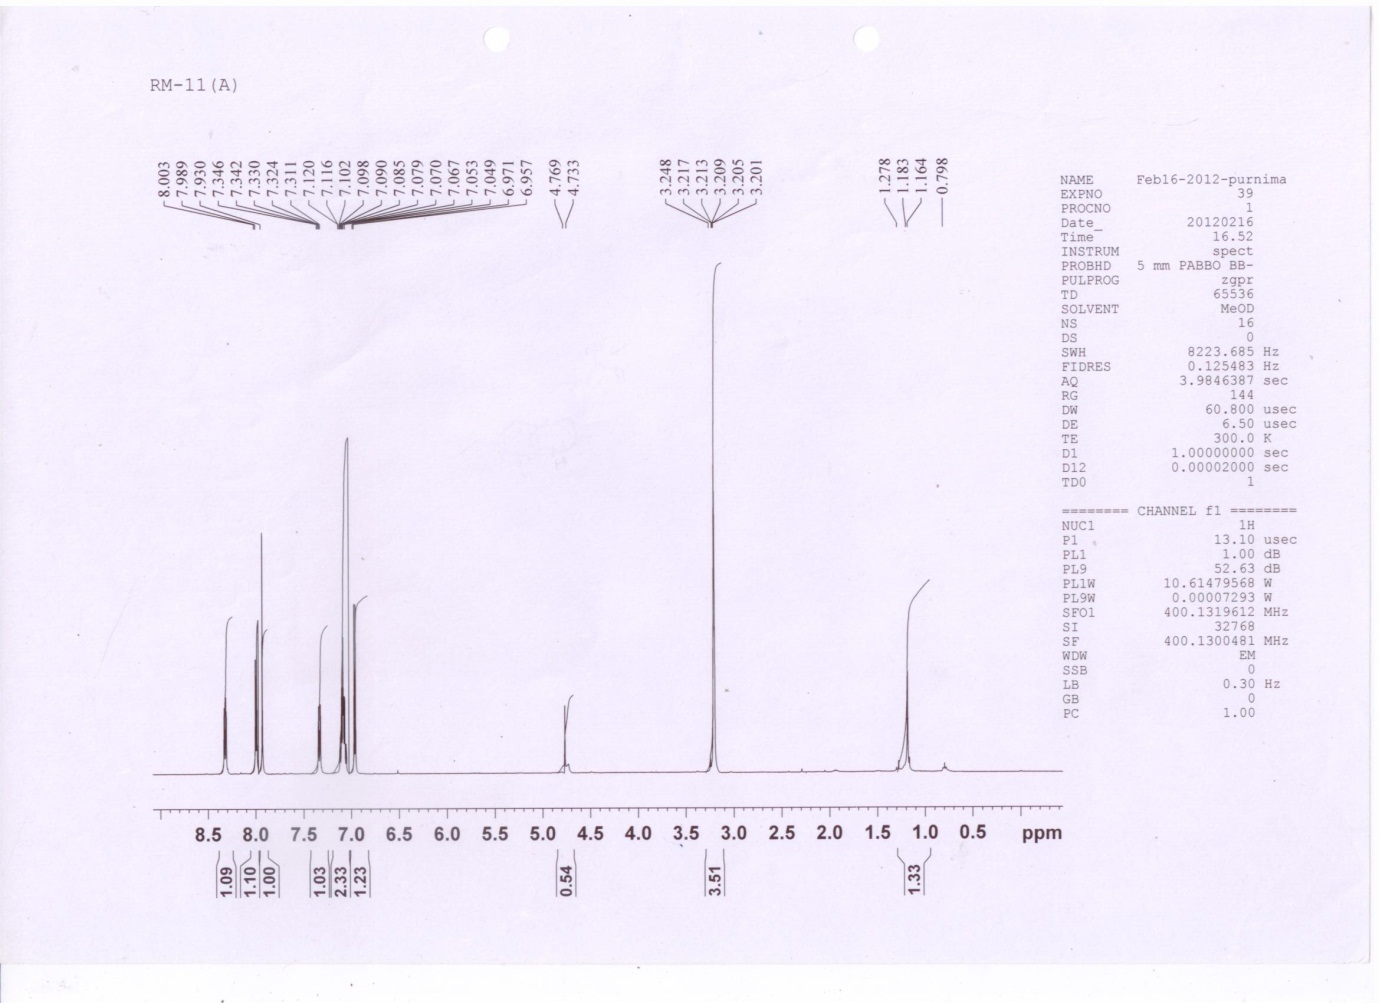


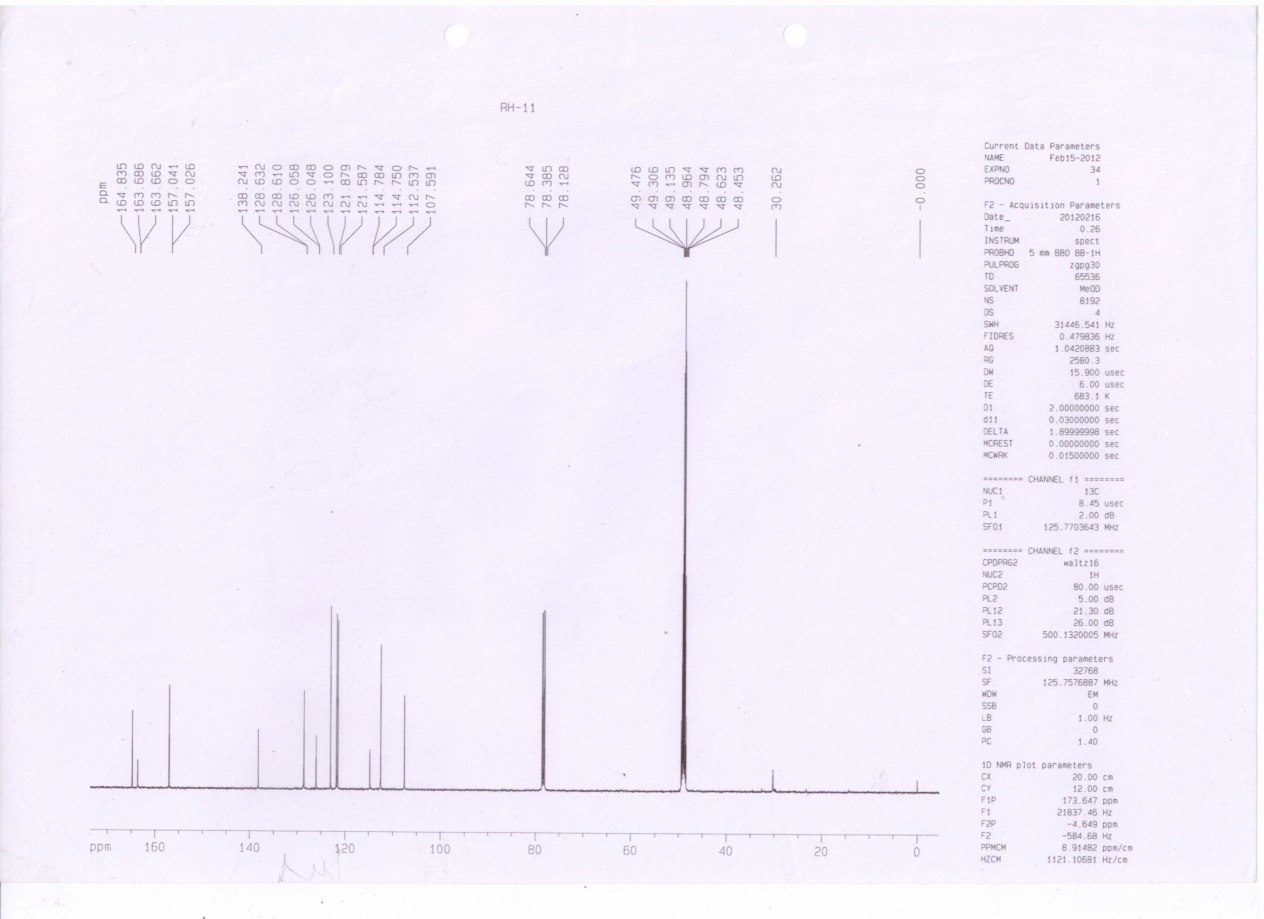


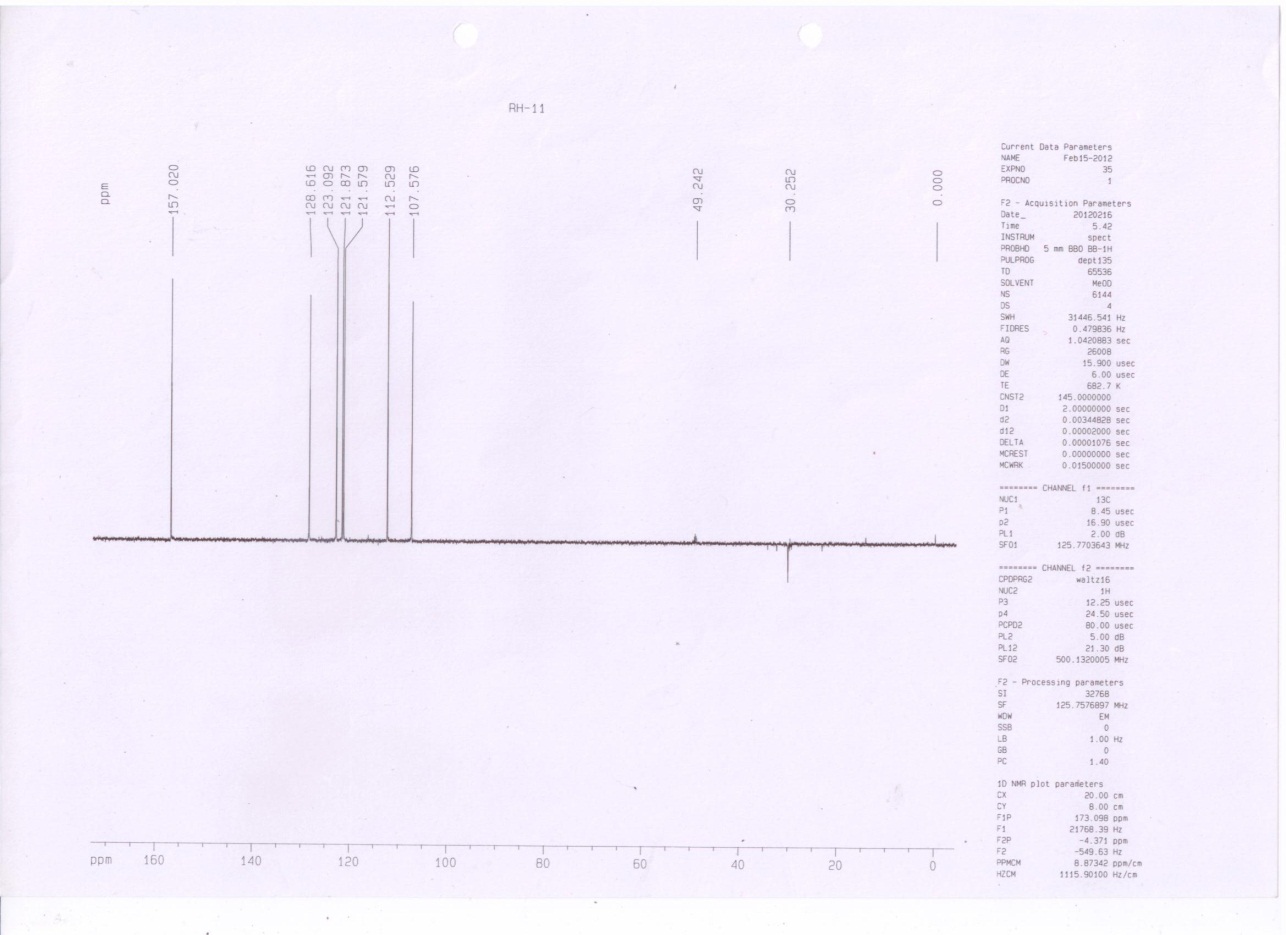


S2.3.1H, 13C and DEPT135 NMR spectra of 4-(5-bromo-1-(2-methoxyethyl)-1H-indol-3-yl)pyrimidin-2-amine (**15**)

**
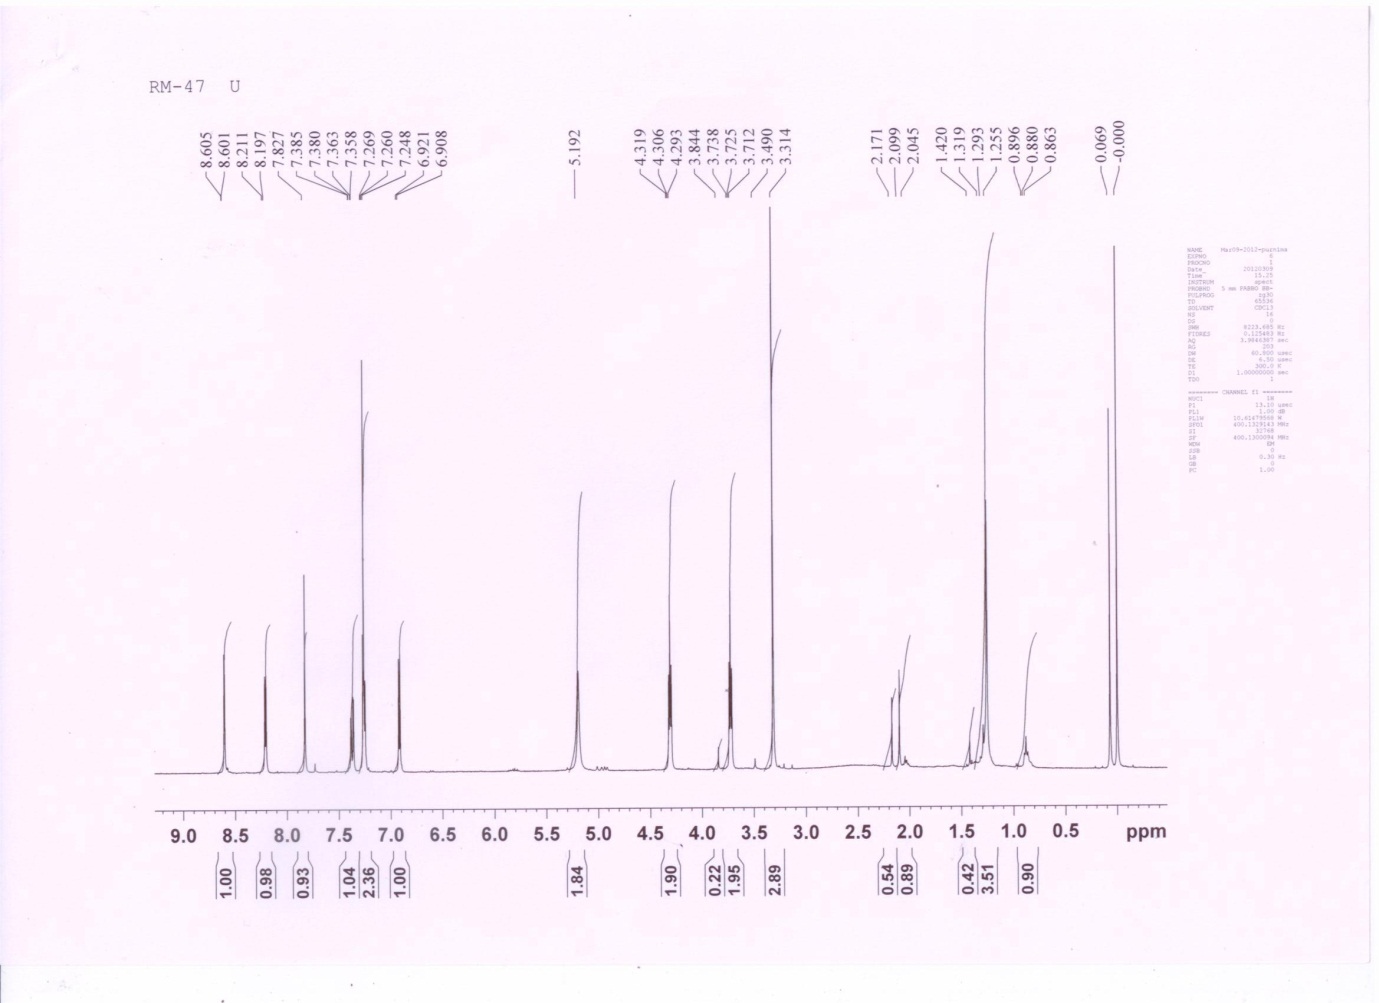
**

**
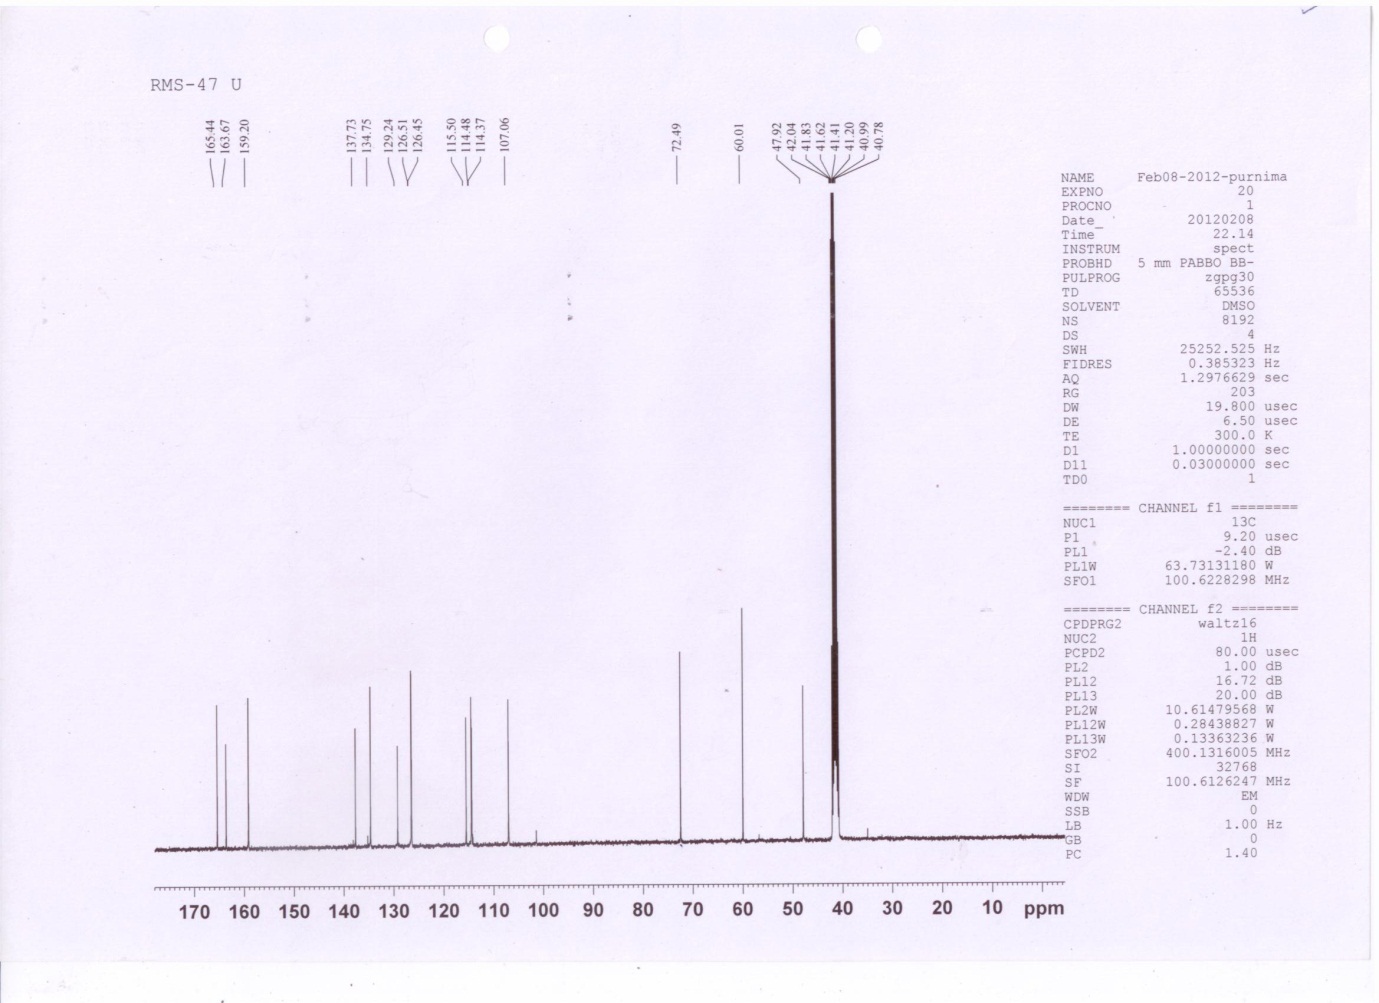
**

**
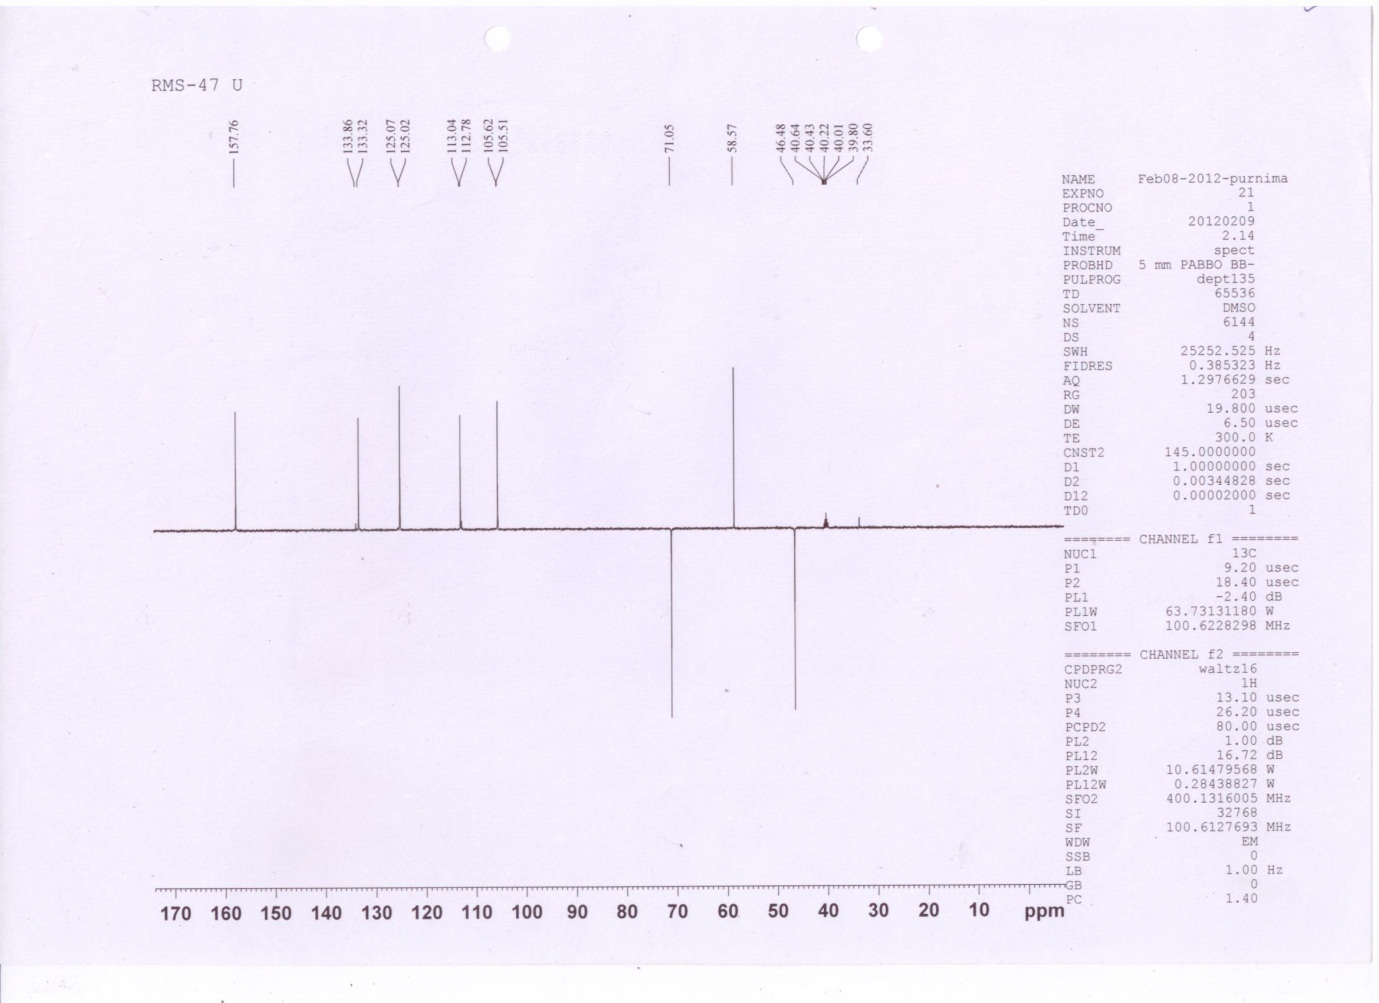
**

S2.4. 1H, 13C and DEPT135 NMR spectra of (3-(2-aminopyrimidin-4-yl)-1H-indol-1-yl)(morpholino)methanone (**17a**)

**
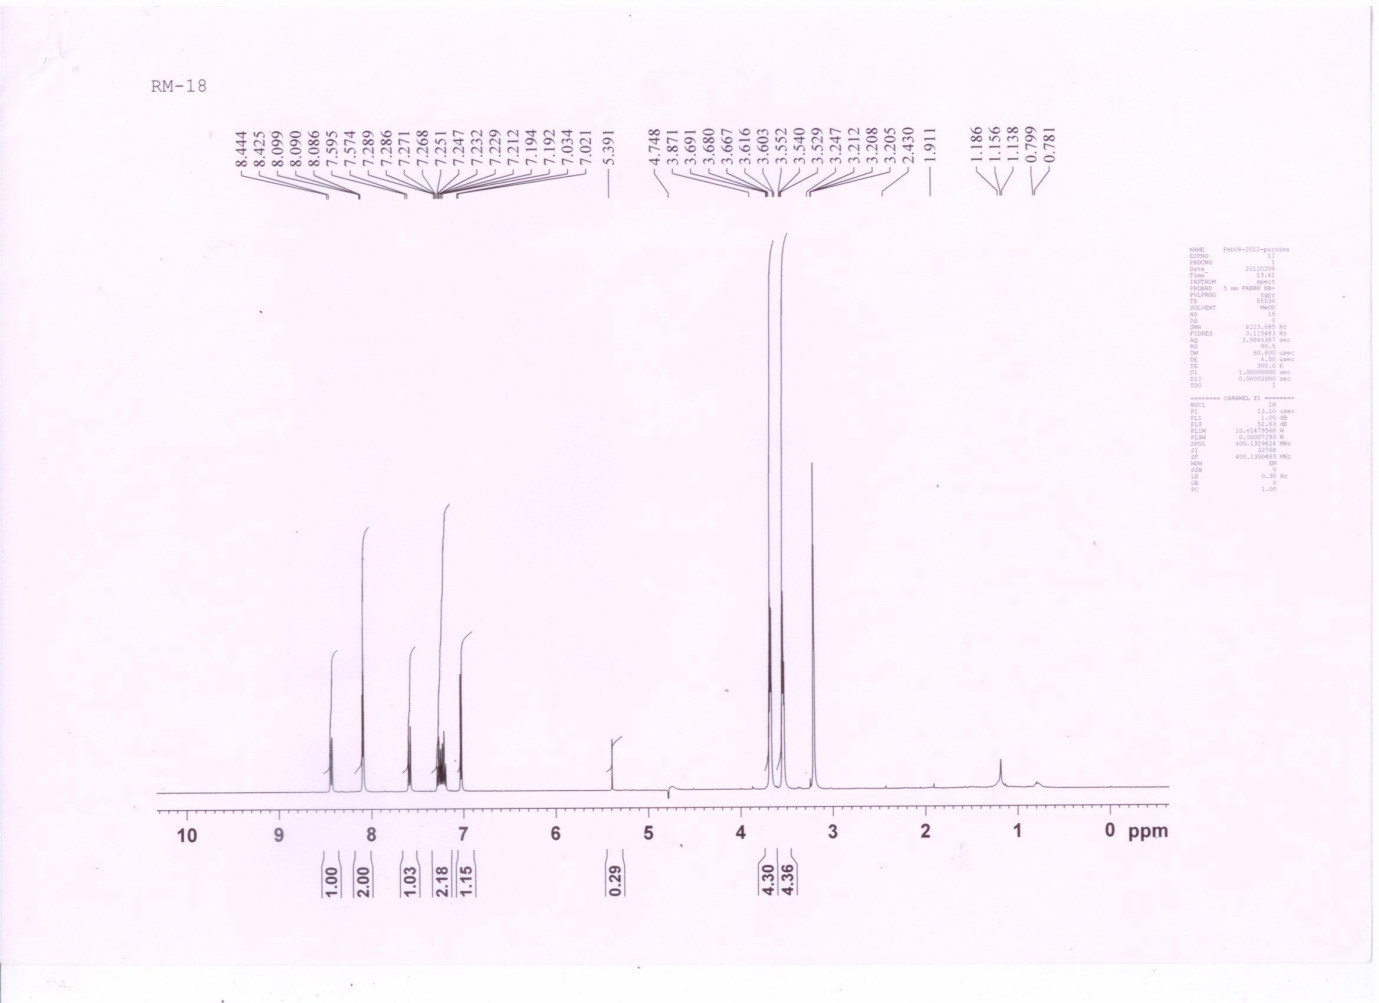
**

**
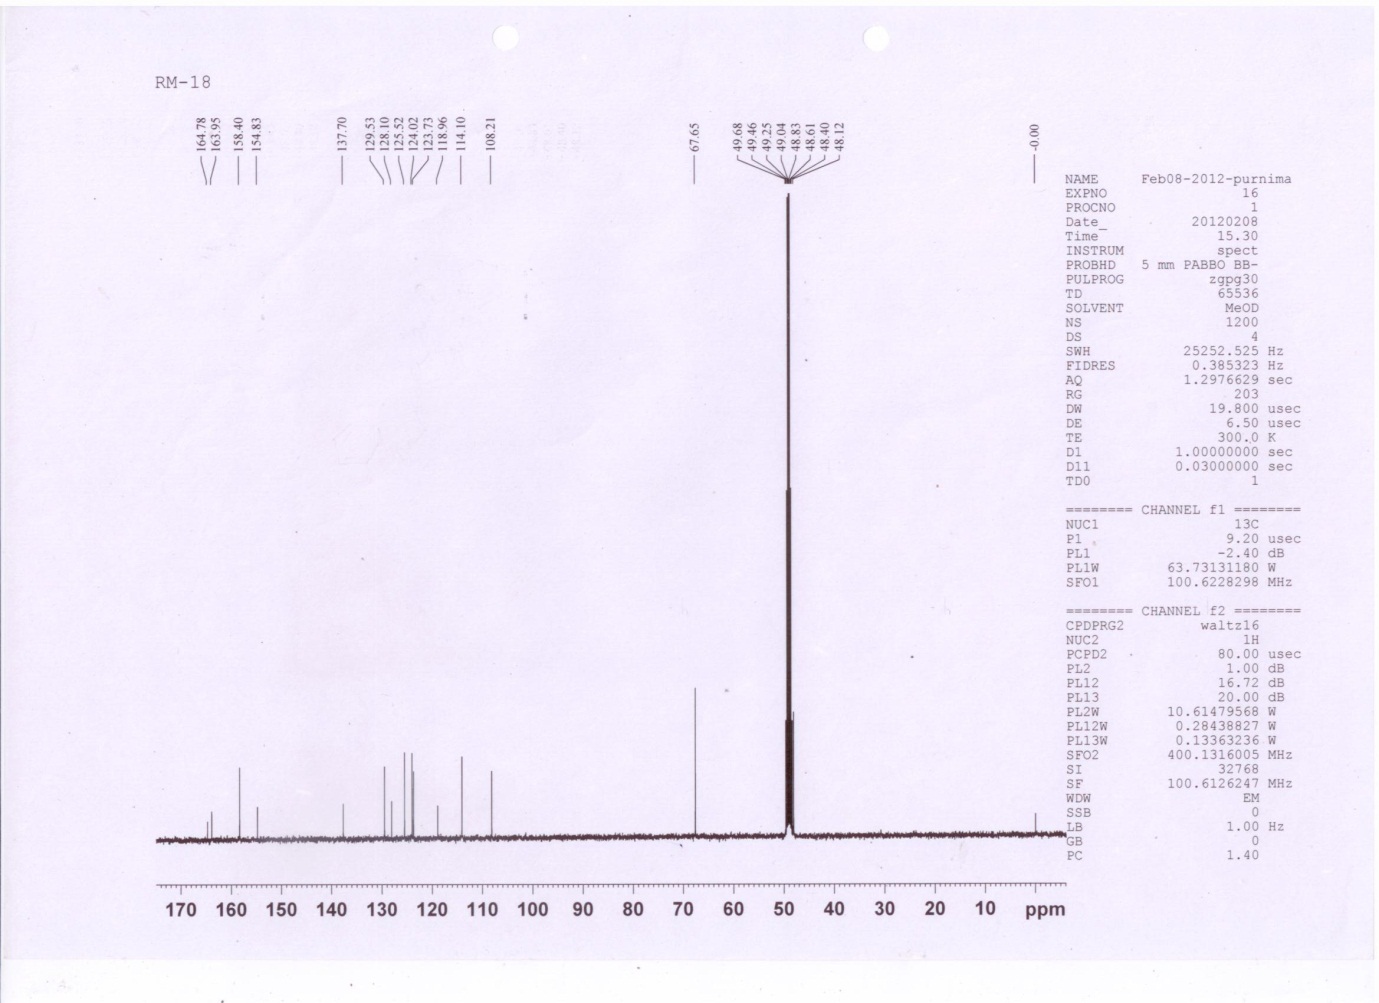
**

**
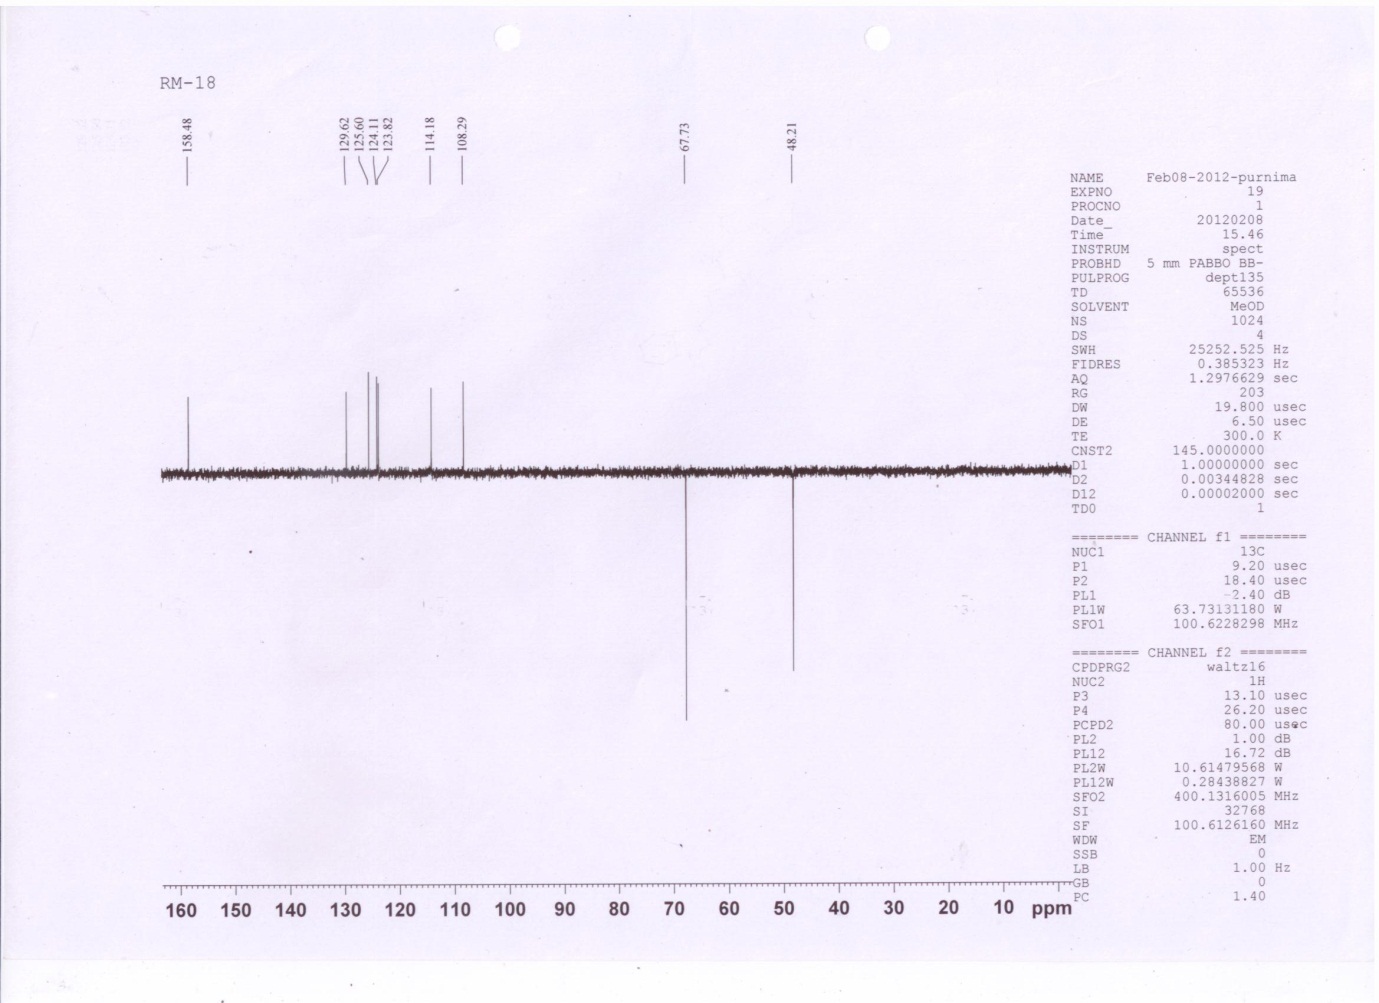
**

S2.5. 1H, 13C and DEPT135 NMR spectra of (3-(2-aminopyrimidin-4-yl)-5-bromo-1H-indol-1-yl)(morpholino)methanone (**17b**)

**
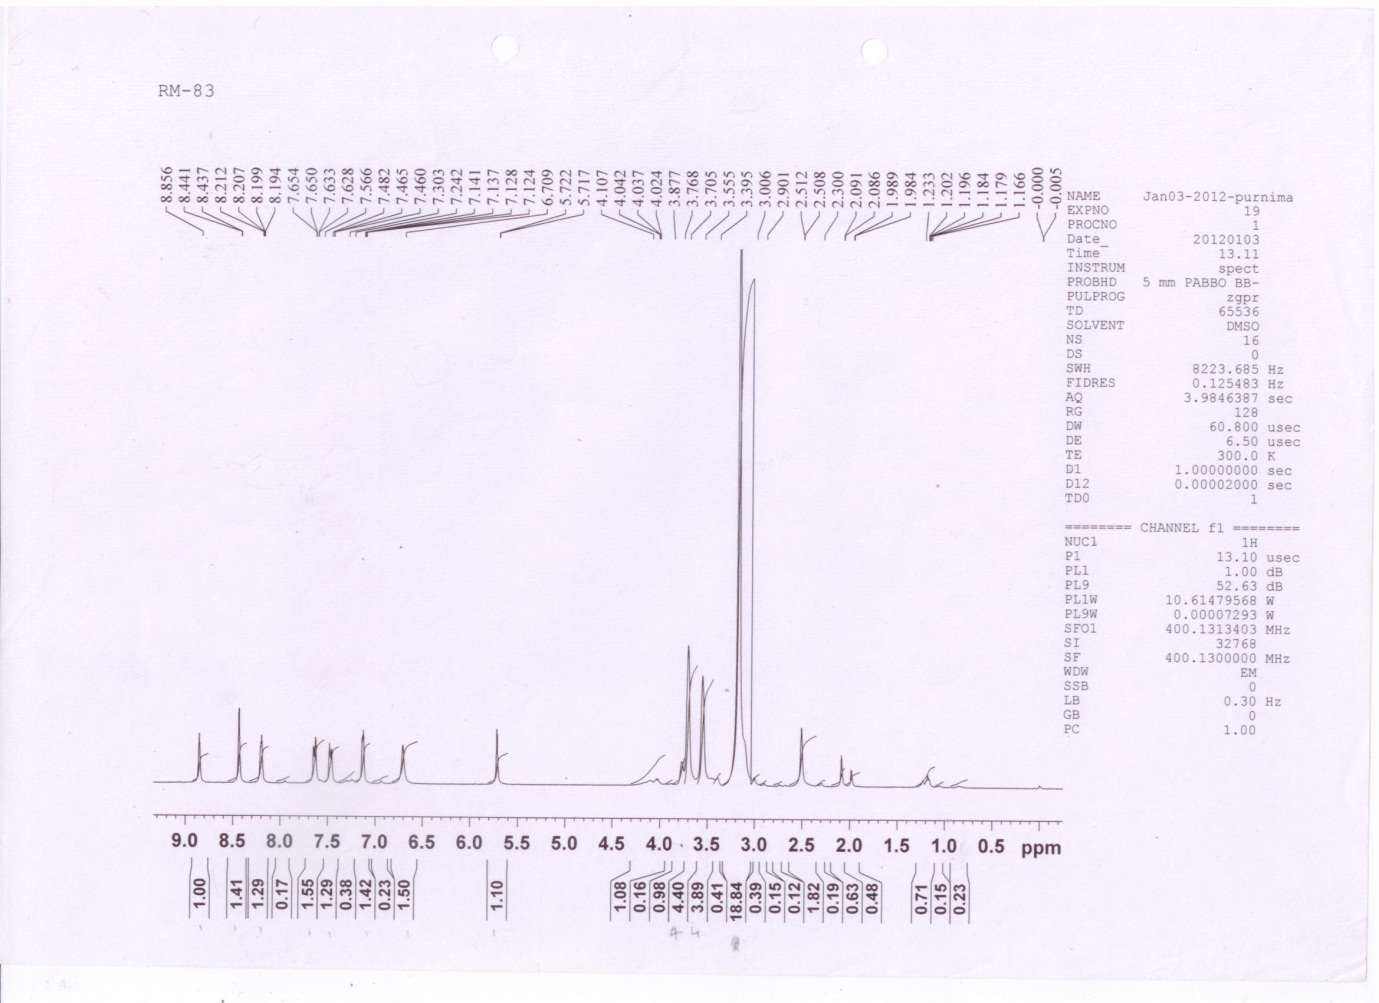
**

**
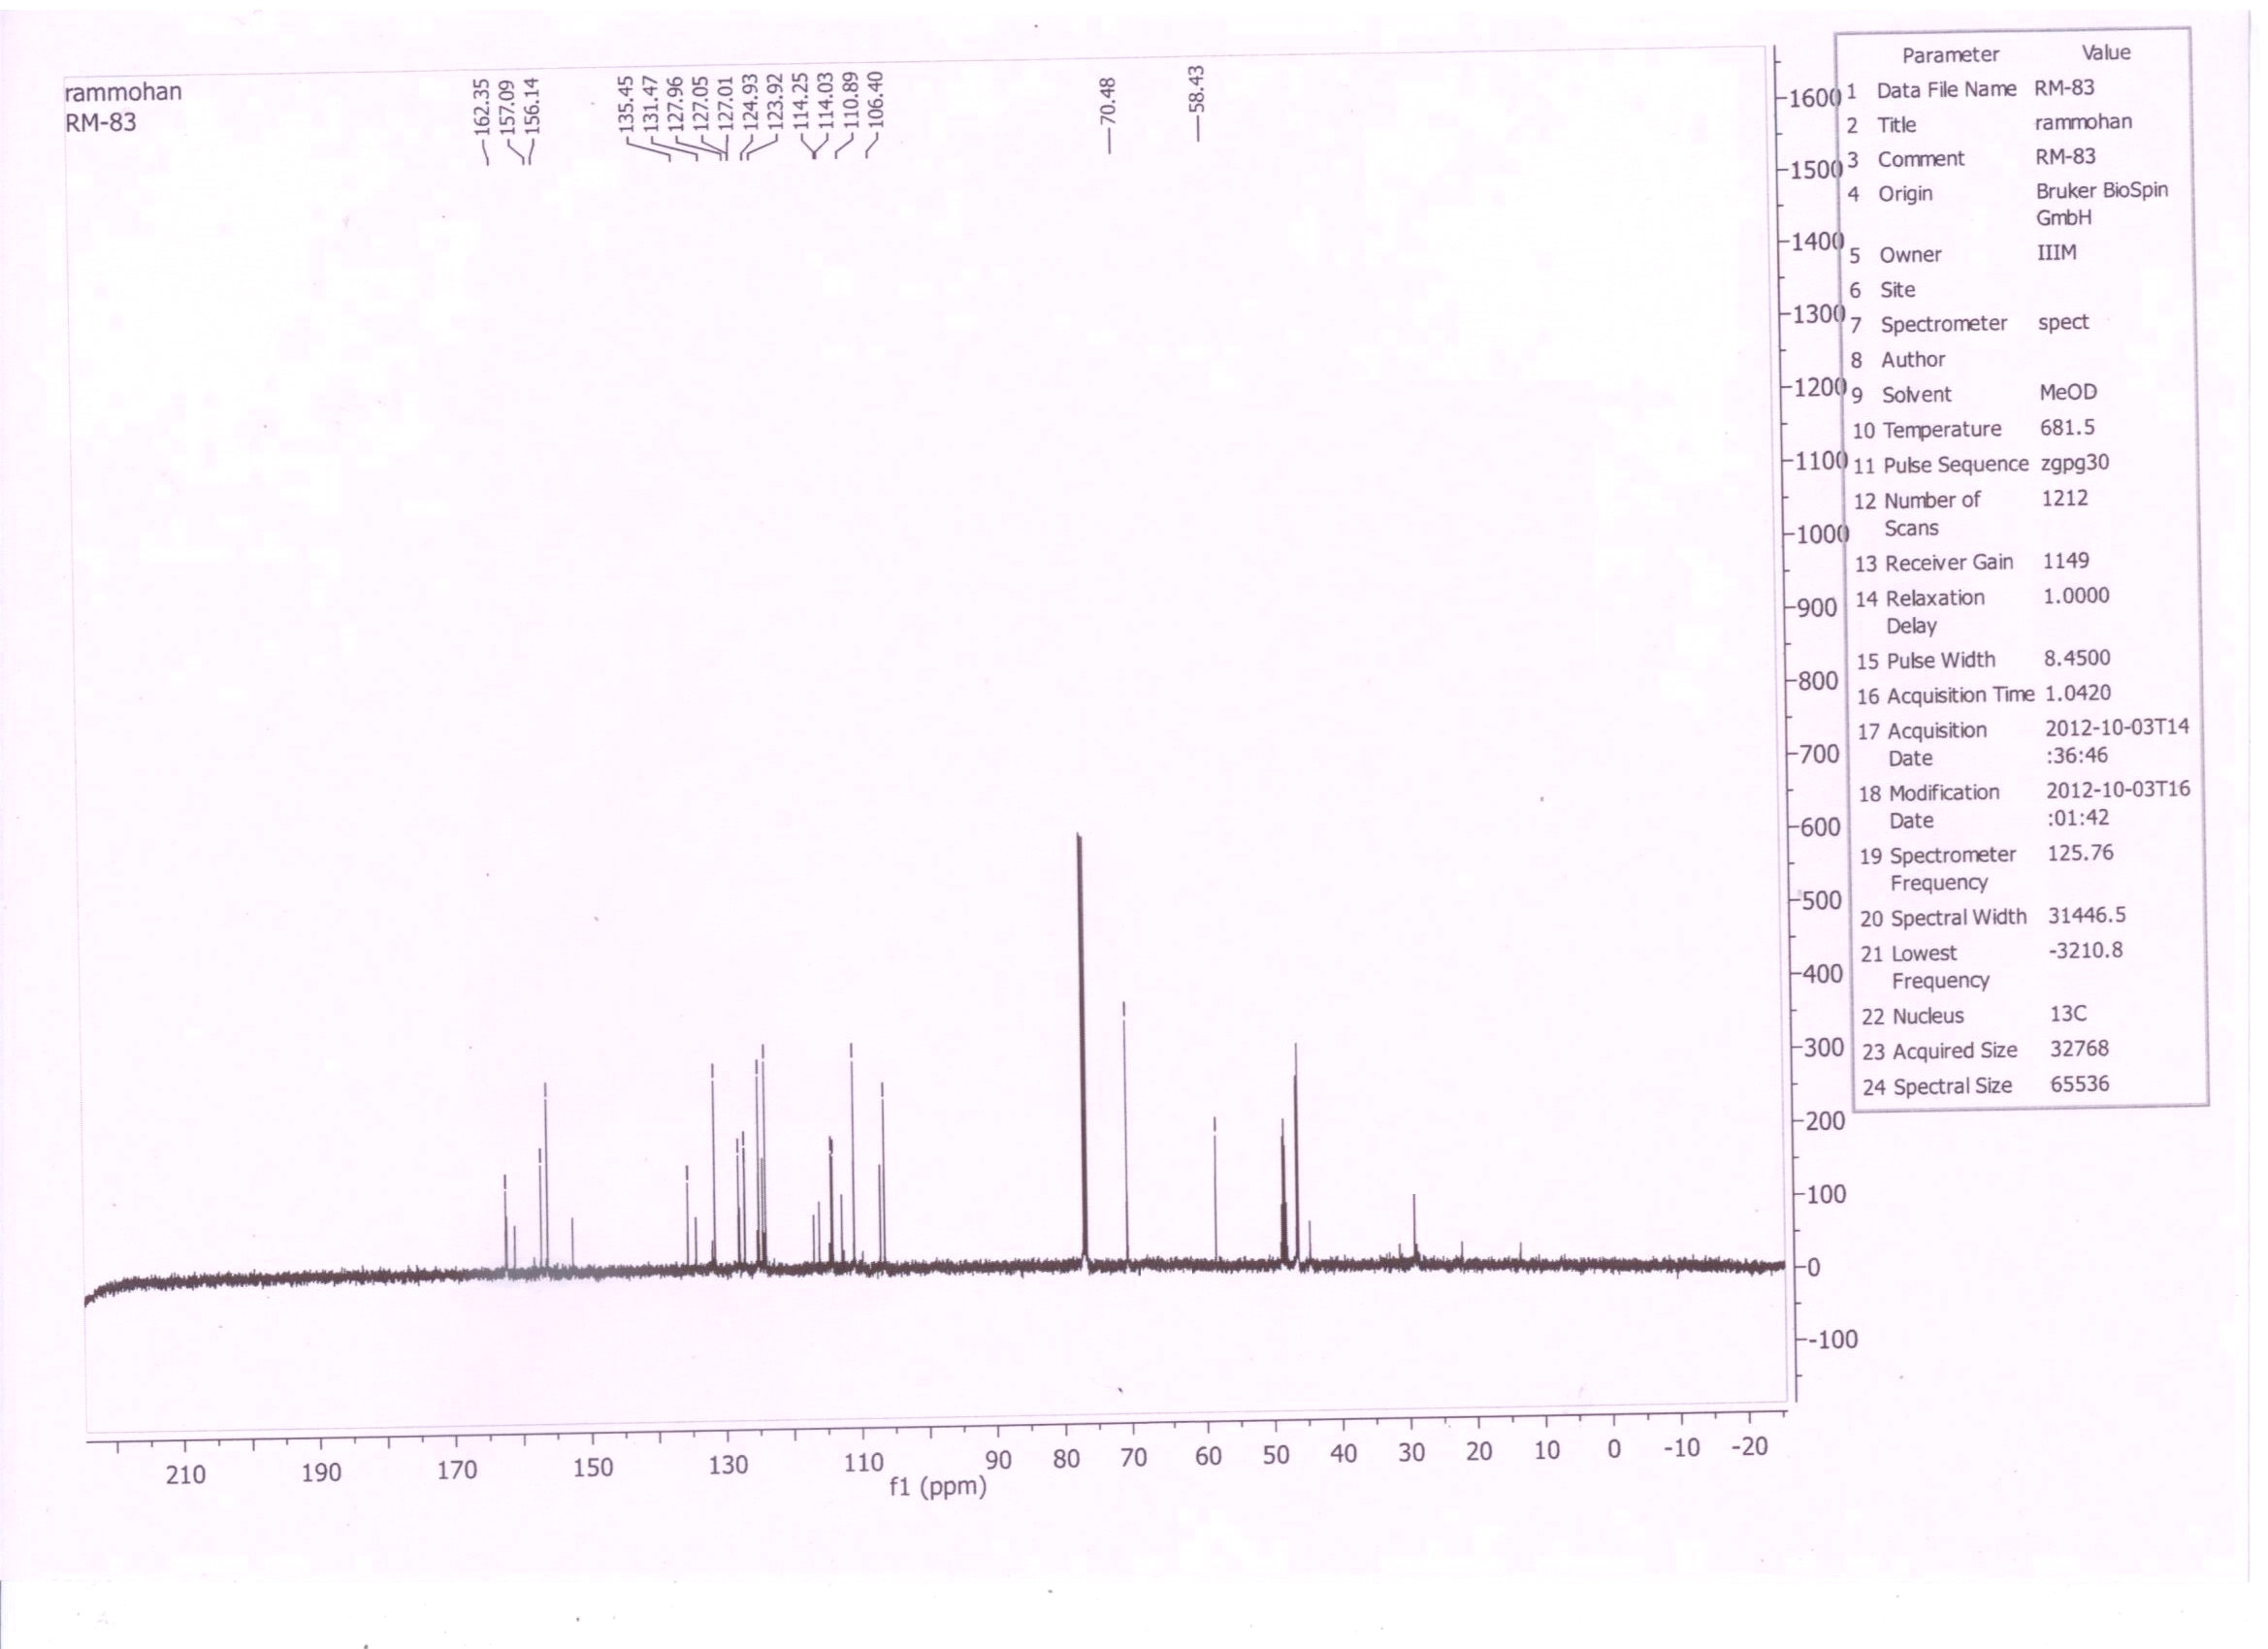
**

**
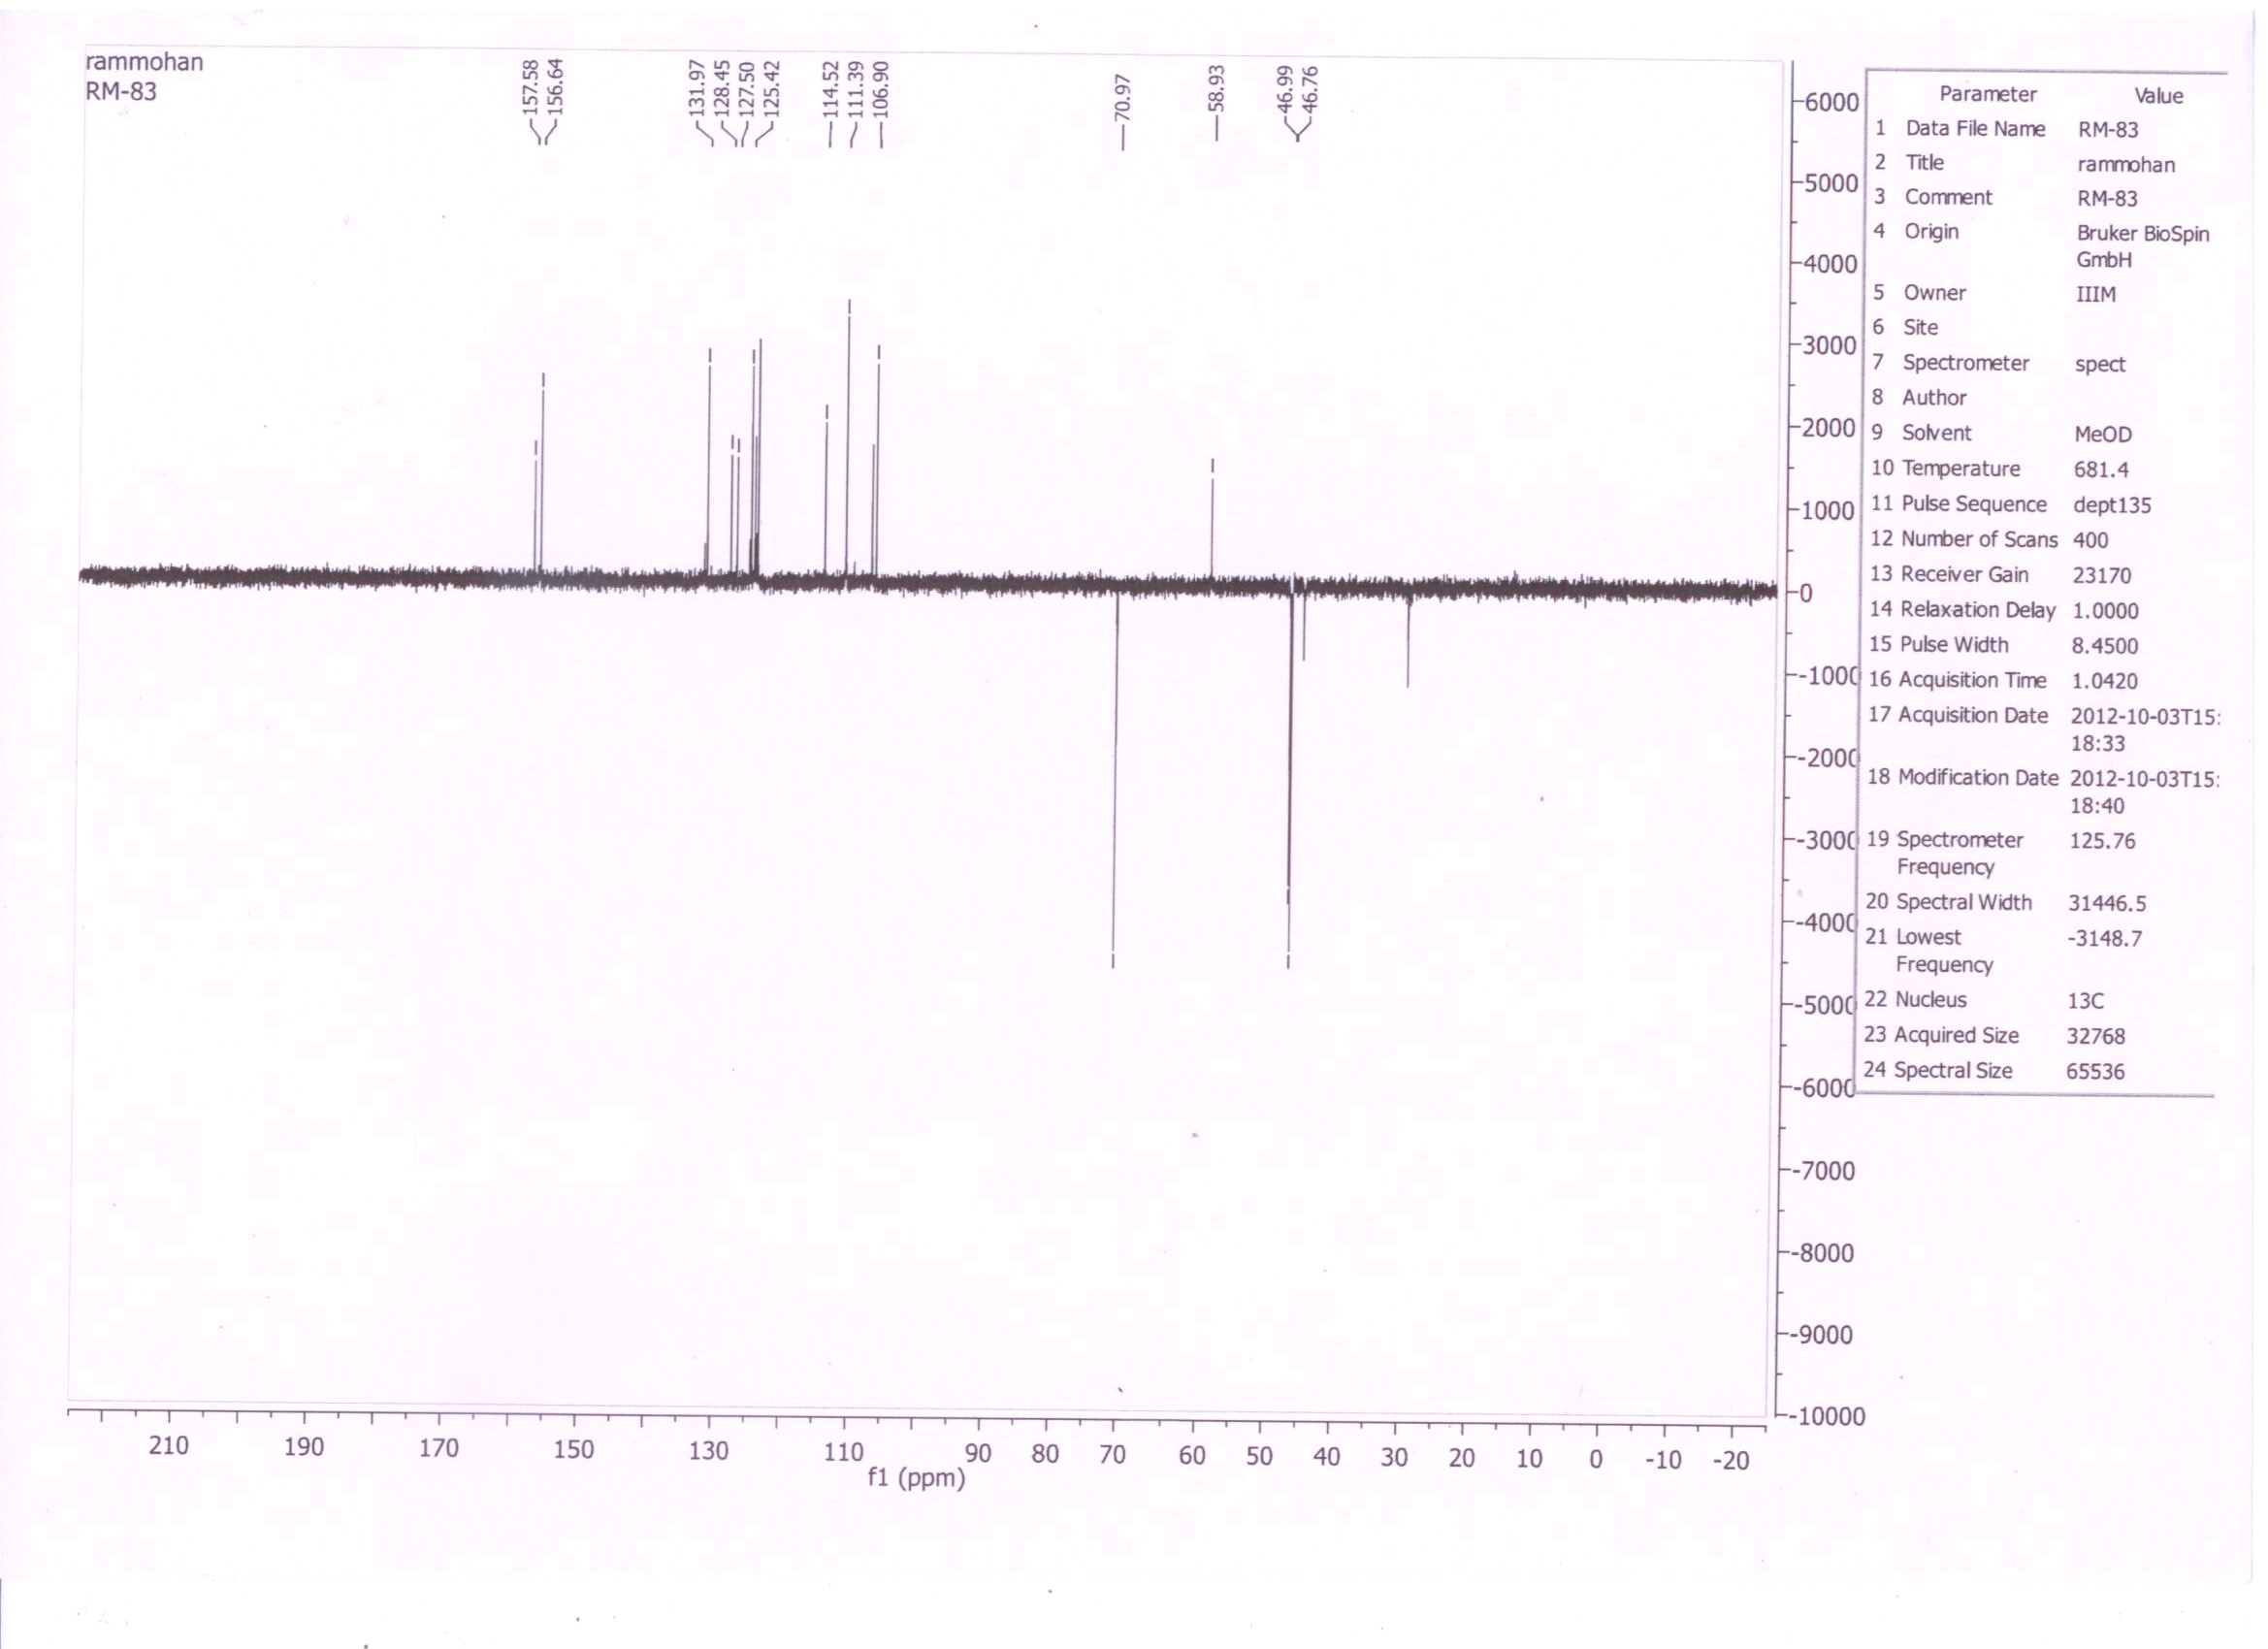
**

S2.6. 1H, 13C and DEPT135 NMR spectra of (3-(2-aminopyrimidin-4-yl)-1H-indol-1-yl)(4-methylpiperazin-1-yl)methanone (**17c**)

**
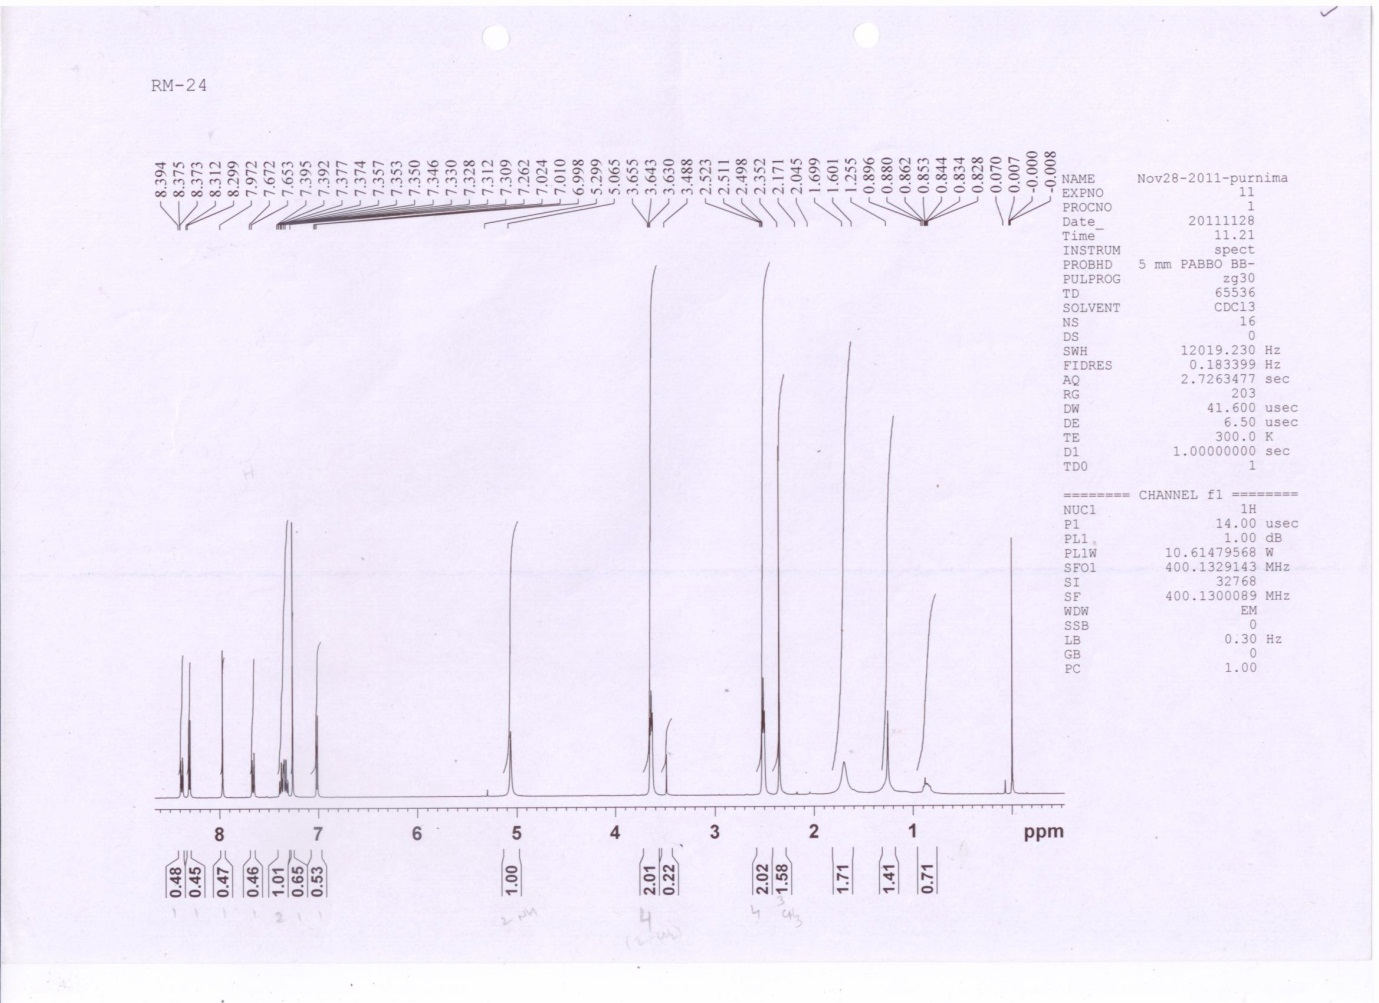
**

**
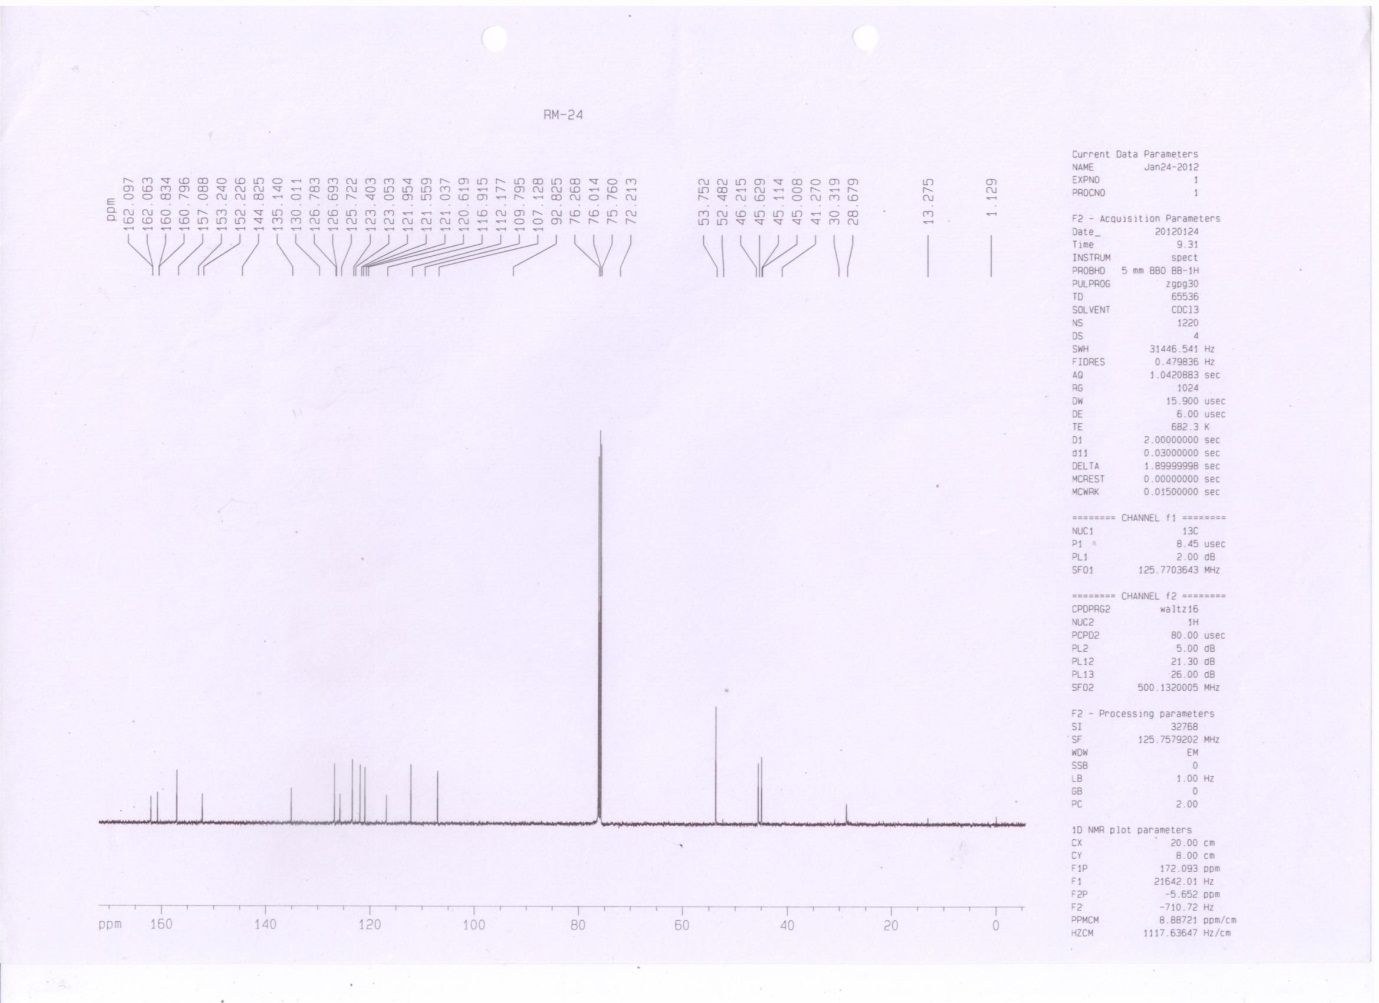
**

**
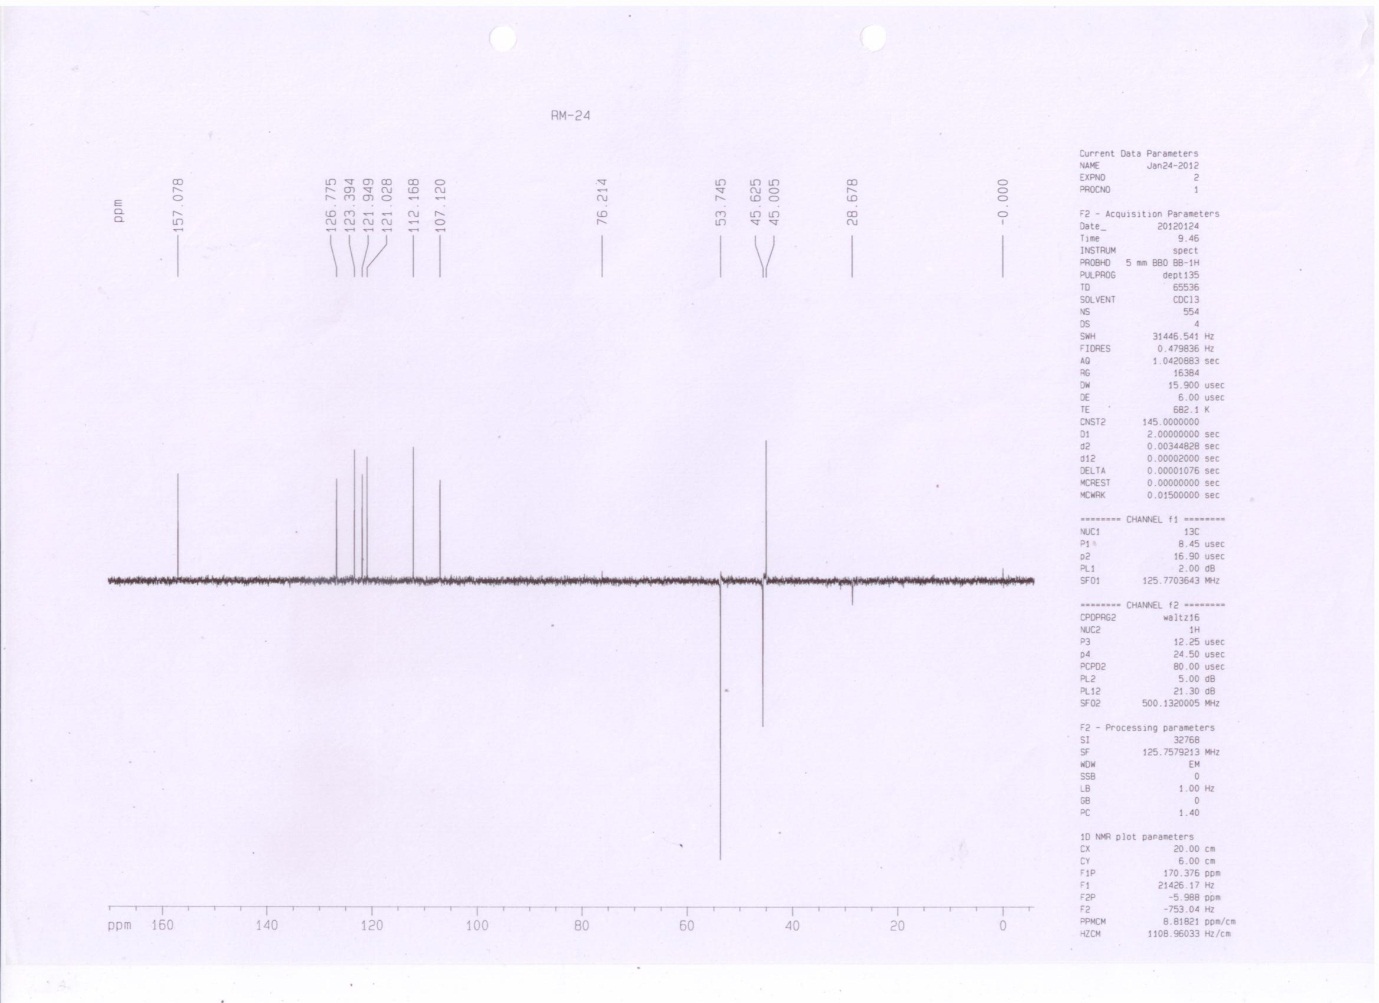
**

S2.7. 1H, 13C and DEPT135 NMR spectra of (3-(2-aminopyrimidin-4-yl)-5-bromo-1H-indol-1-yl)(4-methylpiperazin-1-yl)methanone (**17d**)

**
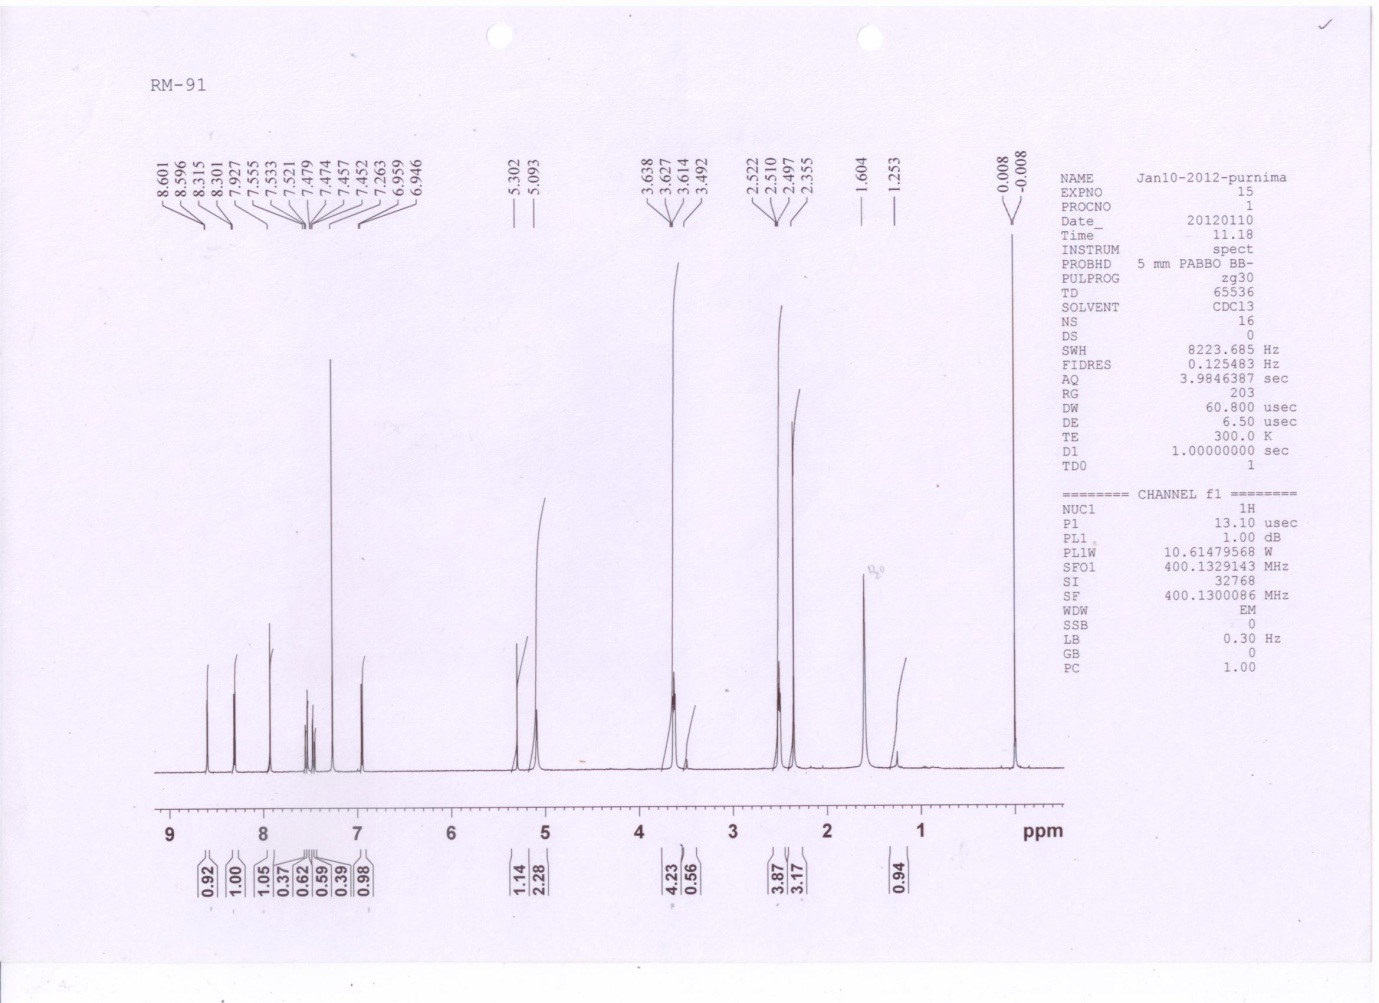
**

**
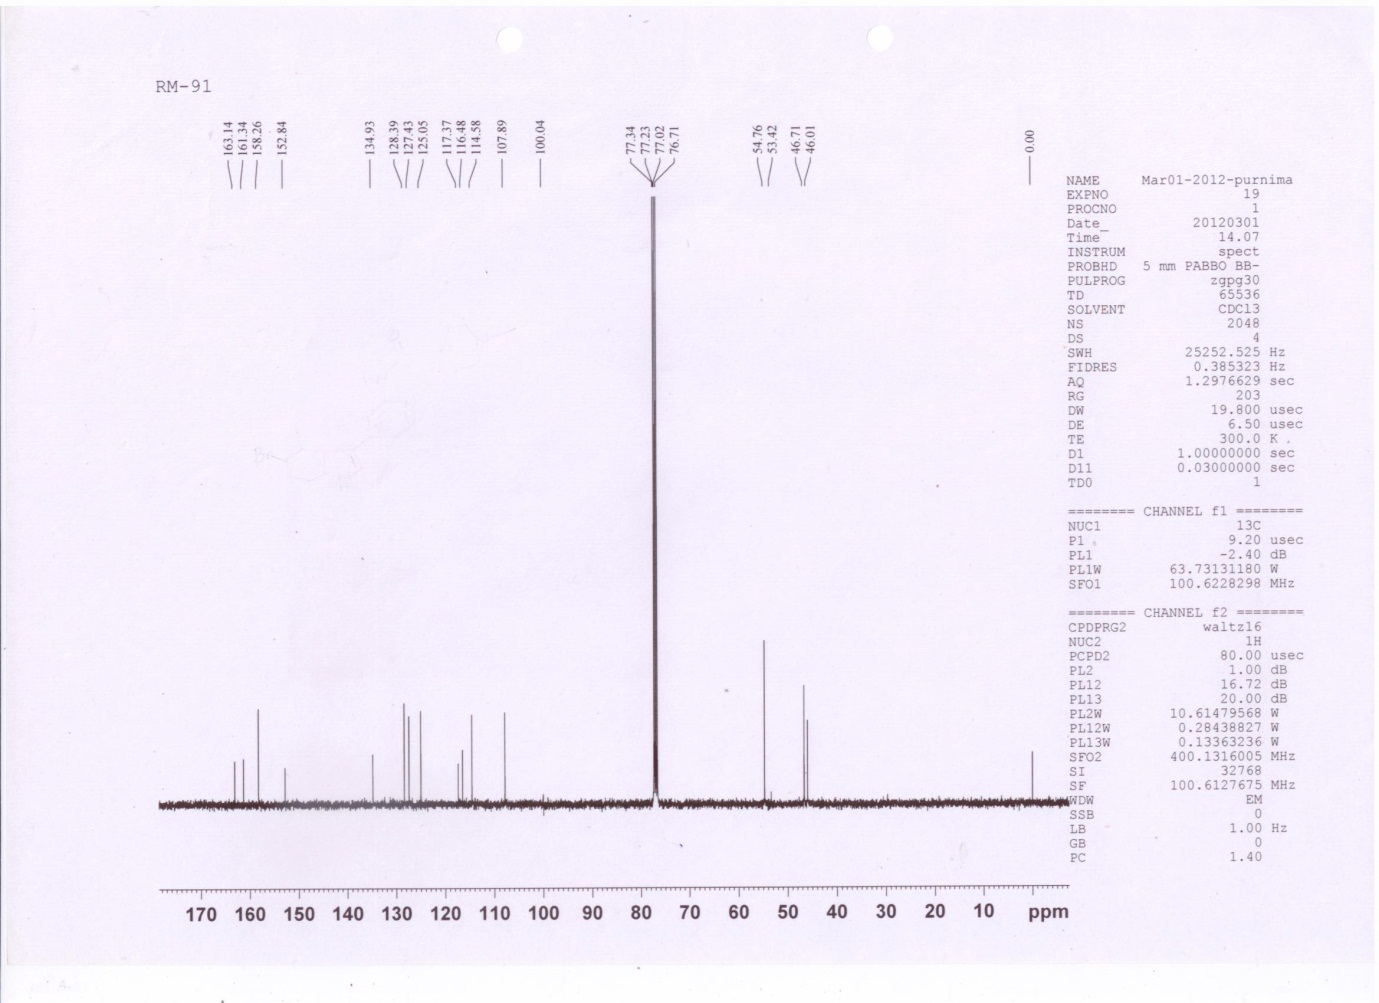
**

**
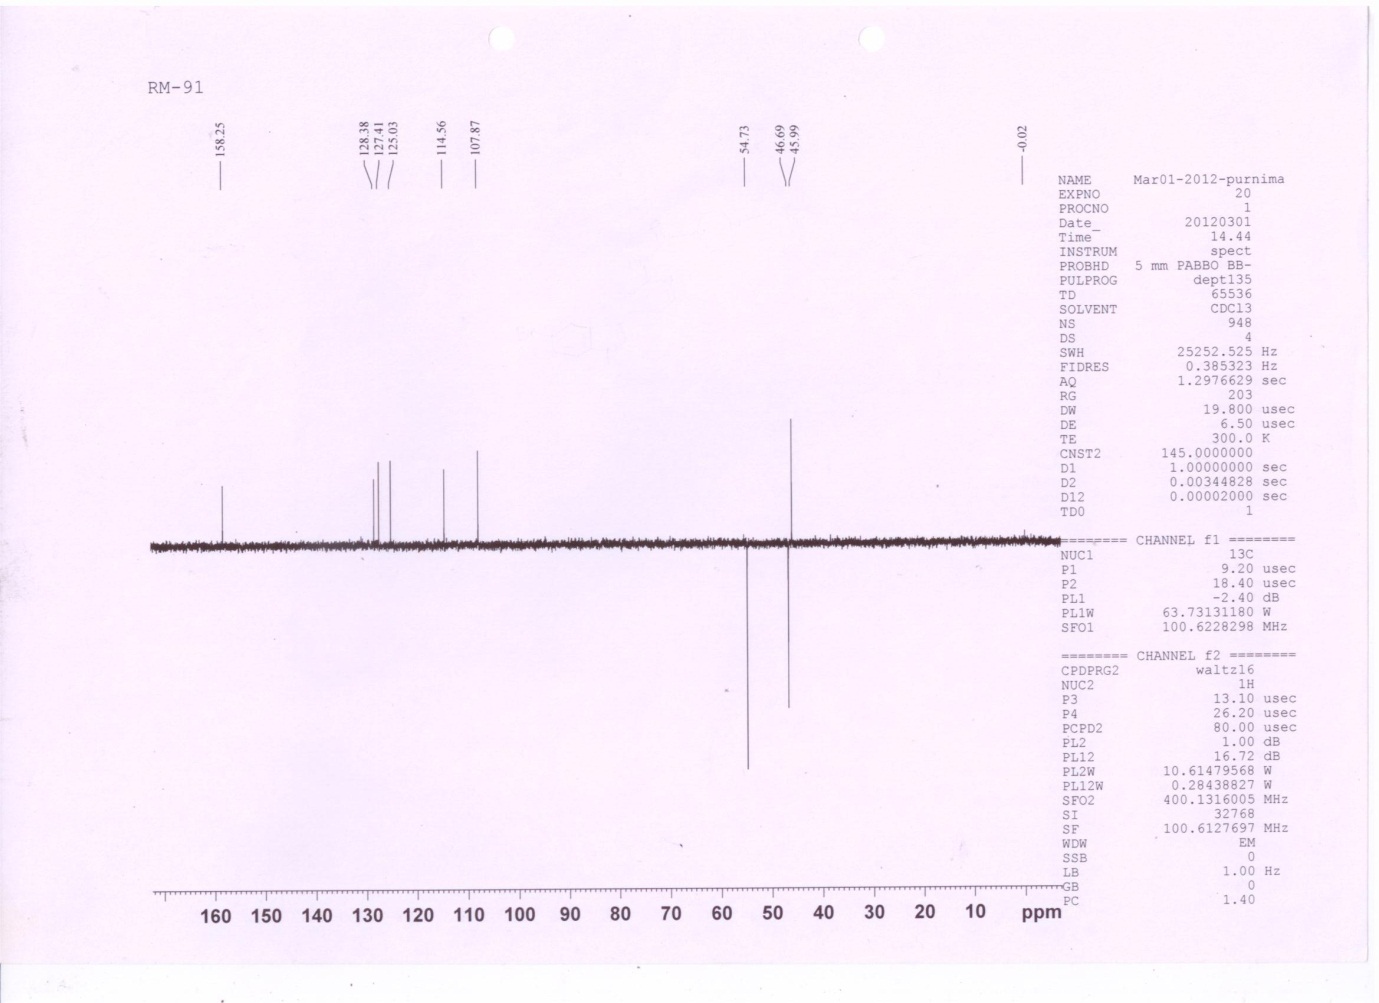
**

S2.8. 1H, 13C and DEPT135 NMR spectra of (3-(2-aminopyrimidin-4-yl)-1H-indol-1-yl)(phenyl)methanone (**17e**) **
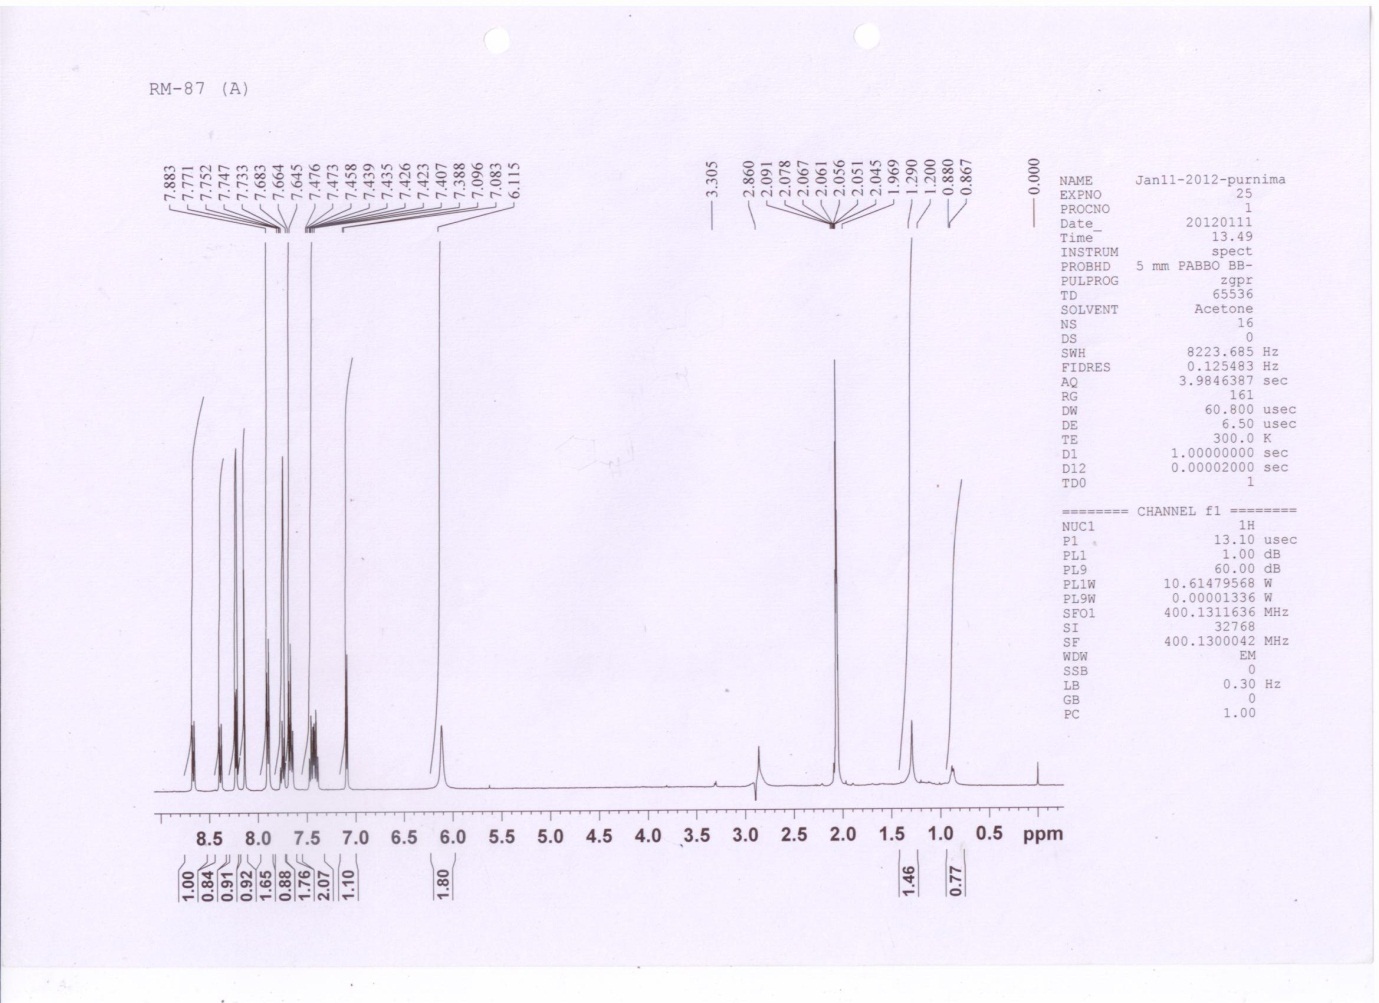

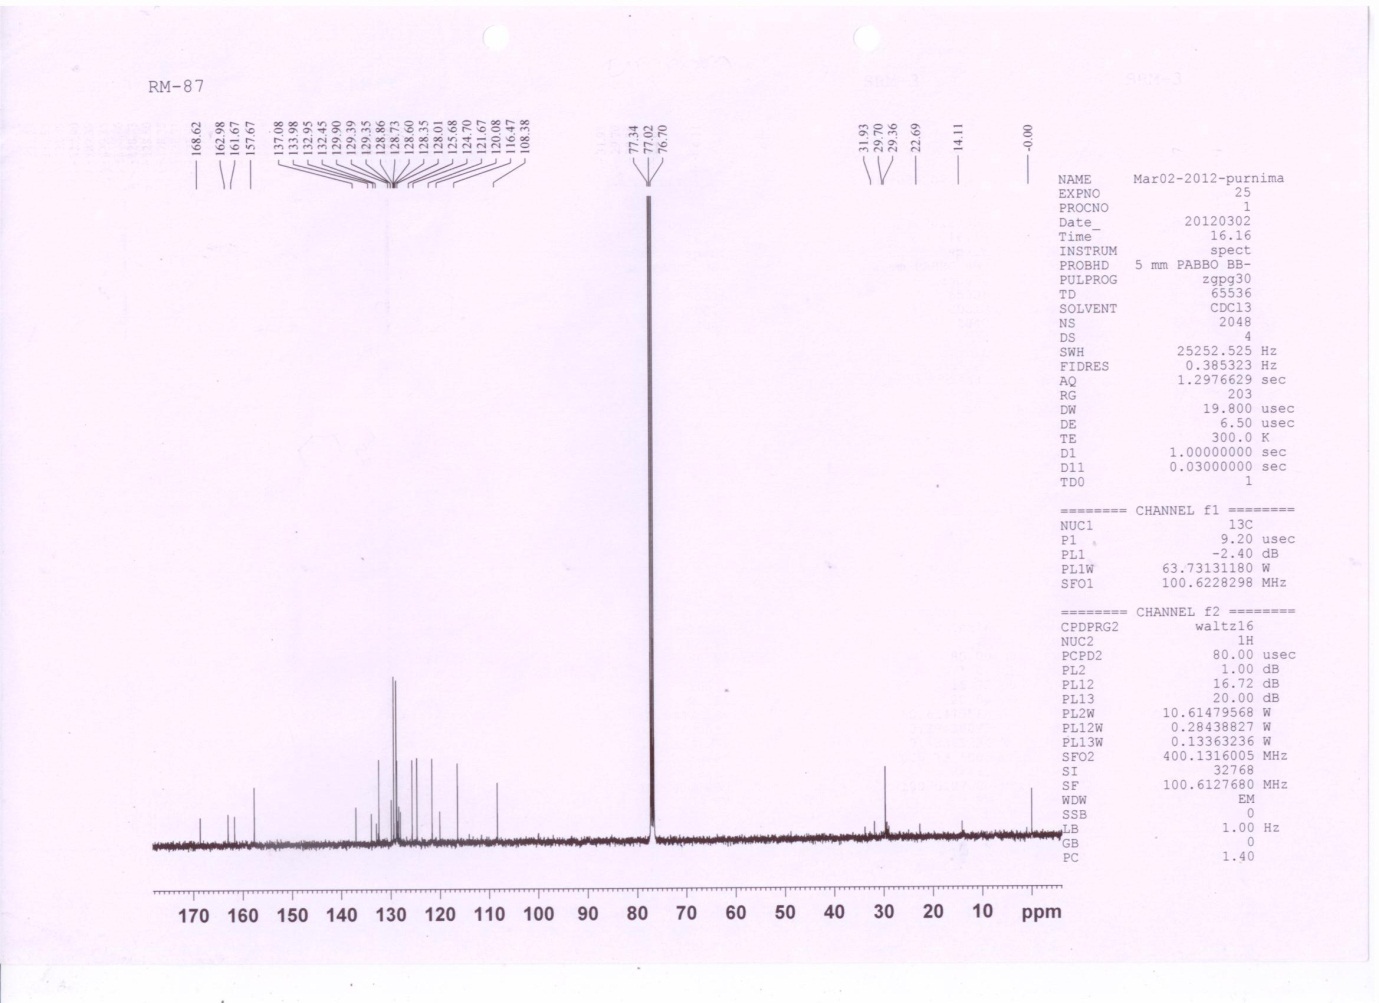
**

**
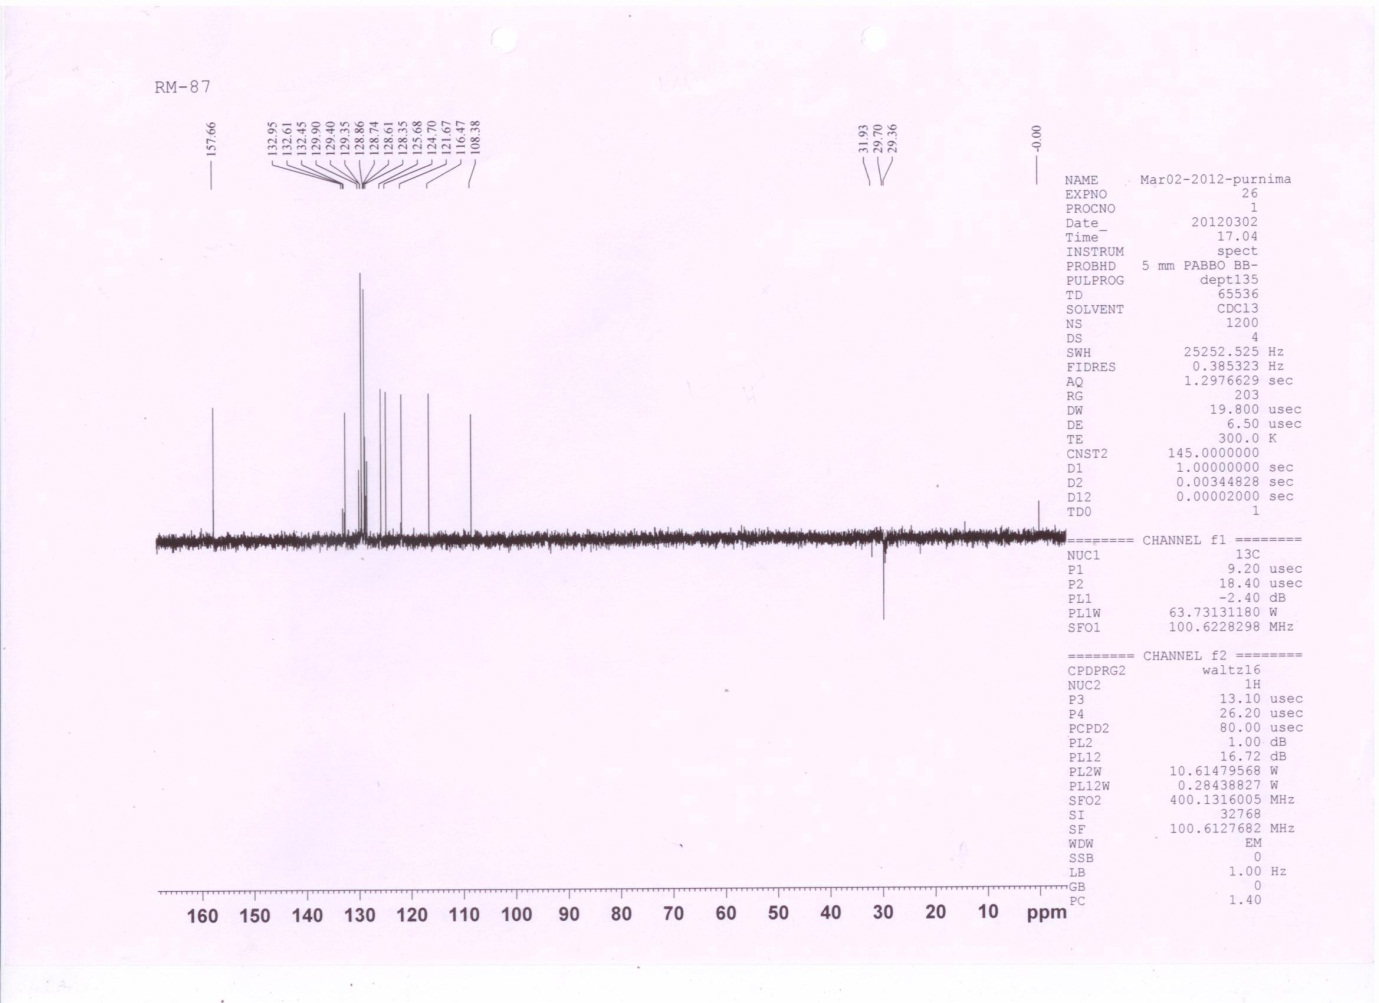
**

S2.9. 1H, 13C and DEPT135 NMR spectra of (3-(2-aminopyrimidin-4-yl)-5-bromo-1H-indol-1-yl)(phenyl)methanone (**17f**)

**
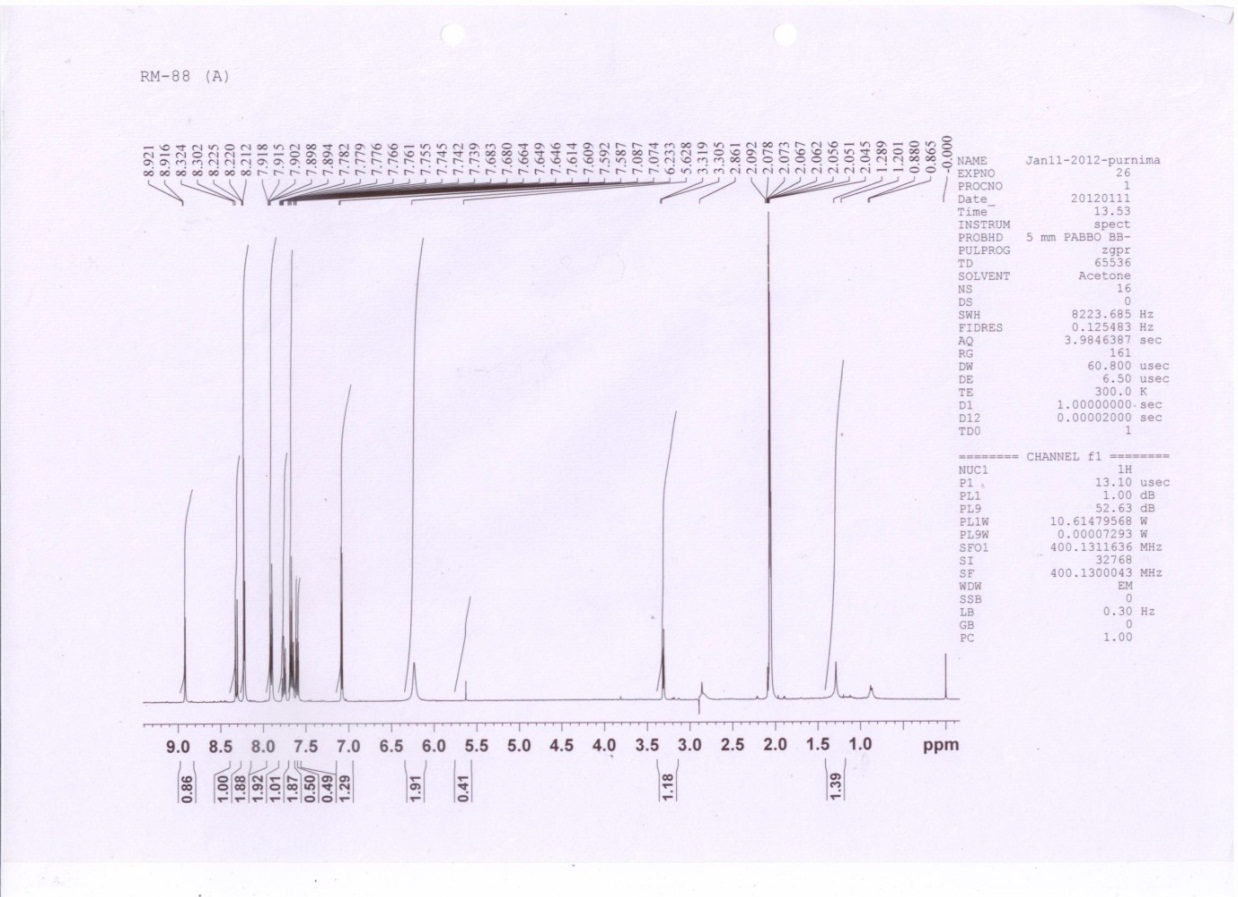
**

**
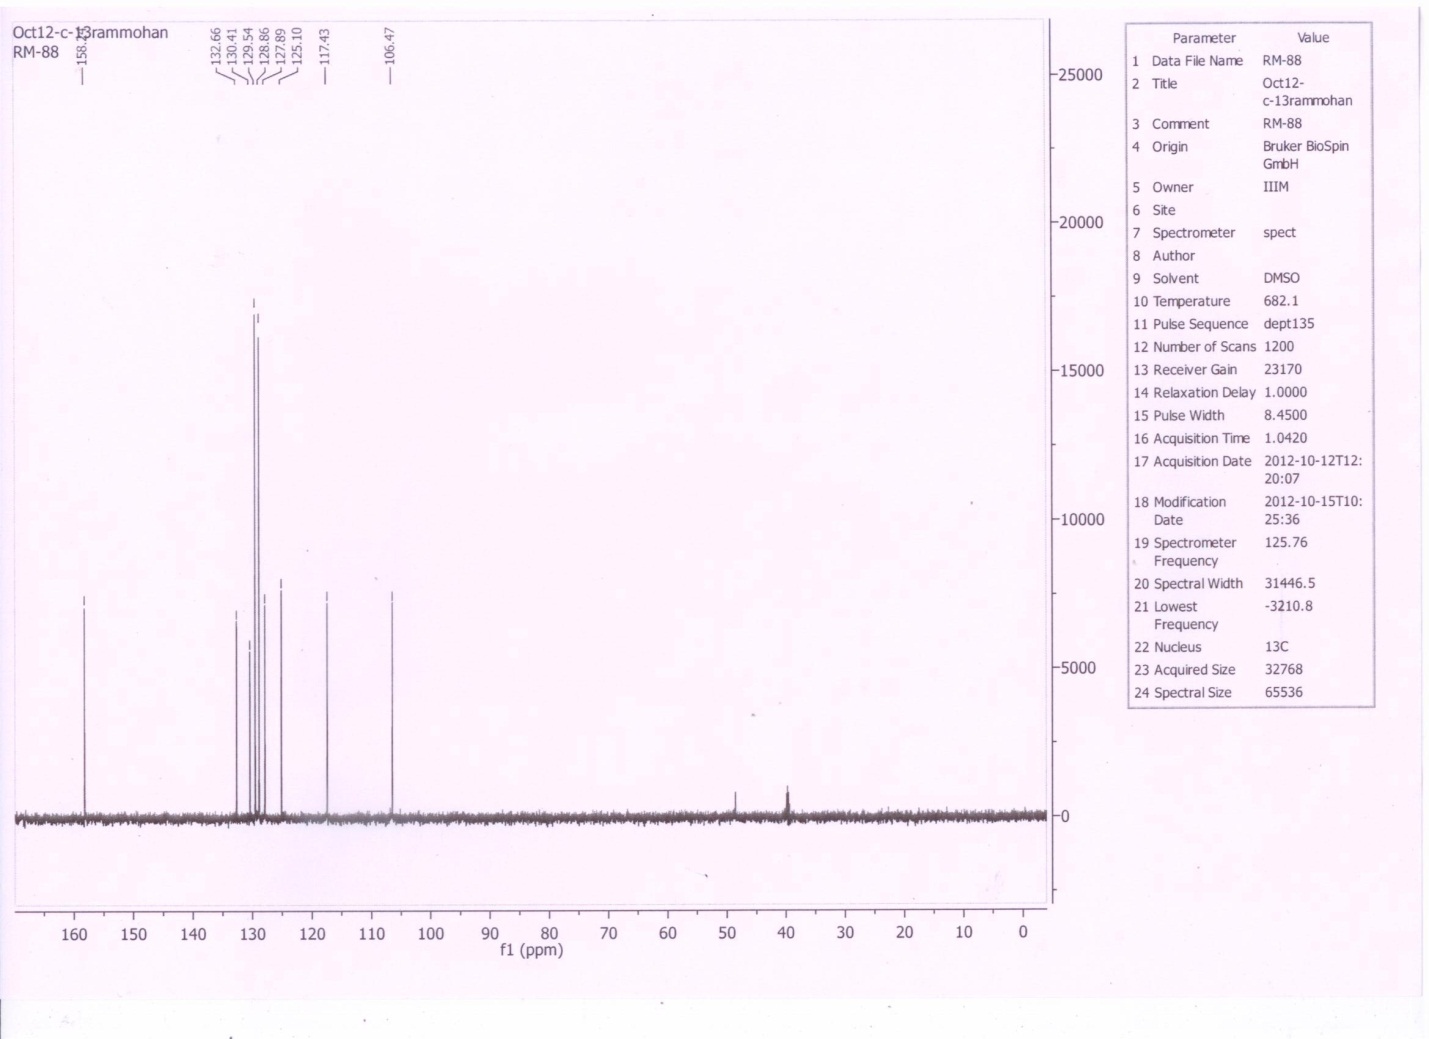

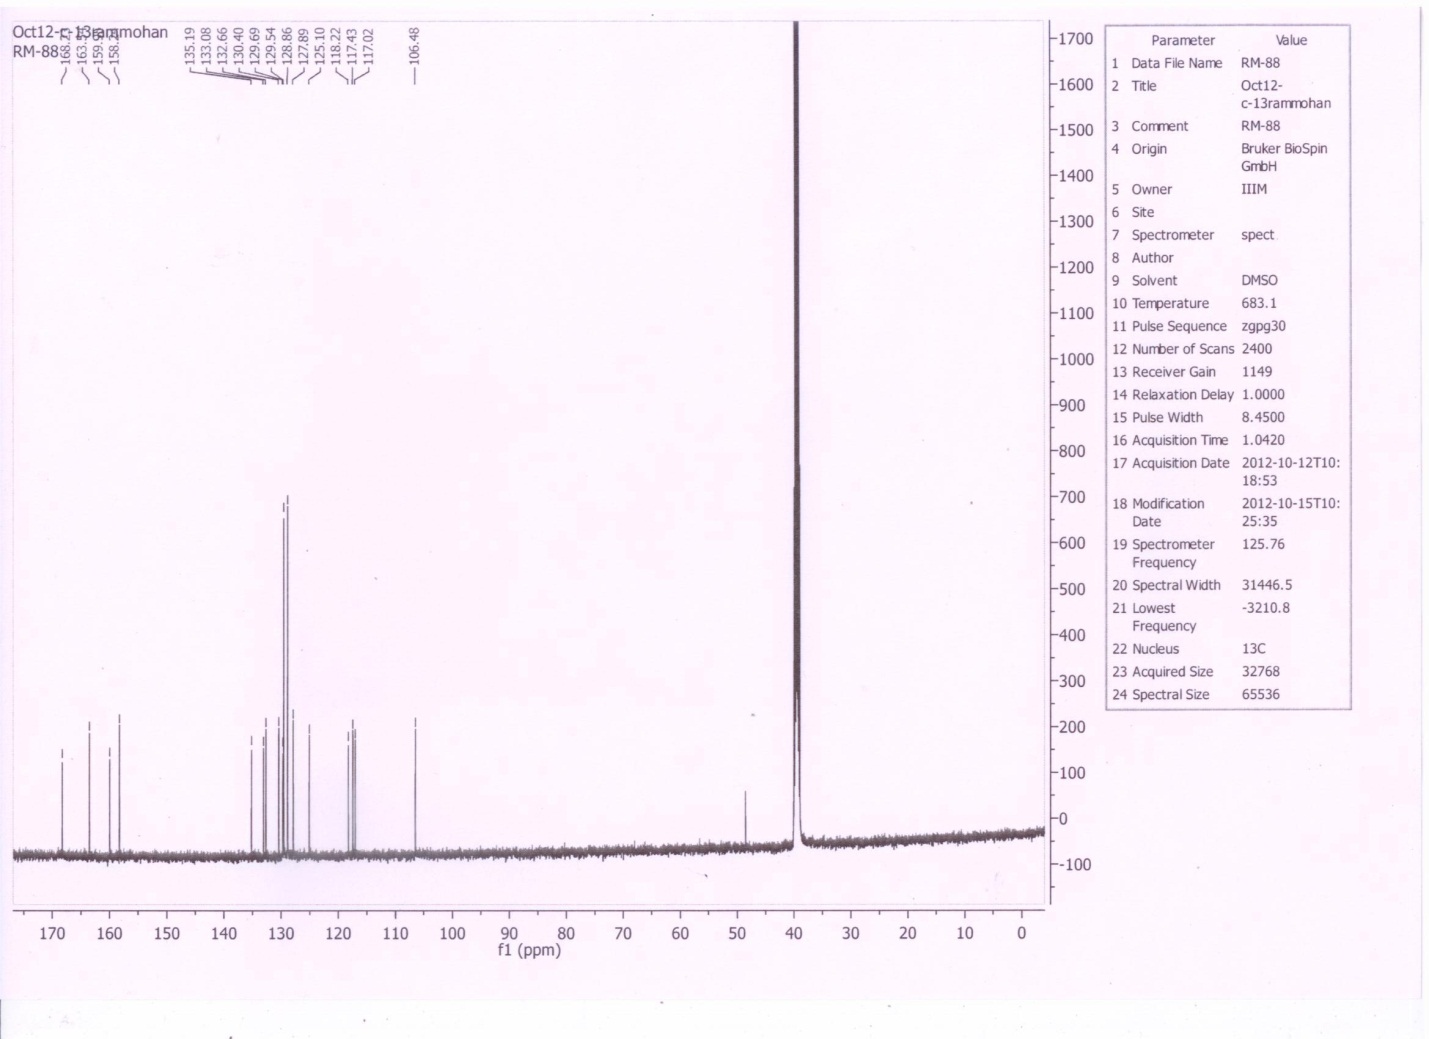
**

S2.10. 1H, 13C and DEPT135 NMR spectra of N-(4-(1H-indol-3-yl)pyrimidin-2-yl)-3-methoxybenzamide (**17g**)

**
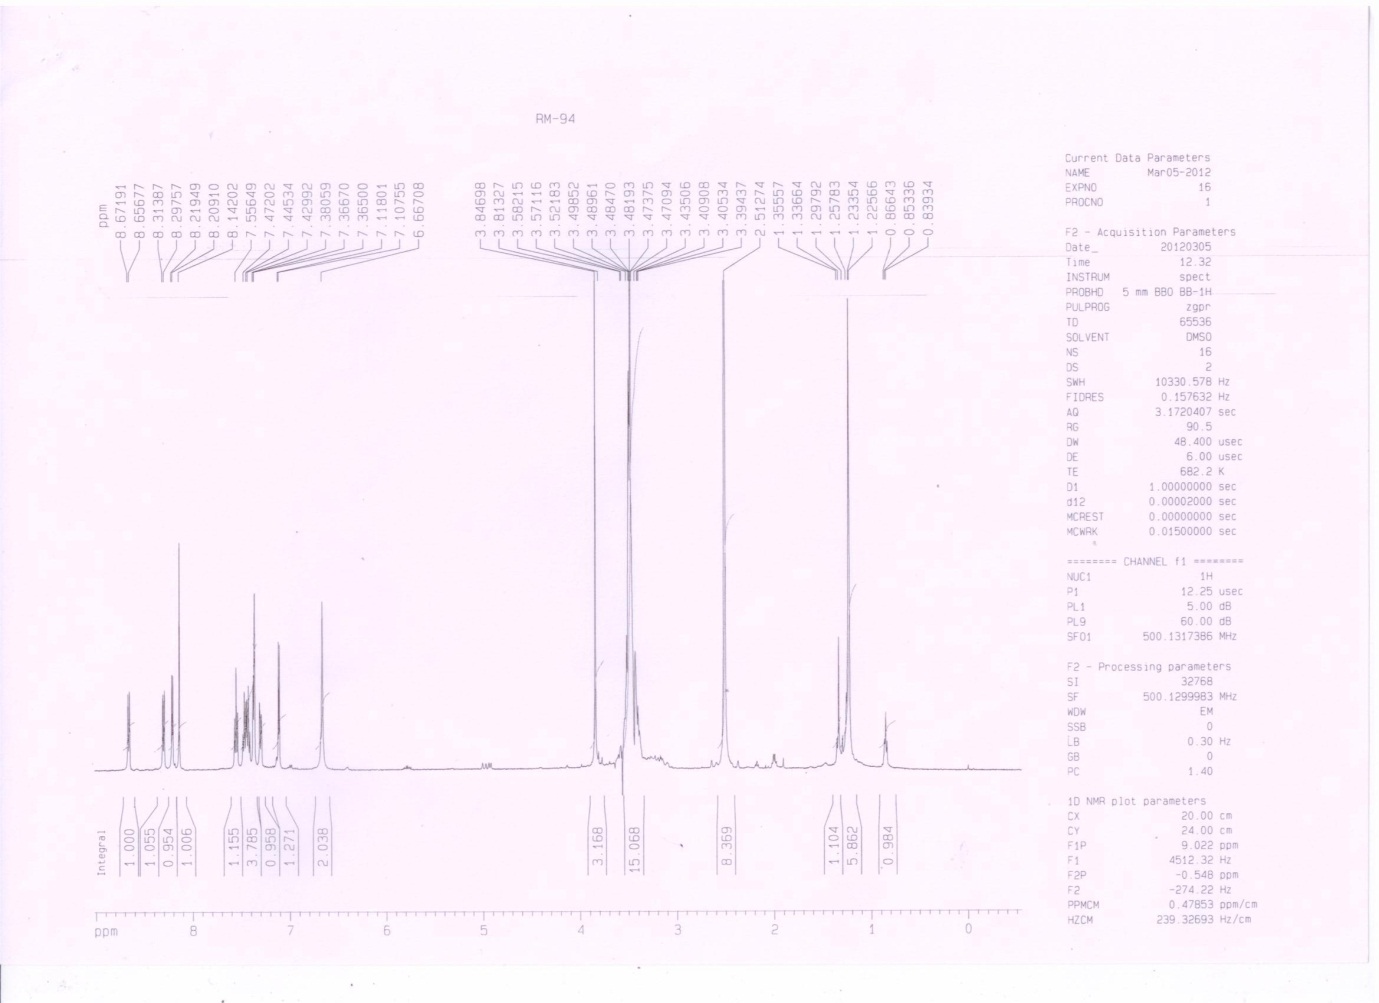
**

**
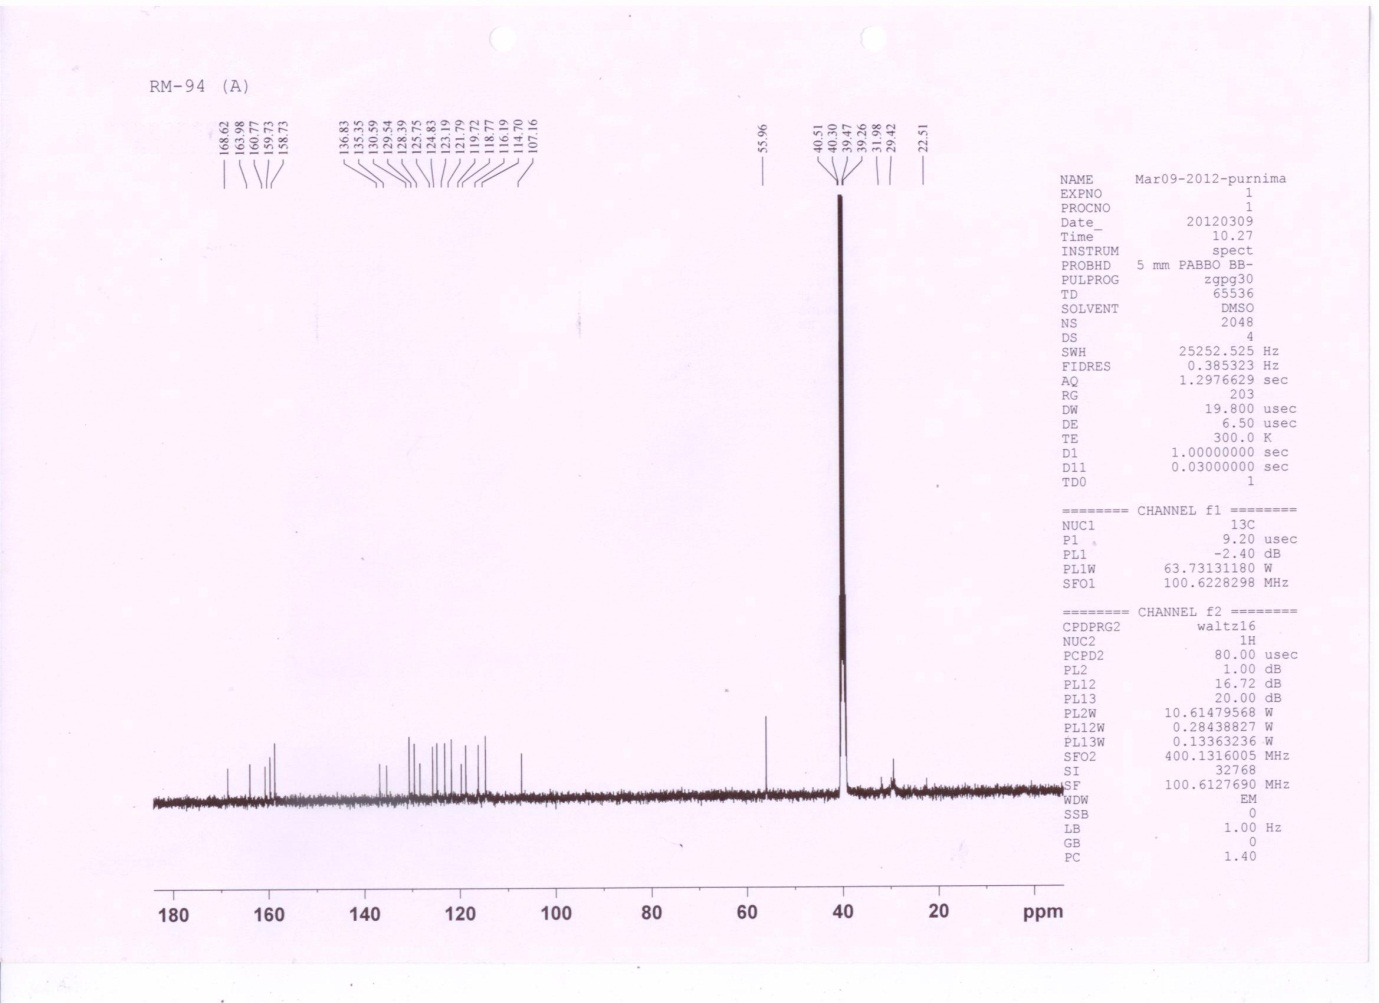
**

**
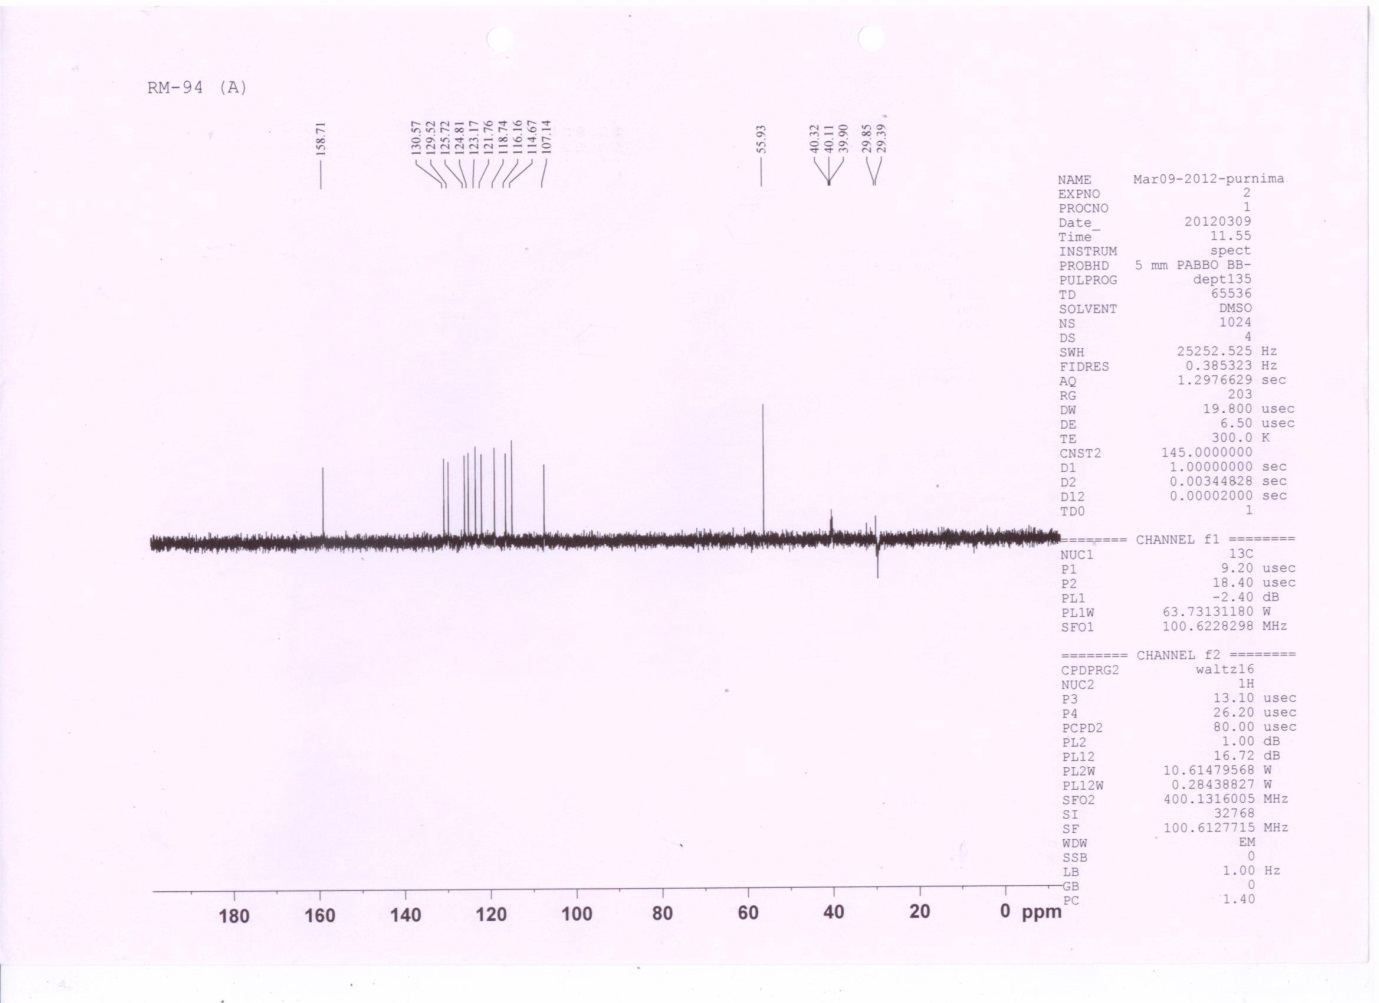
**

S2.11. 1H, 13C and DEPT135 NMR spectra of (3-(2-aminopyrimidin-4-yl)-1H-indol-1-yl)(2-ethoxyphenyl)methanone (**17h**)

**
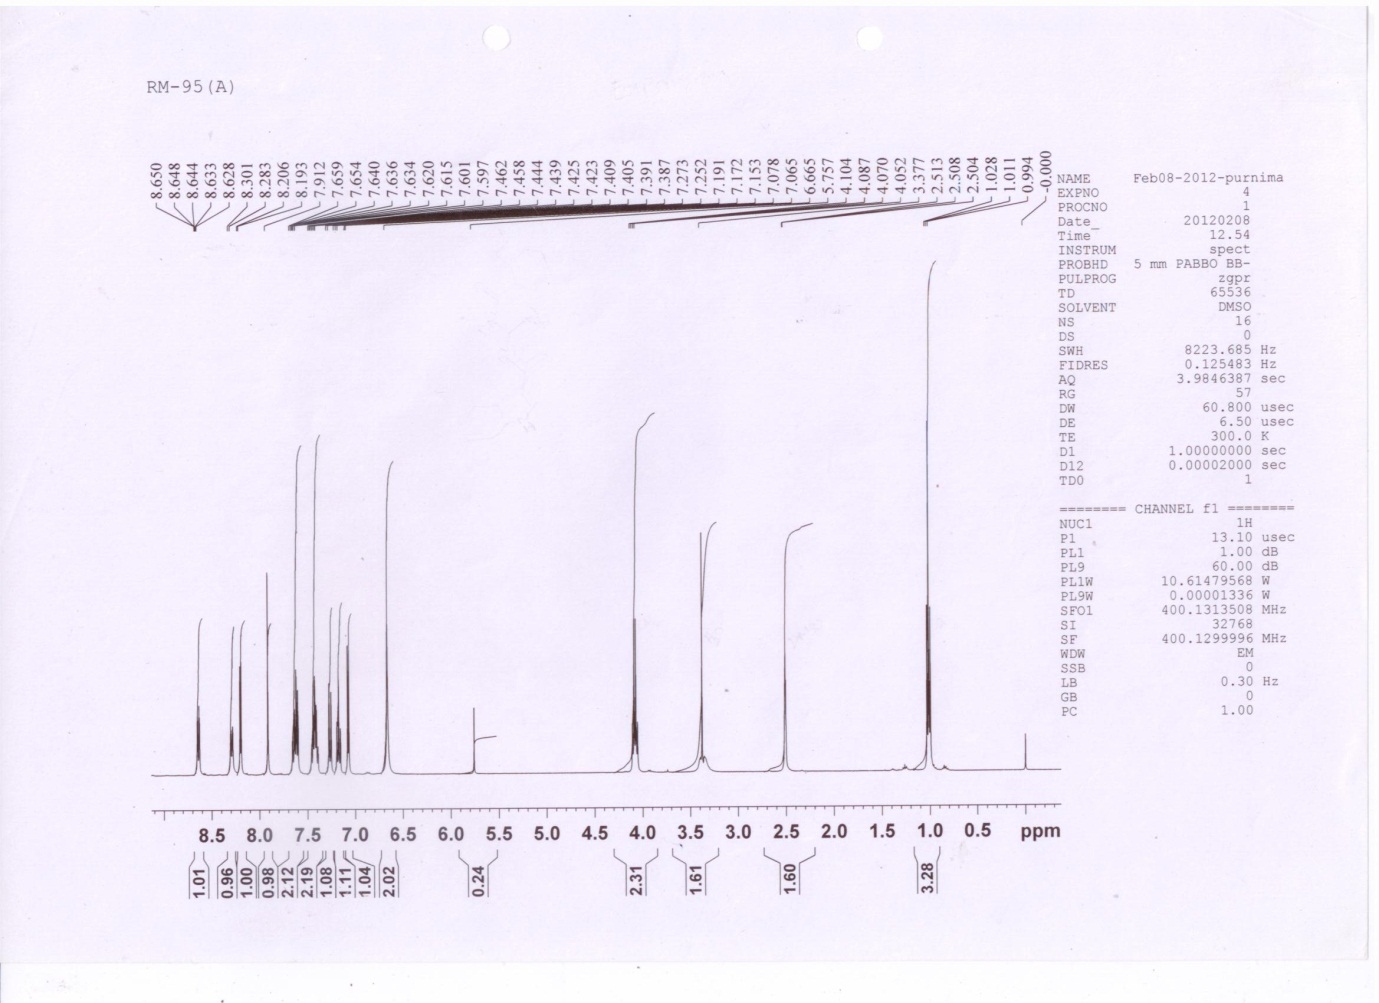
**

**
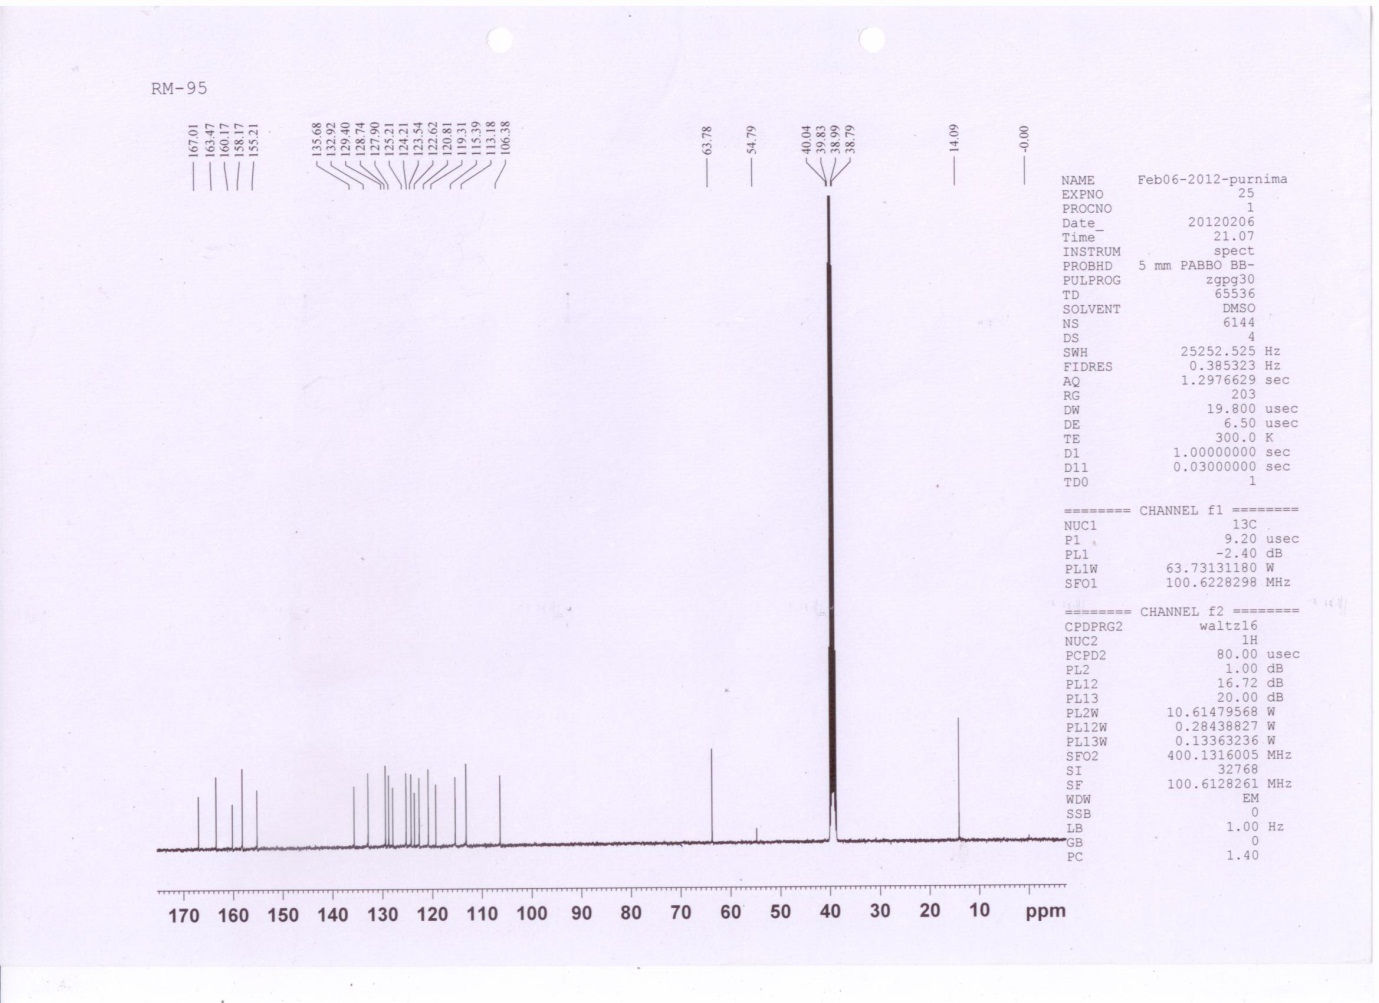
**

**
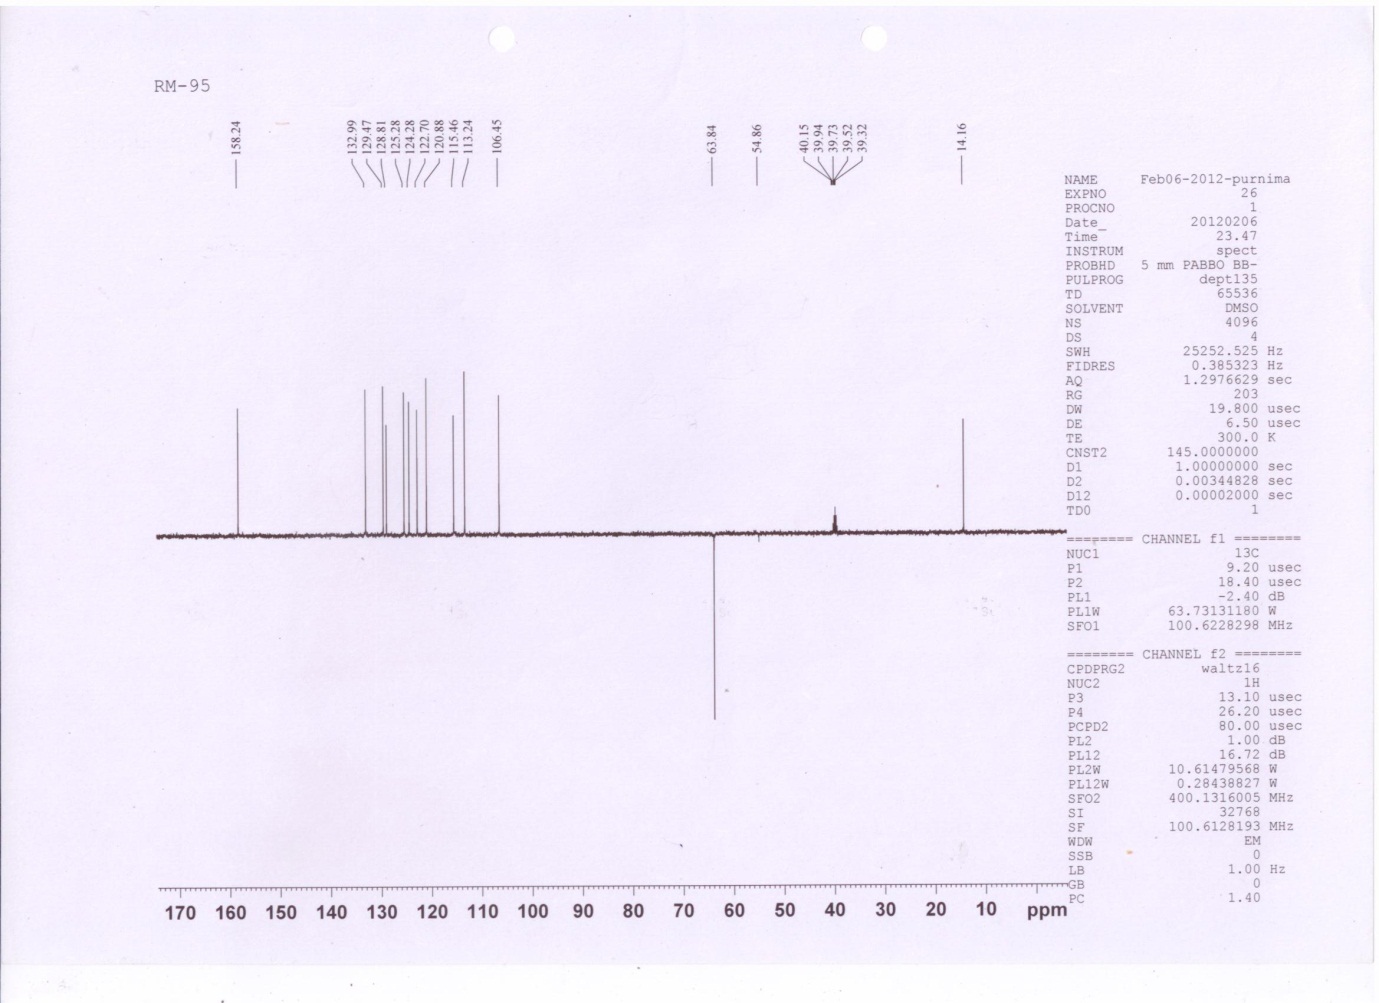
**

S2.12. 1H, 13C and DEPT135 NMR spectra of 4-(1-((3,5-dimethylisoxazol-4-yl)methyl)-1H-indol-3-yl)pyrimidin-2-amine (**19a**)

**
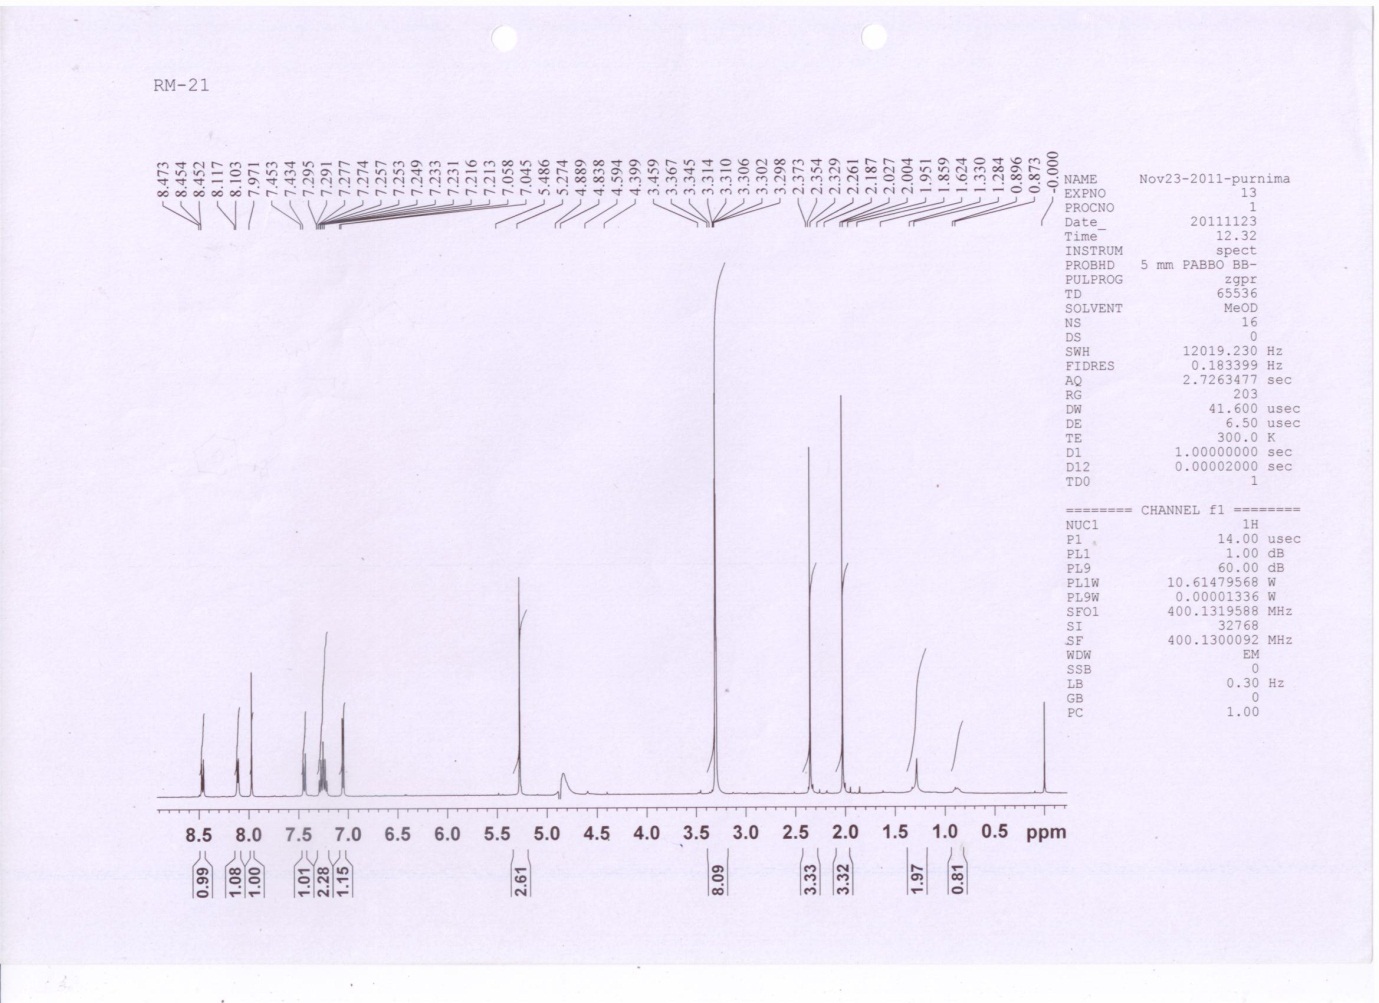
**

**
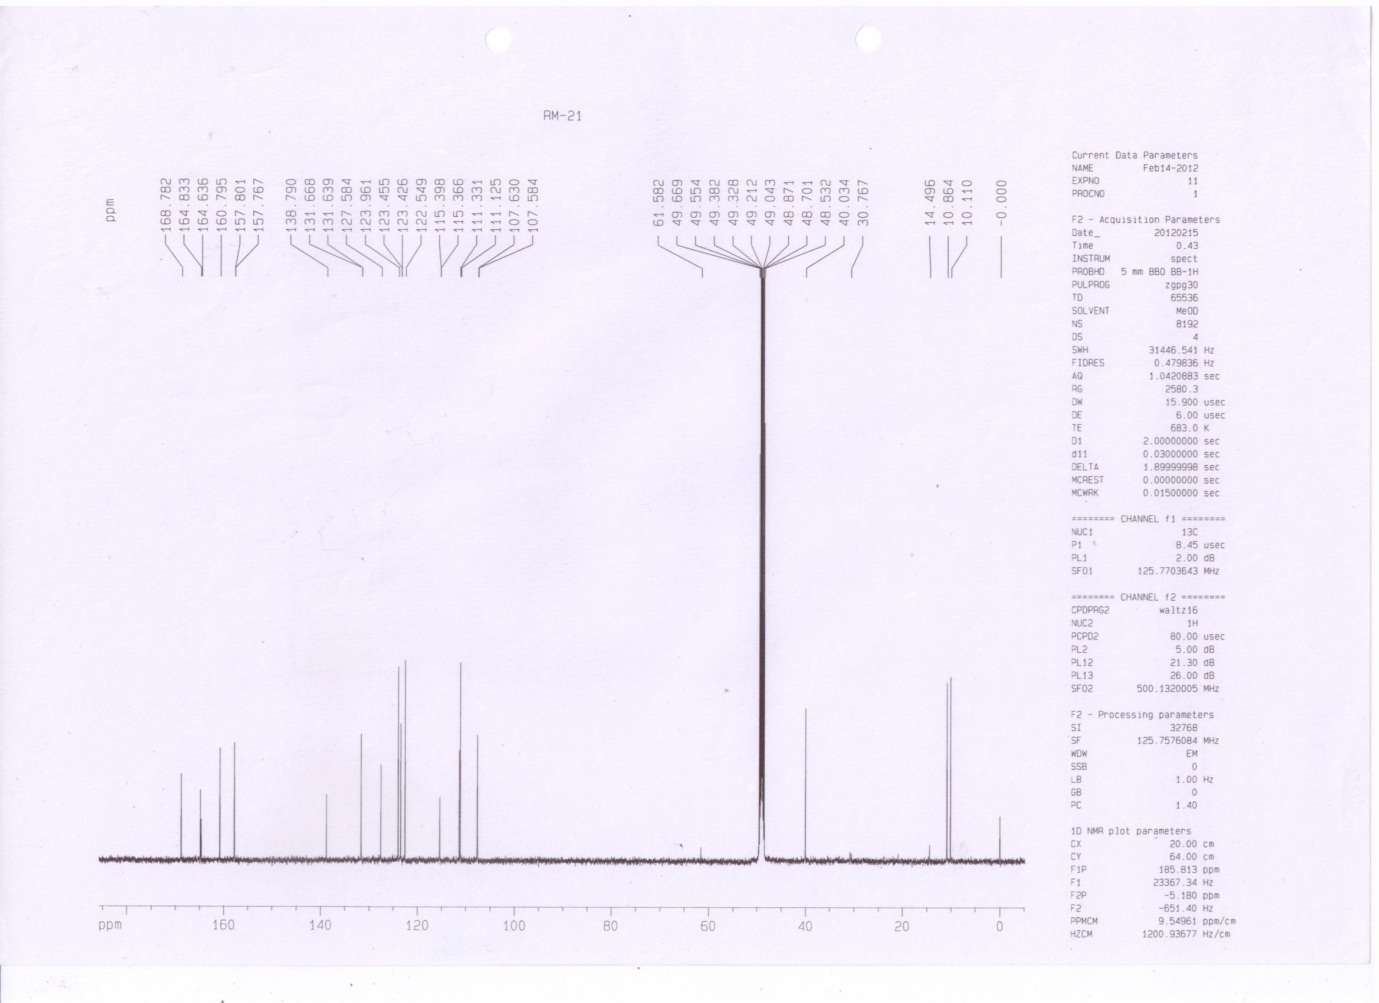
**

**
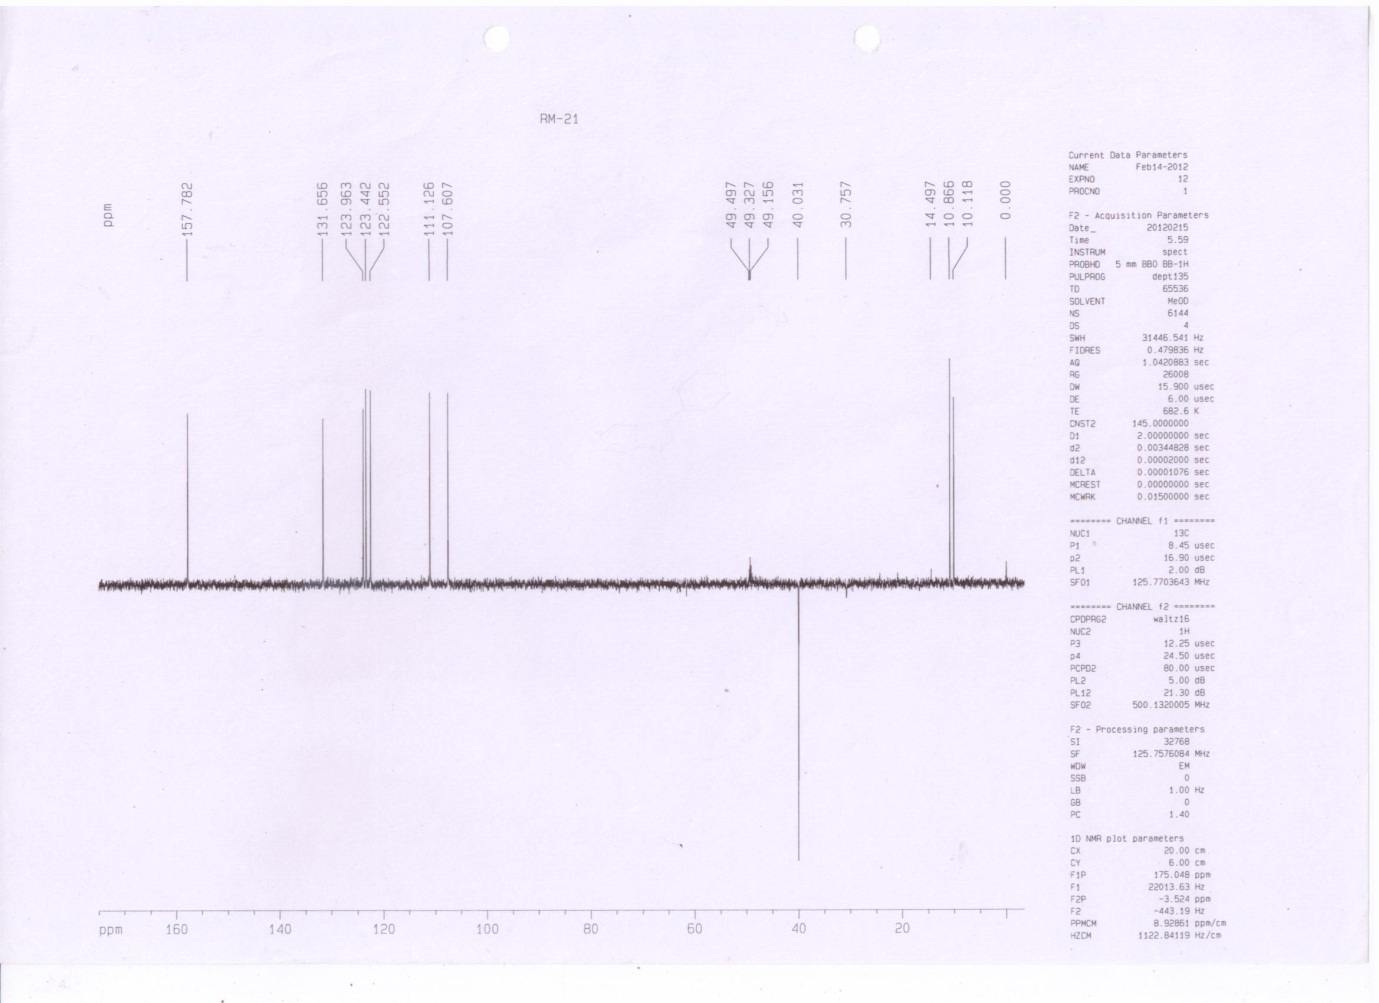
**

S2.13. 1H, 13C and DEPT135 NMR spectra of 4-(5-bromo-1H-indol-3-yl)-N-((3,5-dimethylisoxazol-4-yl)methyl) pyrimidin-2-amine (**19b**)

**
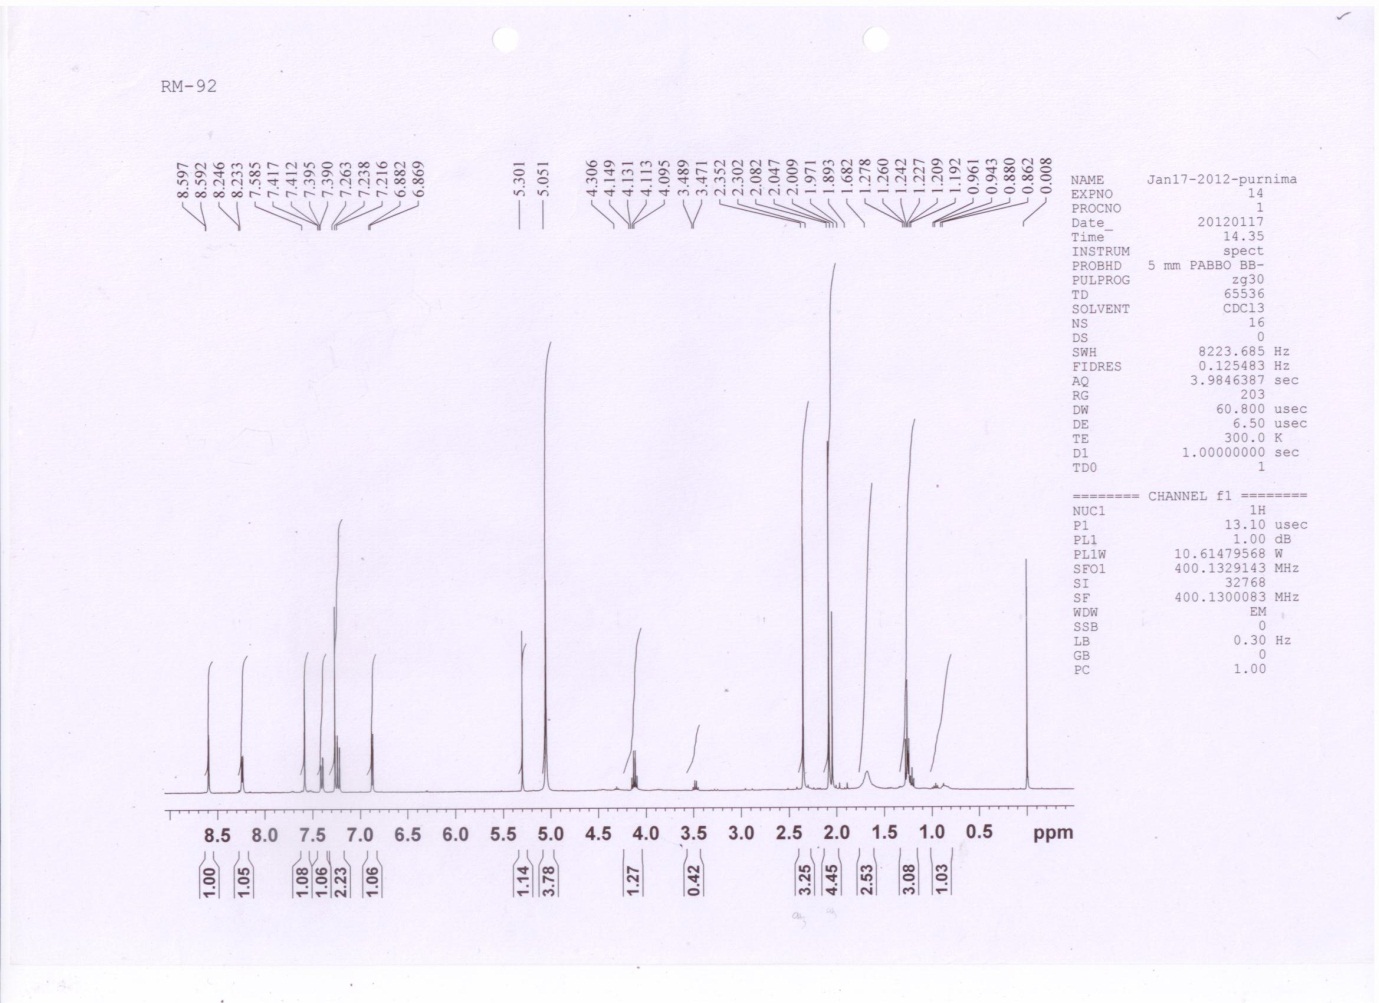
**

**
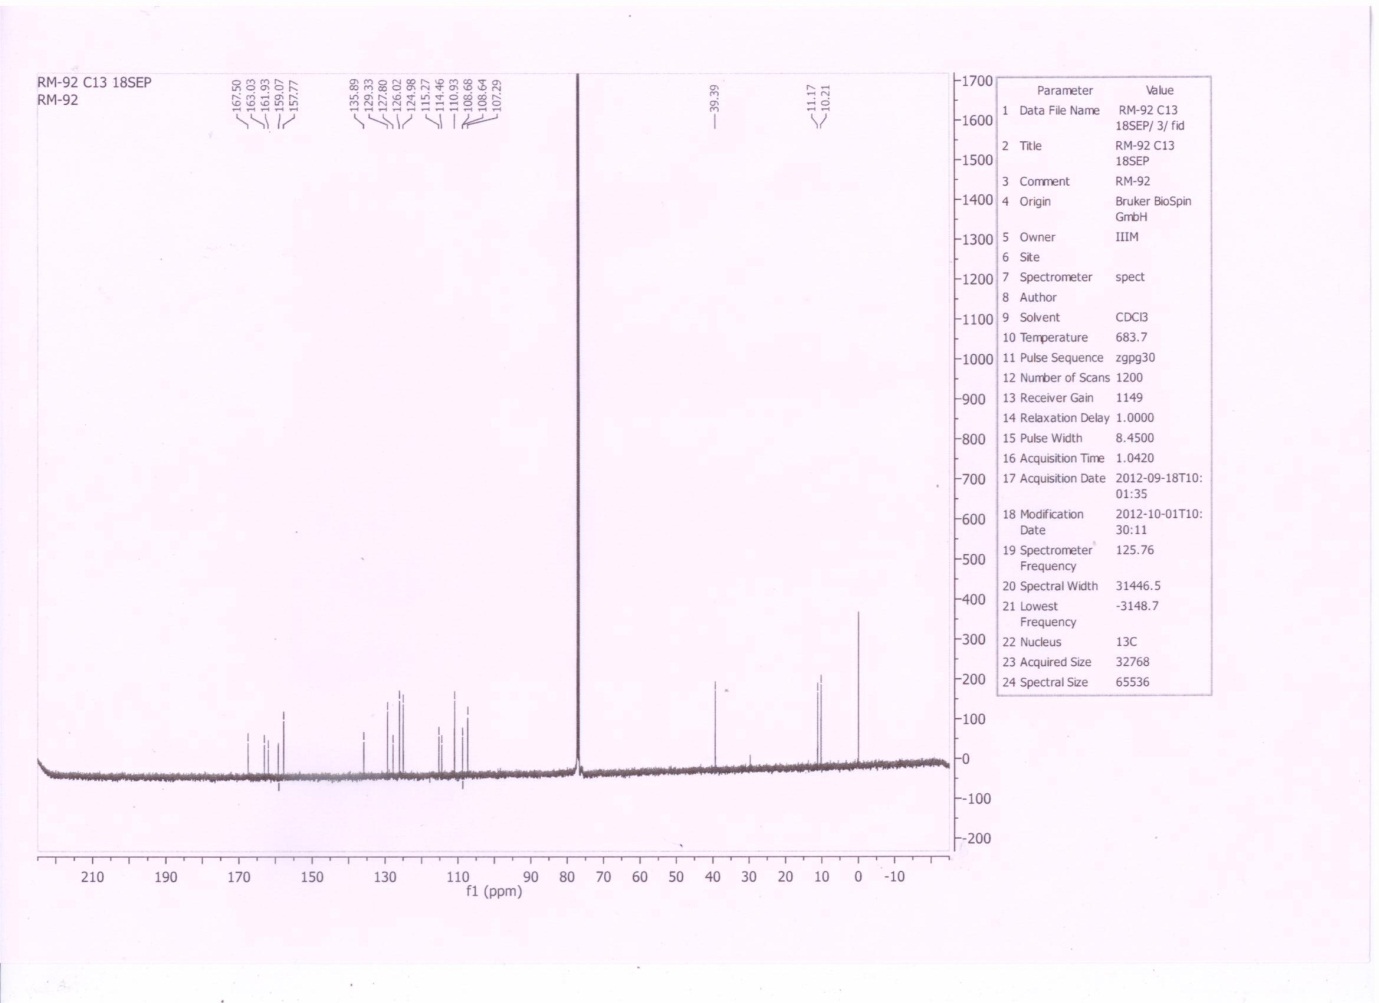

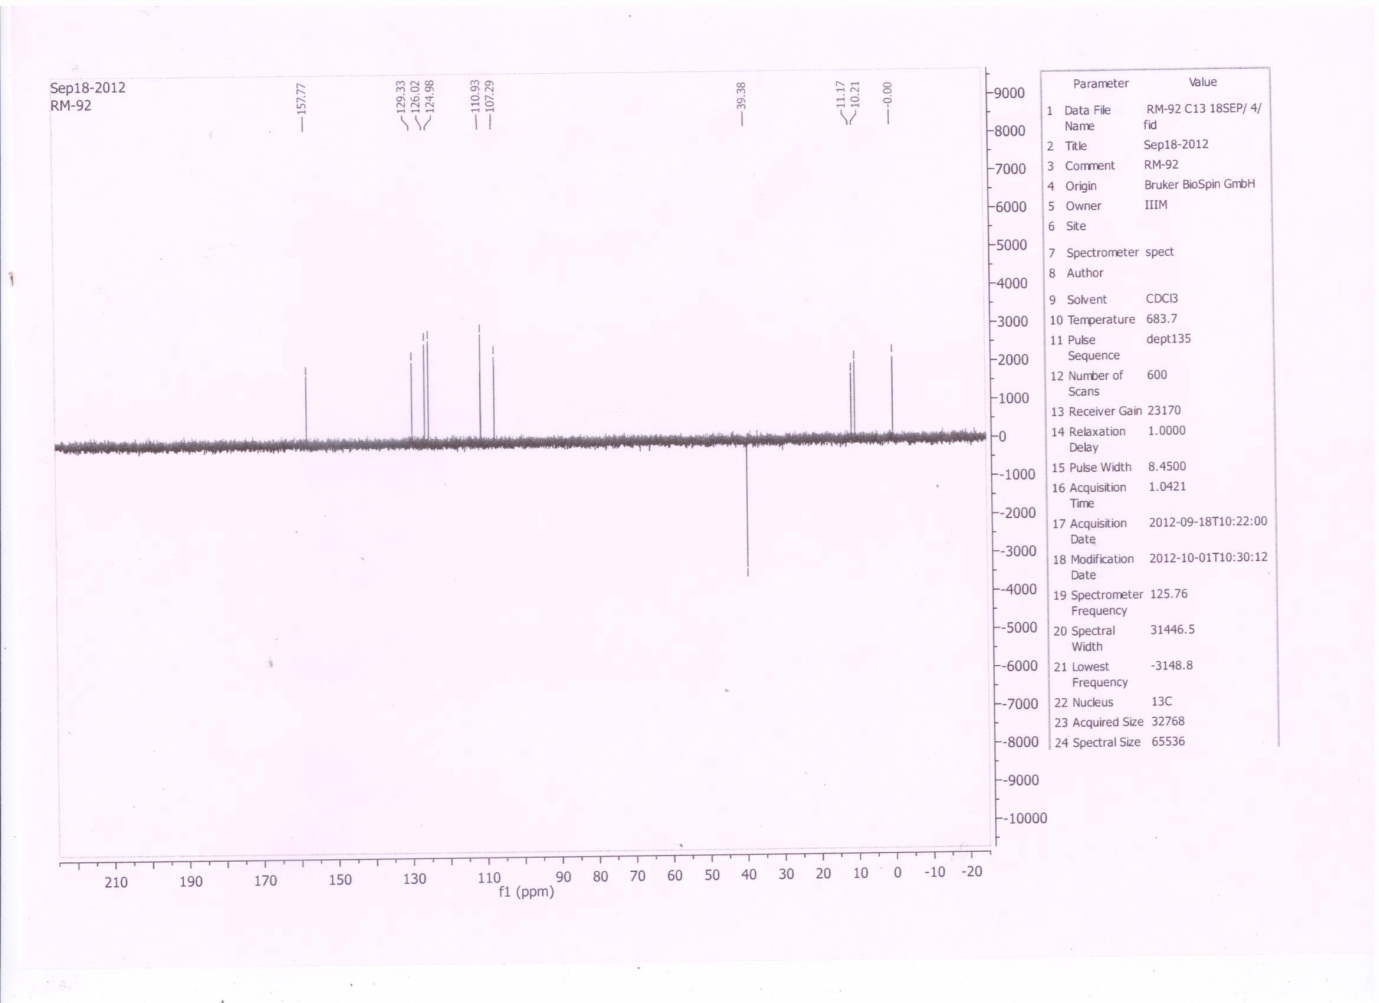
**

S2.14. 1H, 13C and DEPT135 NMR spectra of 4-(1-((5-chlorothiophen-2-yl)methyl)-1H-indol-3-yl)pyrimidin-2-amine (**19c**)

**
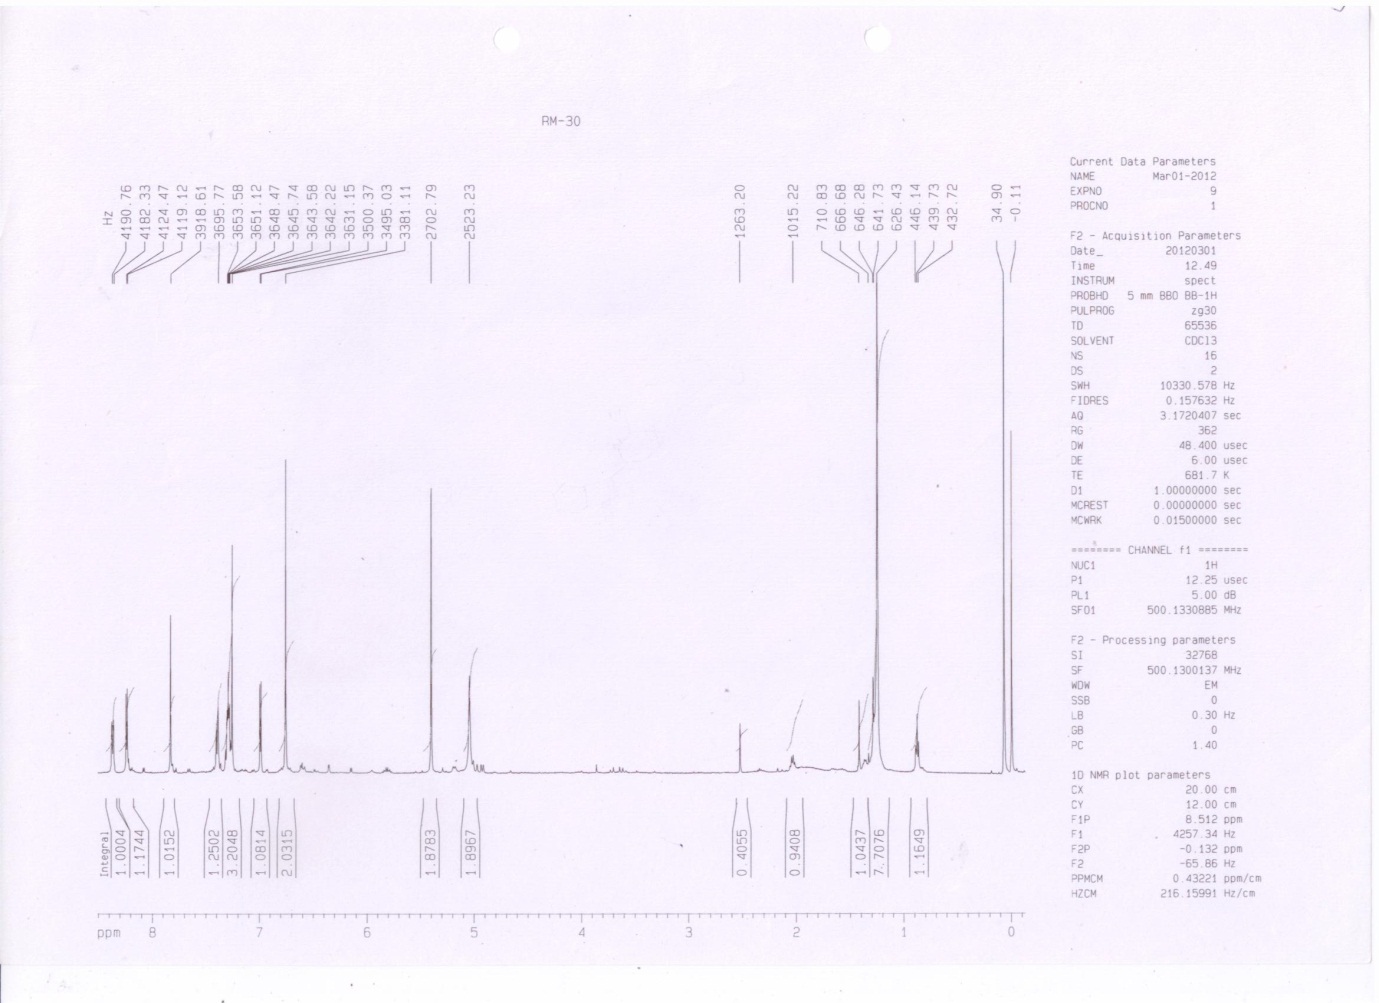

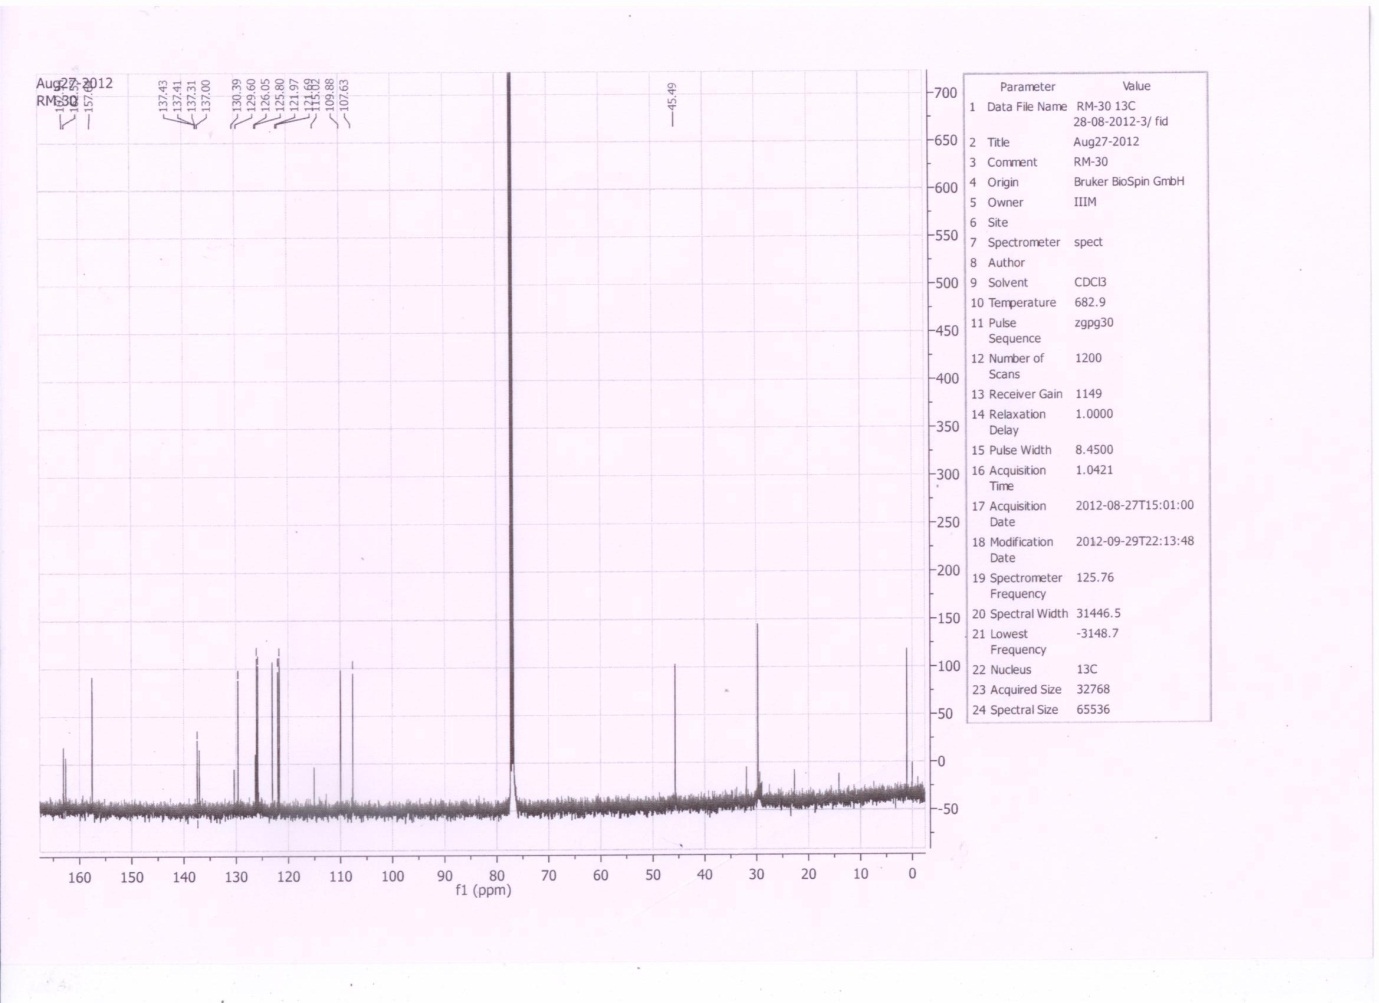
**

**
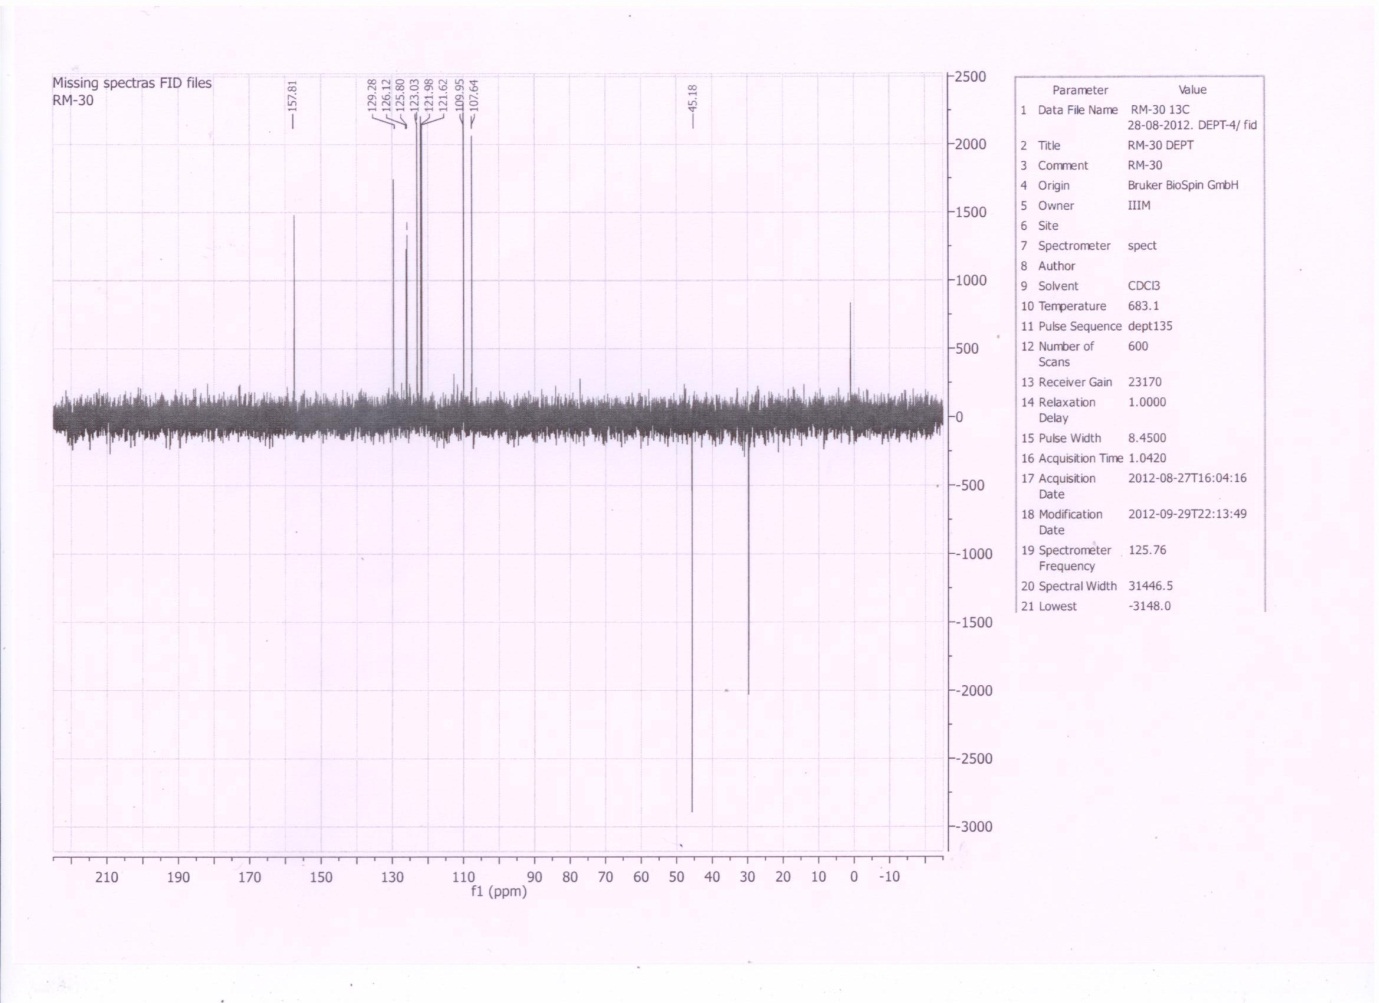
**

S2.15. 1H, 13C and DEPT135 NMR spectra of 4-(5-bromo-1H-indol-3-yl)-N-((5-chlorothiophen-2-yl)methyl)pyrimidin-2-amine (**19d**)

**
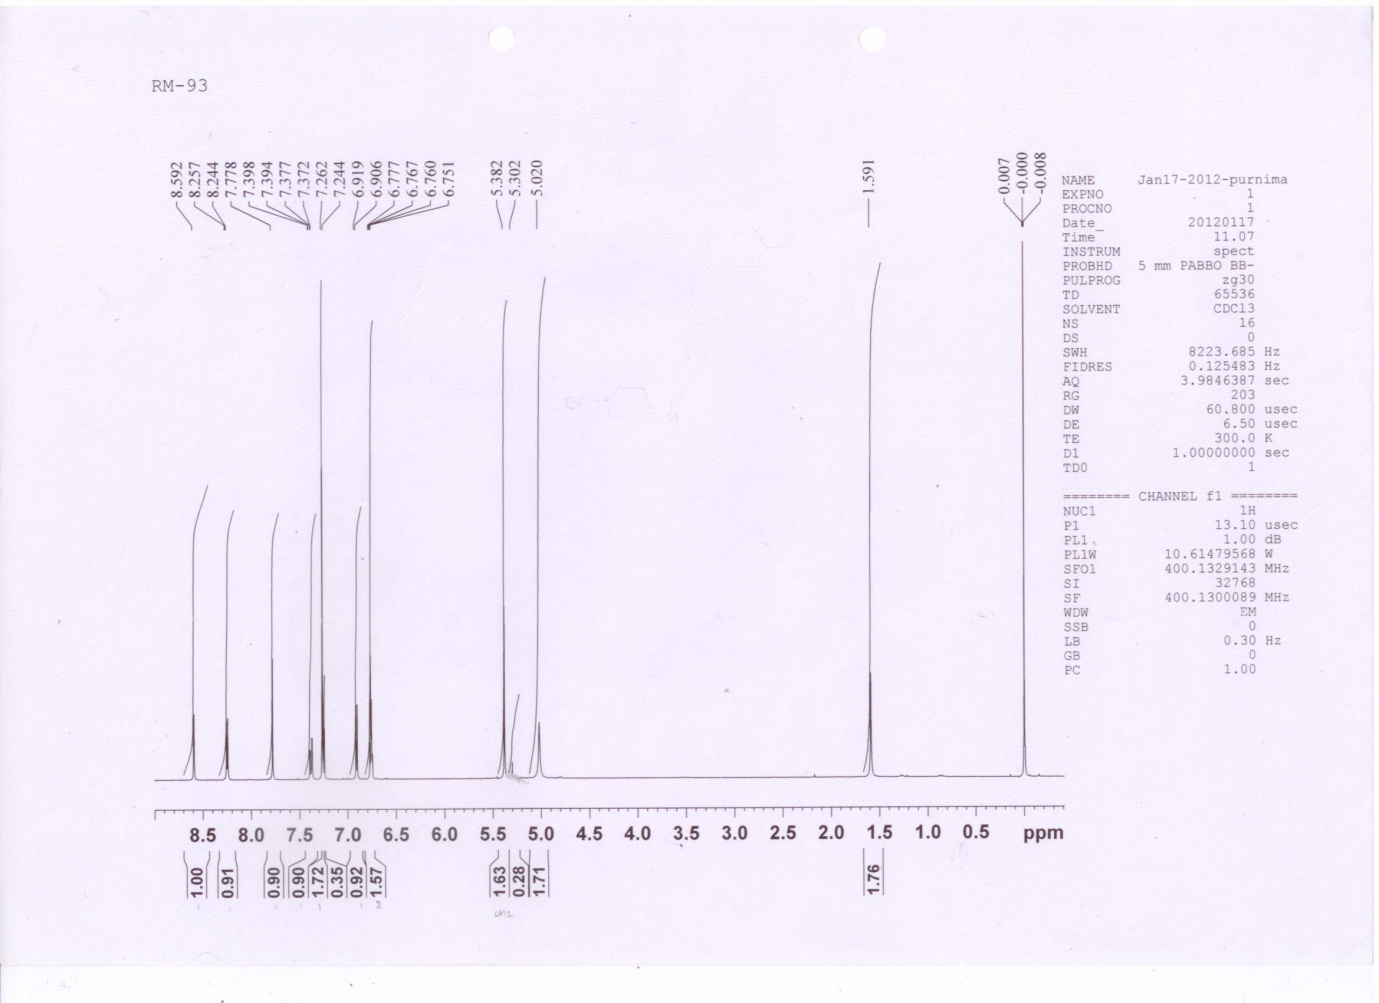
**

**
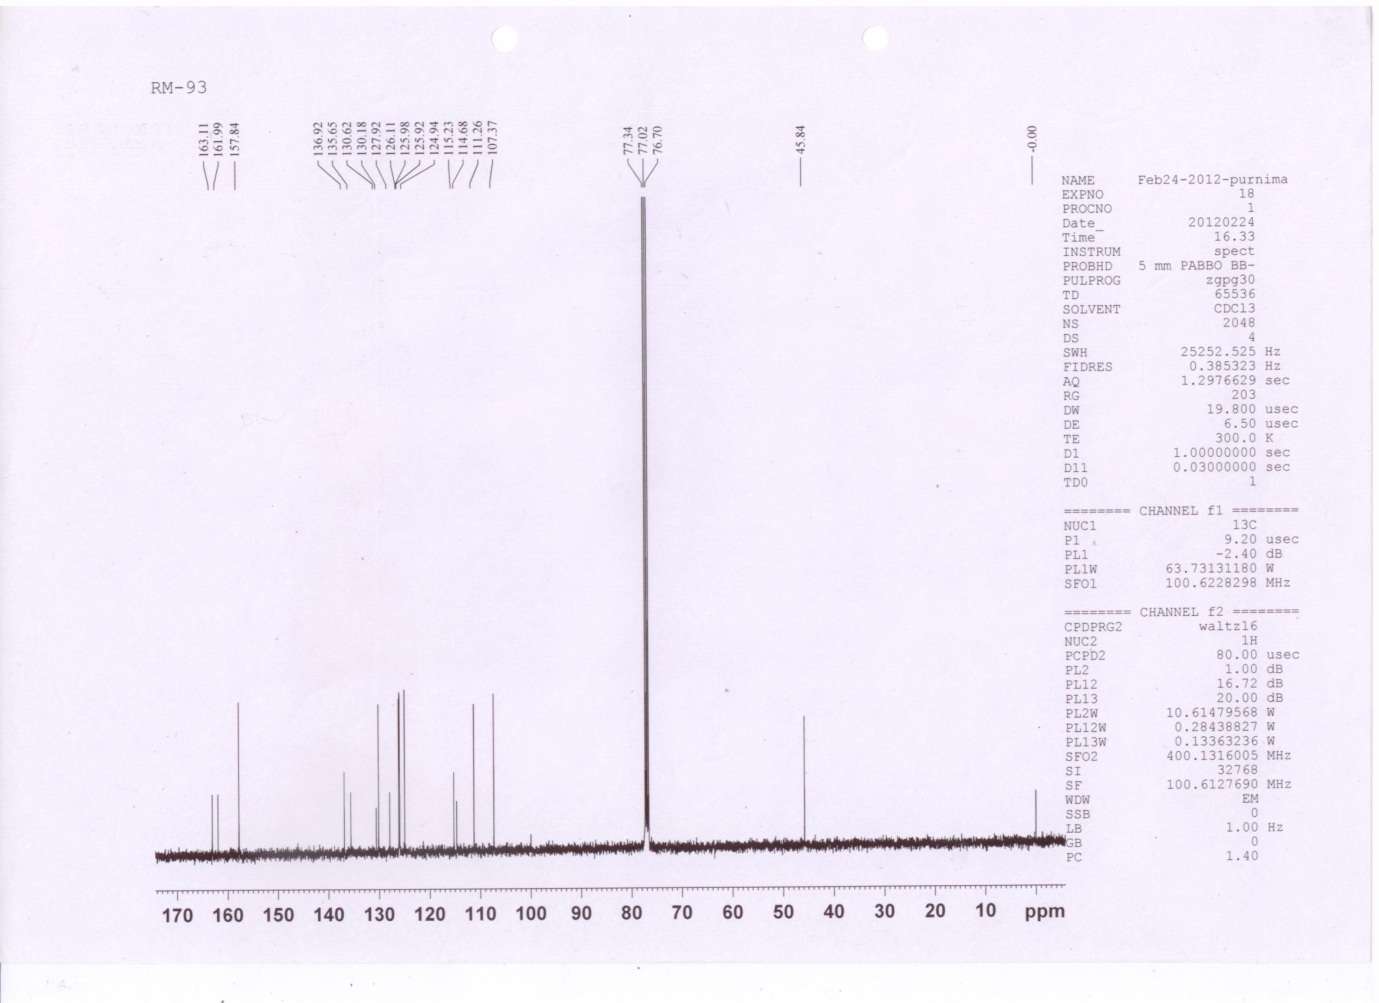

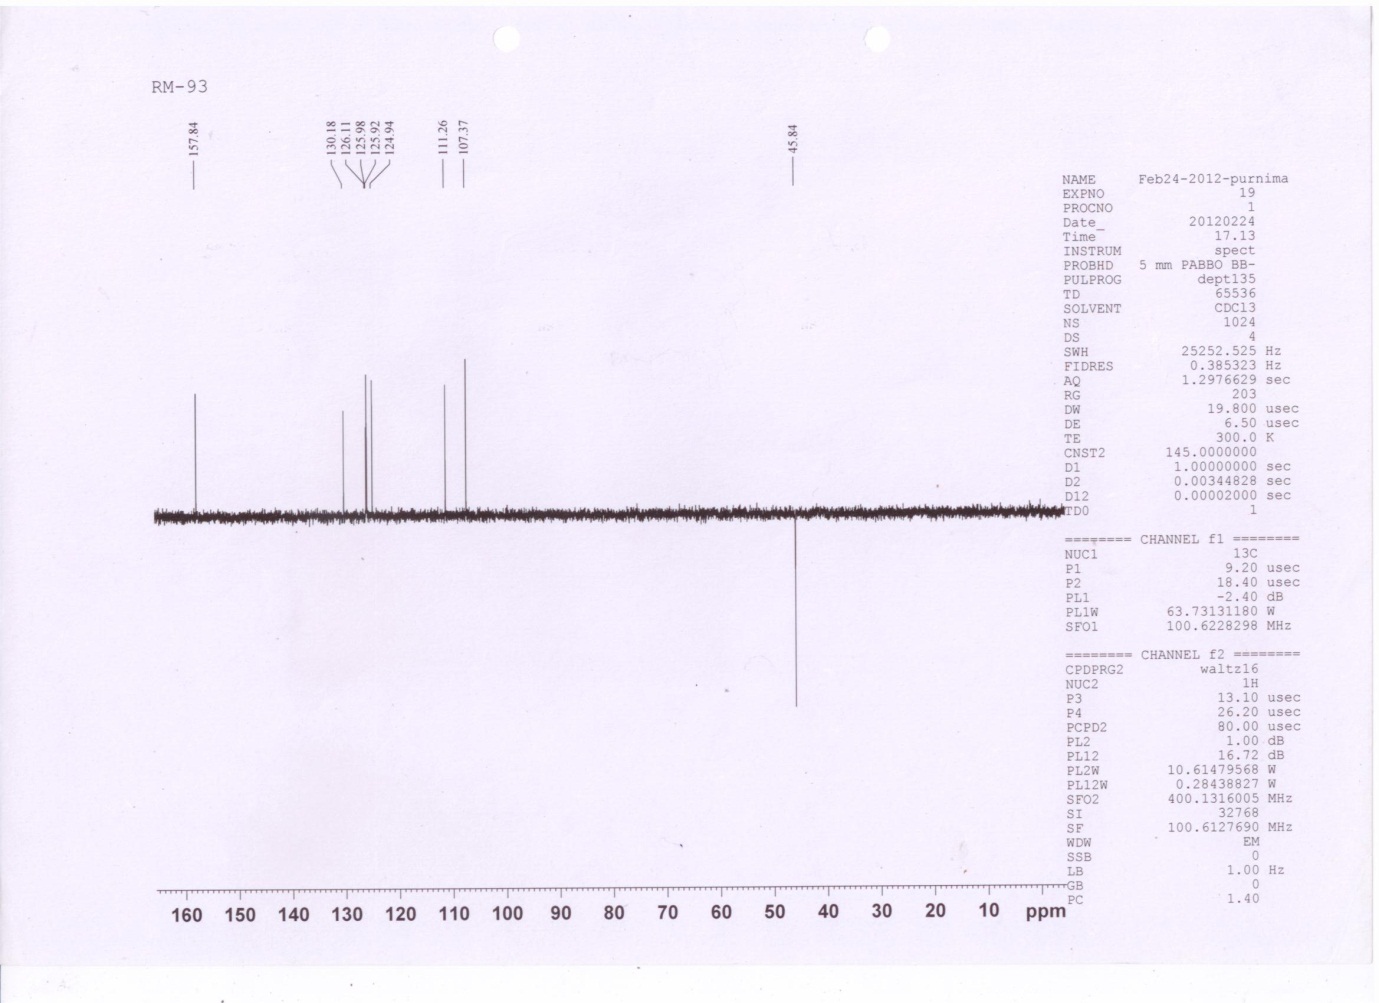
**

S2.16. 1H, 13C and DEPT135 NMR spectra of 2-((3-(2-aminopyrimidin-4-yl)-5-bromo-1H-indol-1-yl)methyl) isoindoline-1,3-dione (**19e**)

**
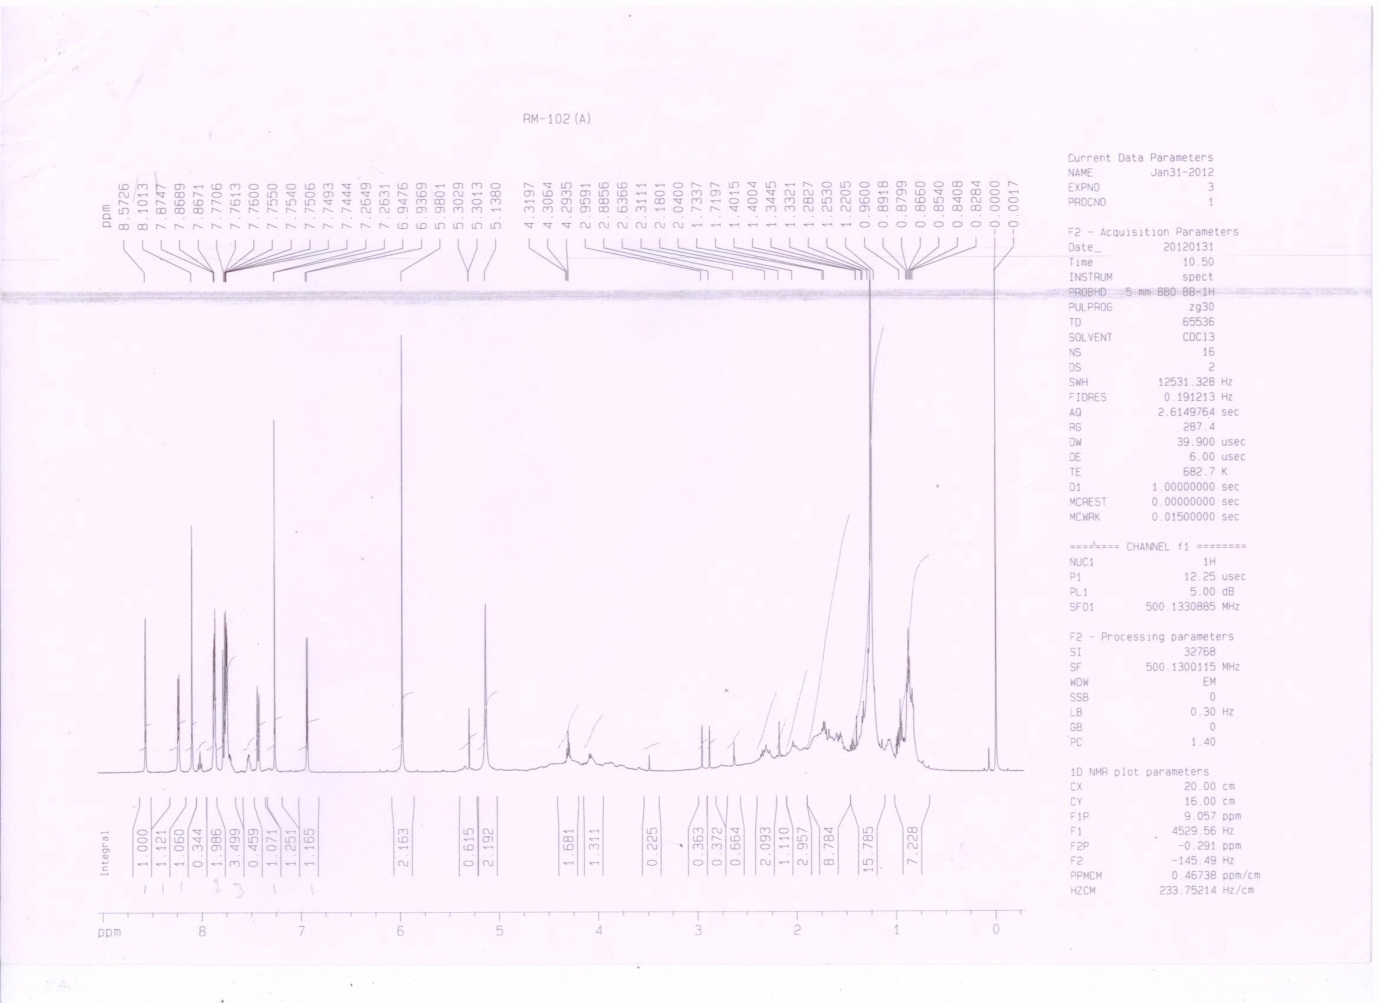
**

**
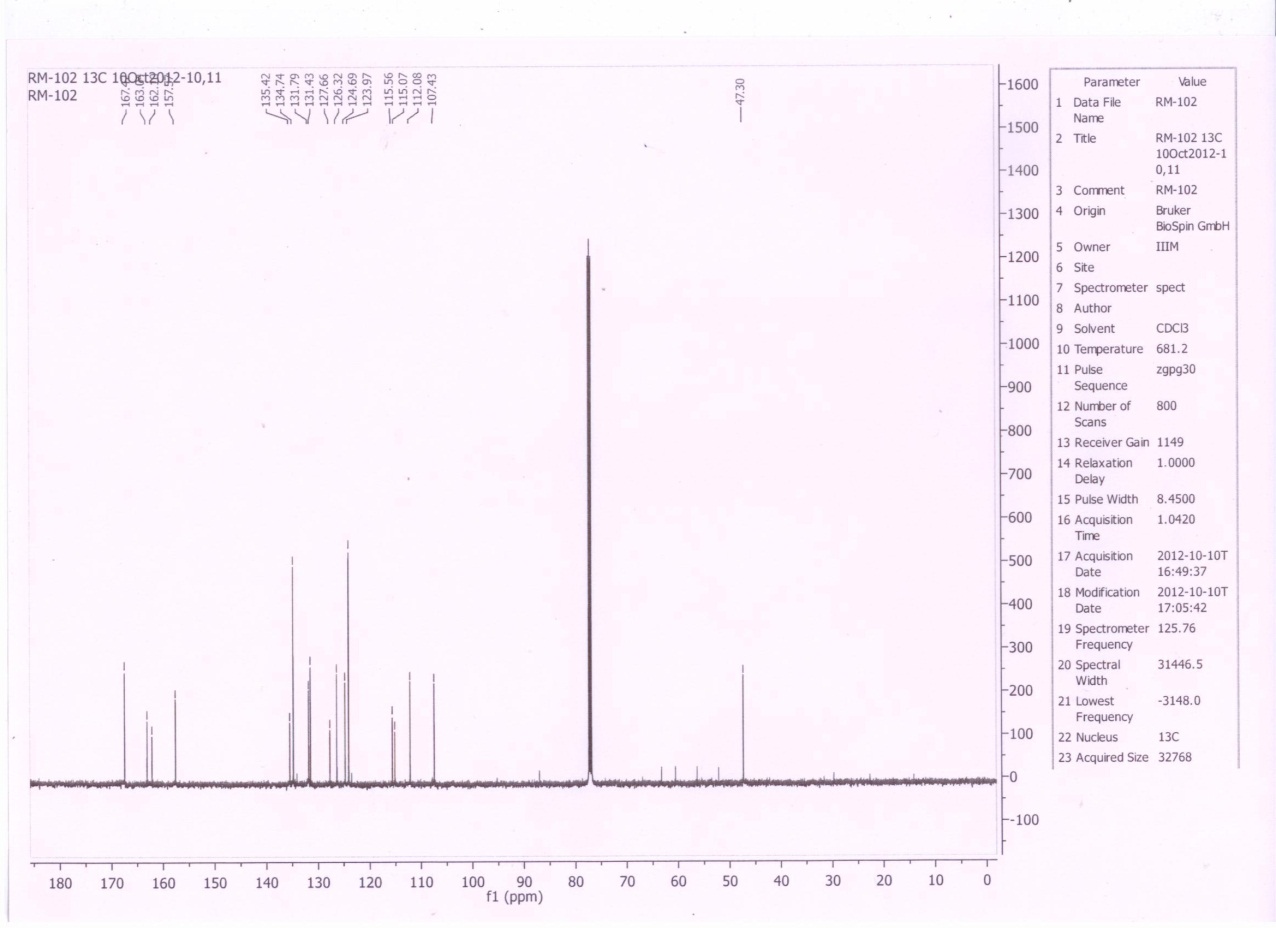
**

**
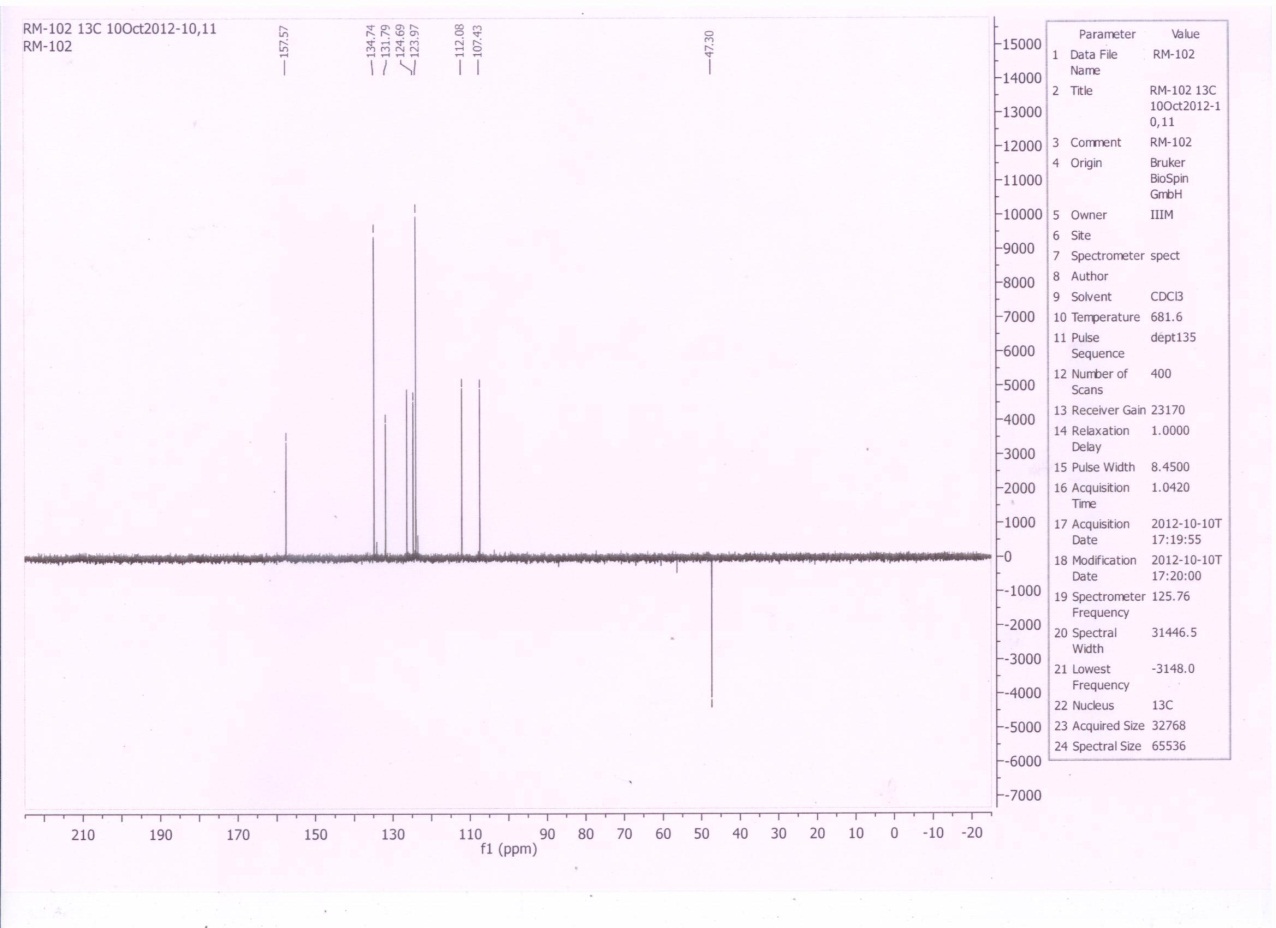
**

S2.17. 1H, 13C and DEPT135 NMR spectra of 4-(1-(anthracen-10-ylmethyl)-1H-indol-3-yl)pyrimidin-2-amine (**19f**)

**
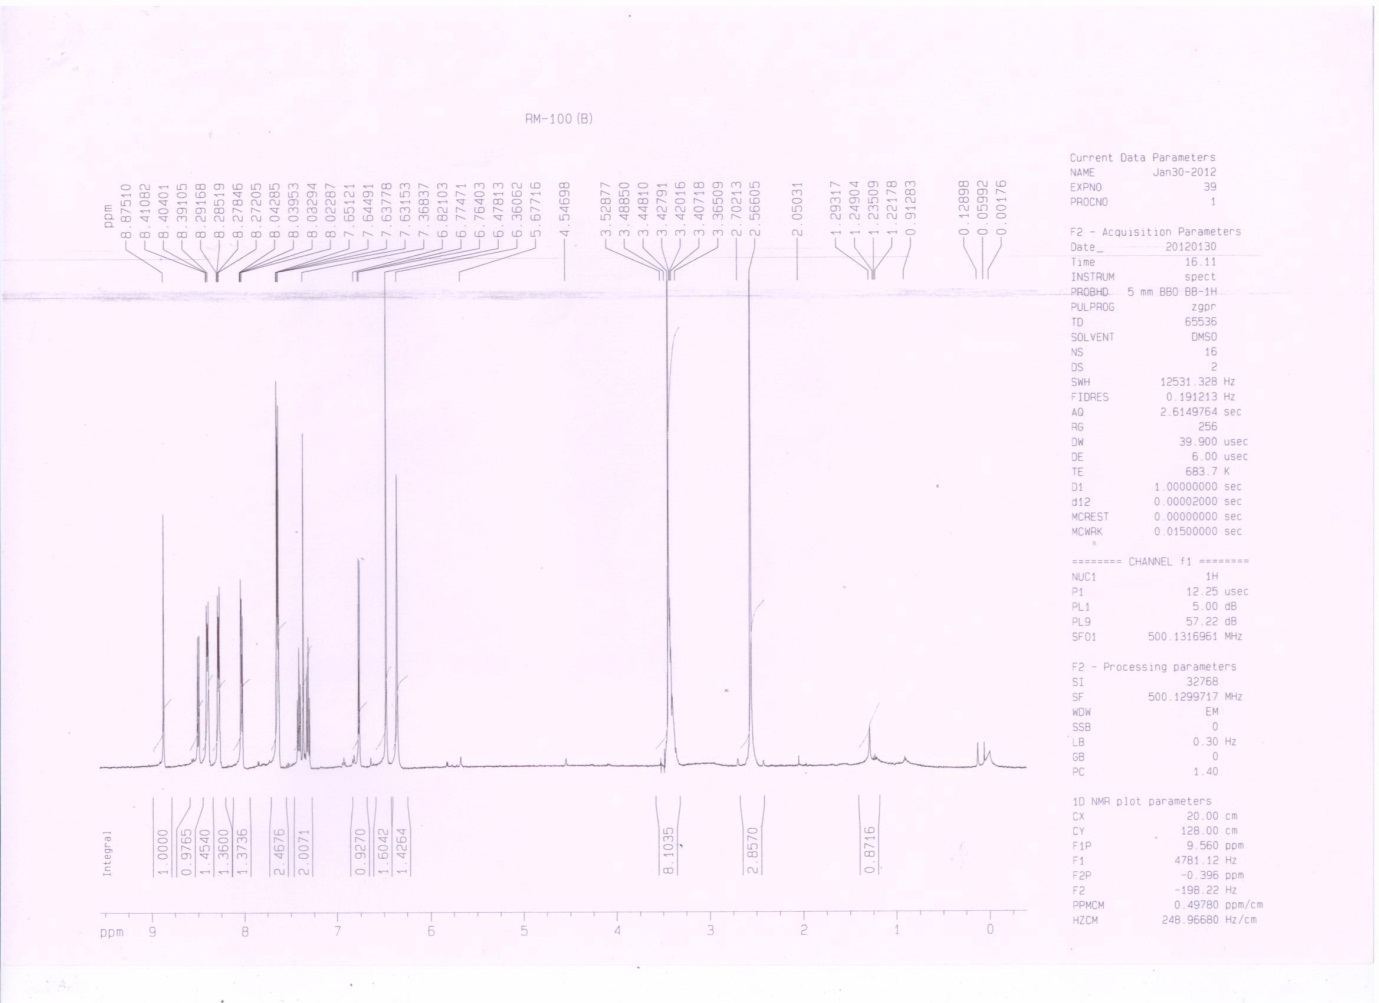
**

**
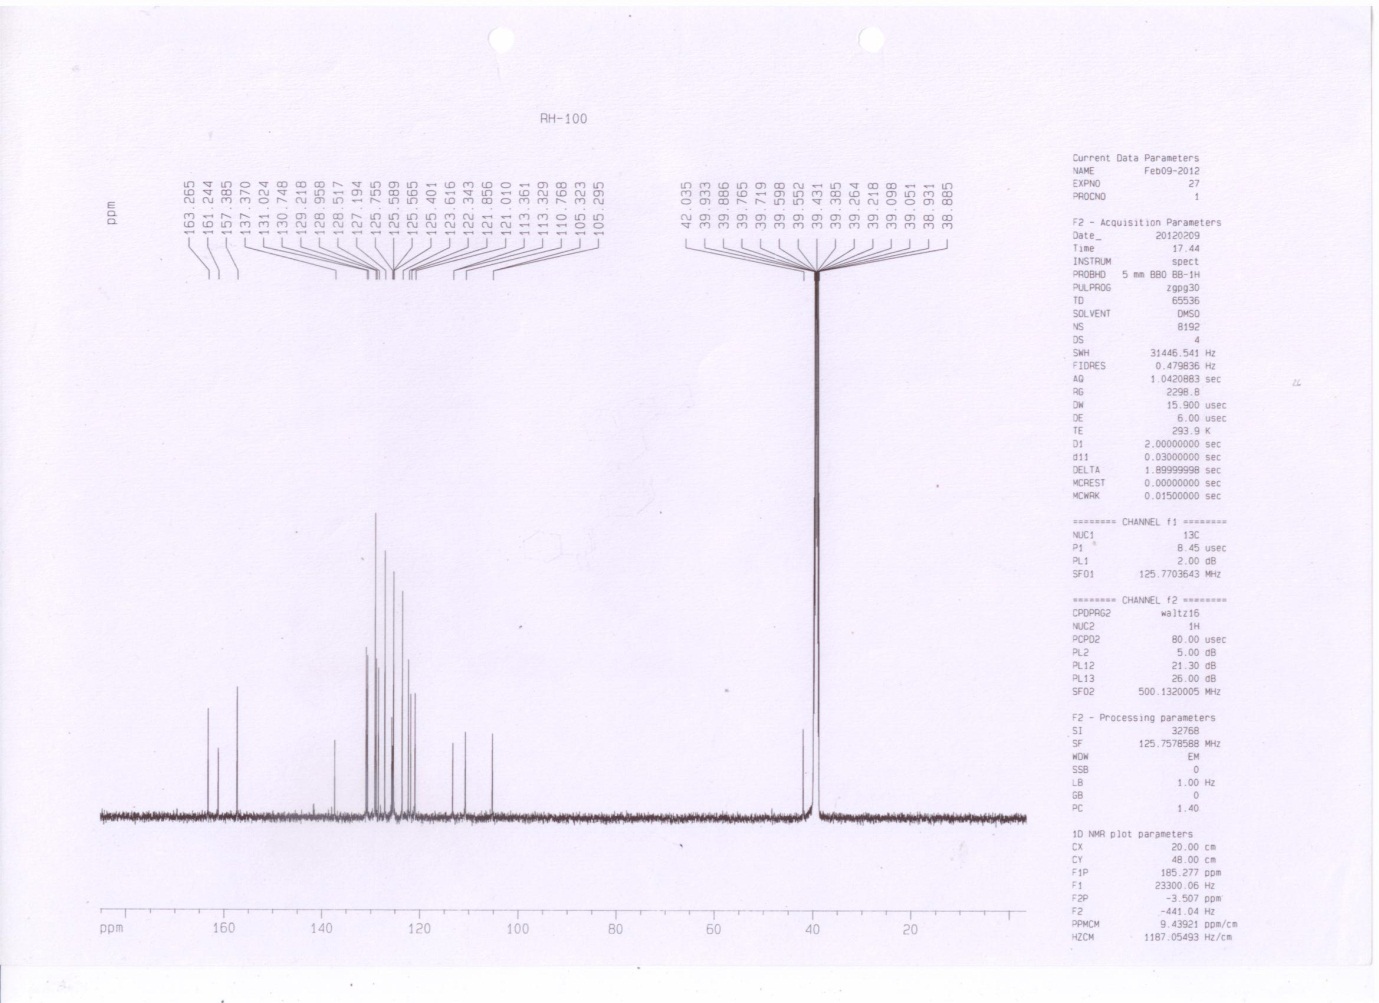
**

**
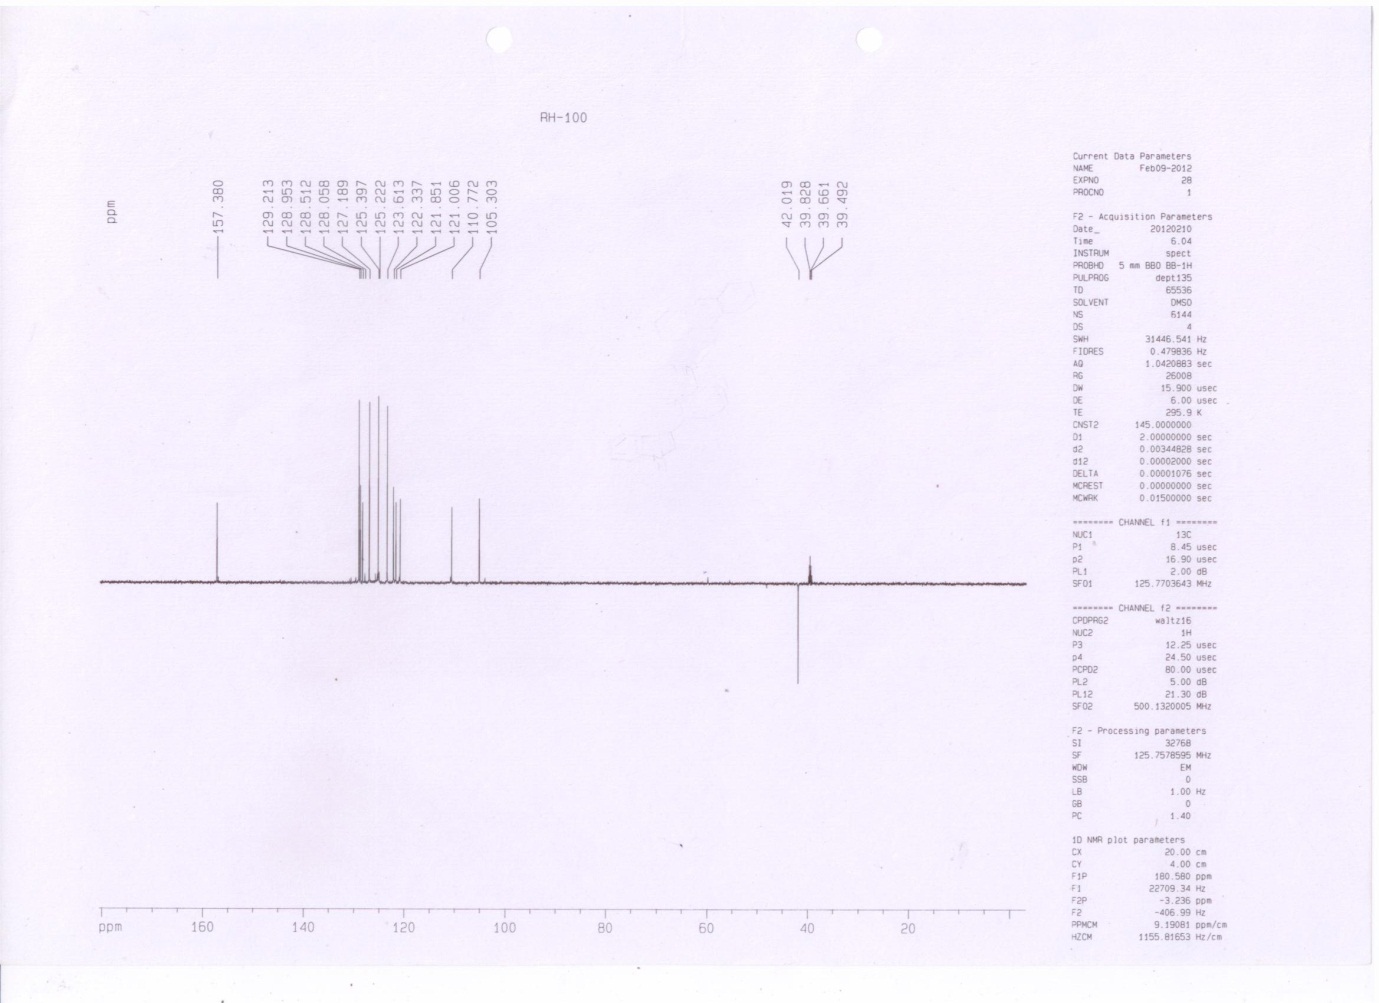
**

S2.18. 1H, 13C and DEPT135 NMR spectra of 4-(1-(anthracen-10-ylmethyl)-5-bromo-1H-indol-3-yl)pyrimidin-2-amine (**19g**)

**
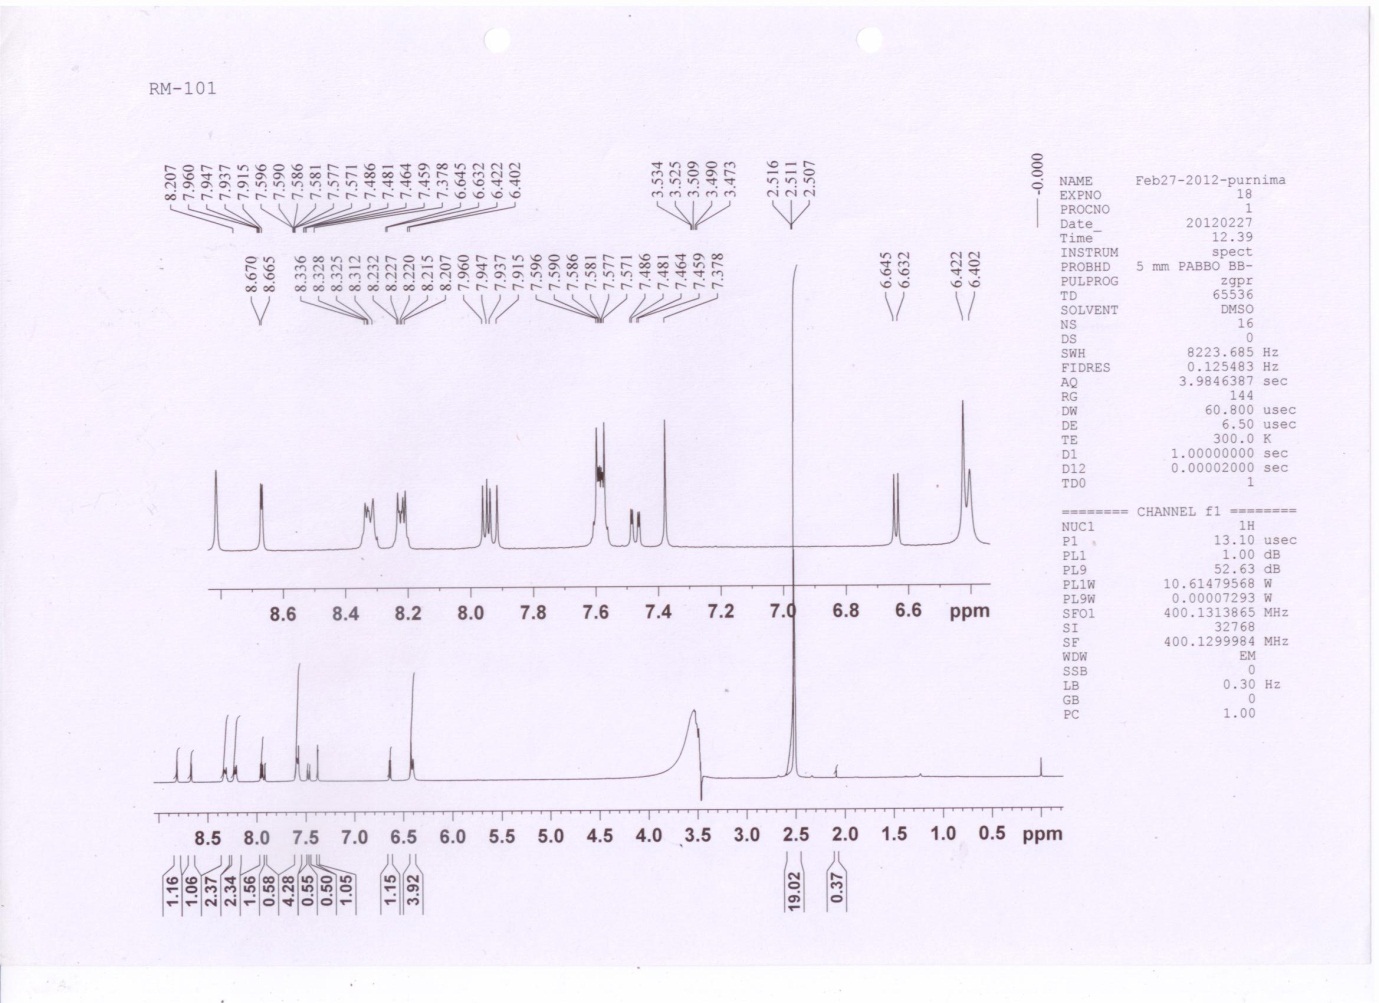
**

**
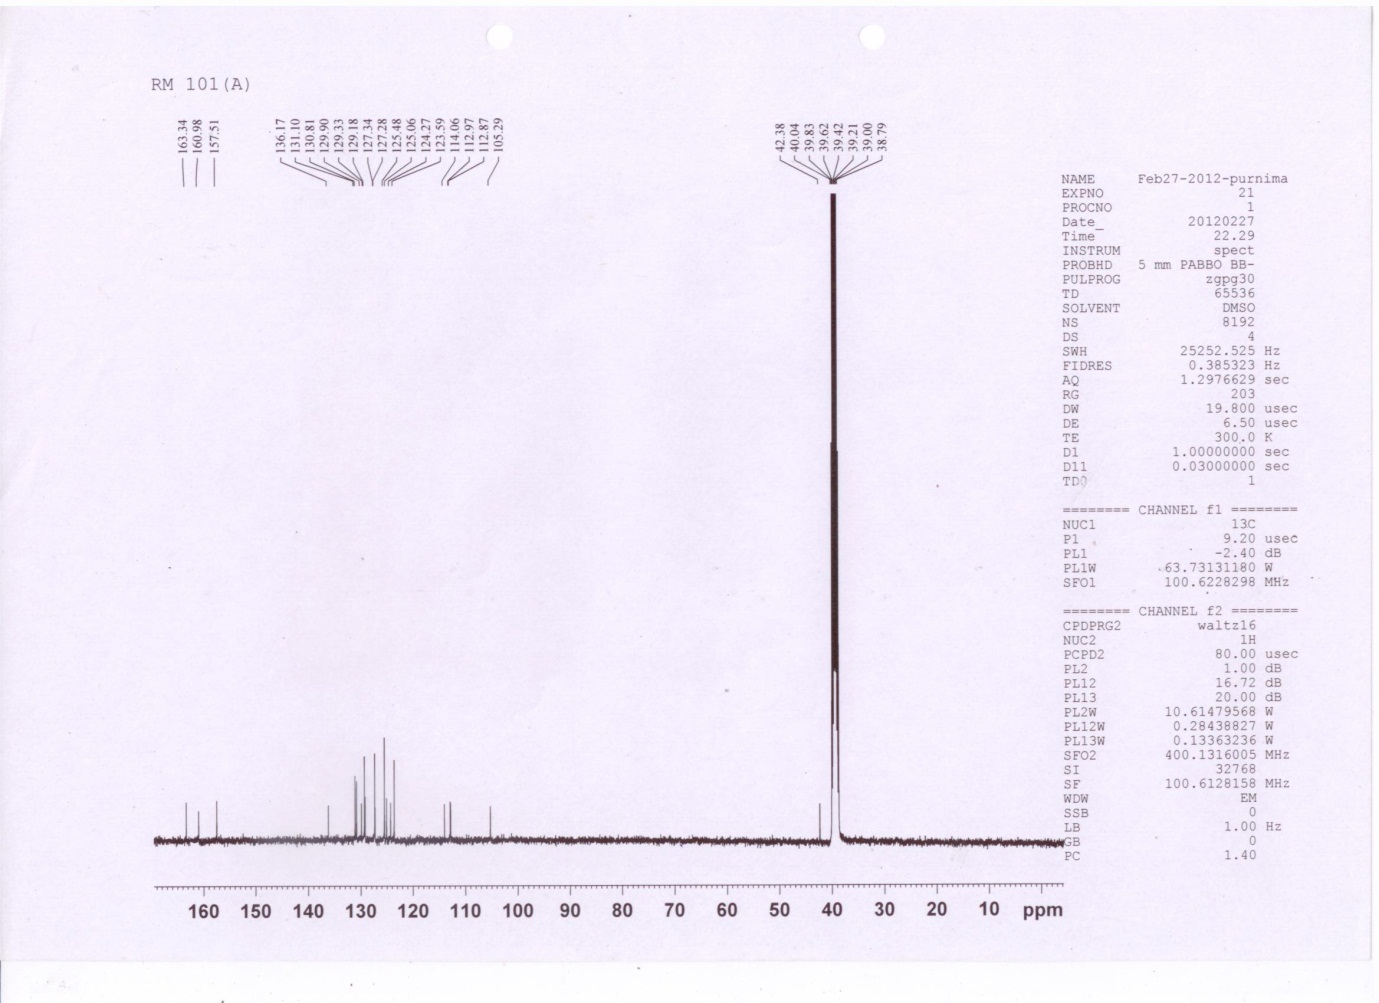
**

**
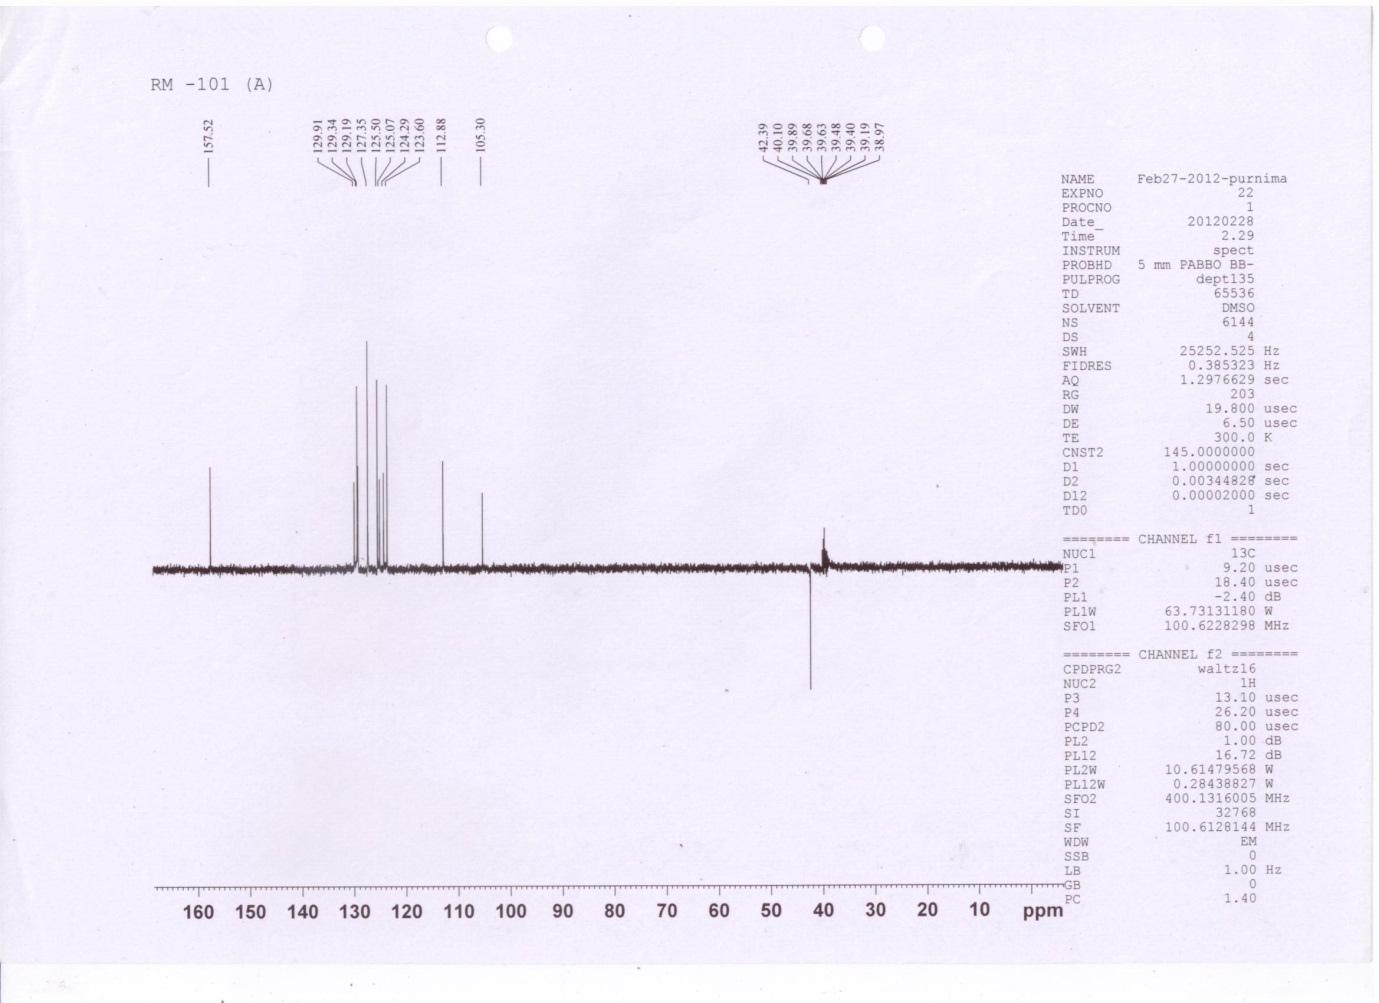
**

S2.19. 1H, 13C and DEPT135 NMR spectra of 2-(1H-indol-3-yl)-2,3-dihydroquinazolin-4(1H)-one (**22a**)

**
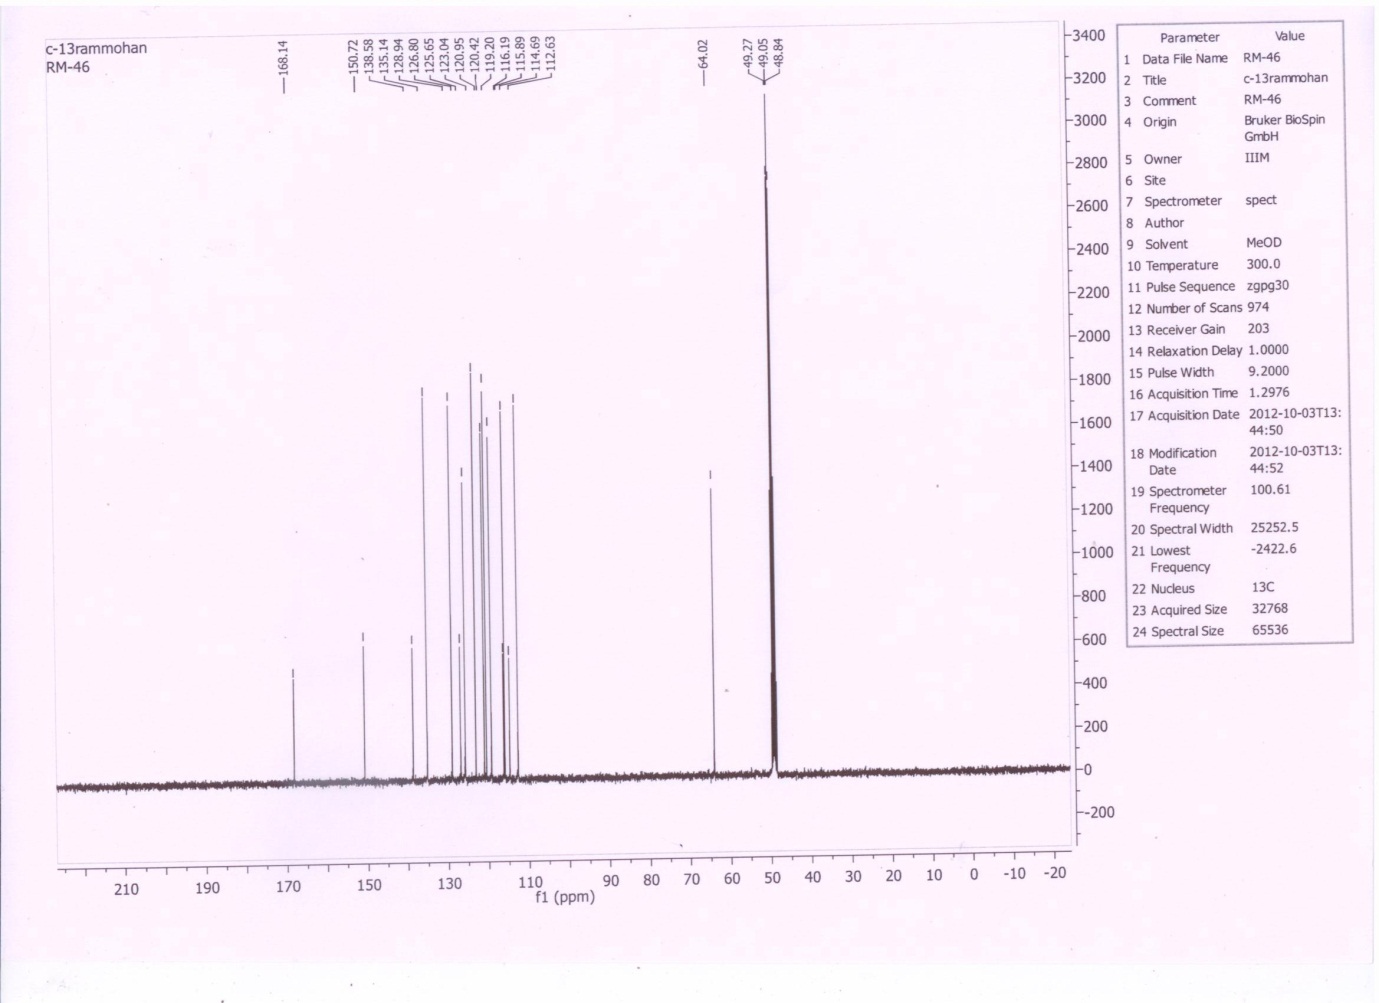
**

**
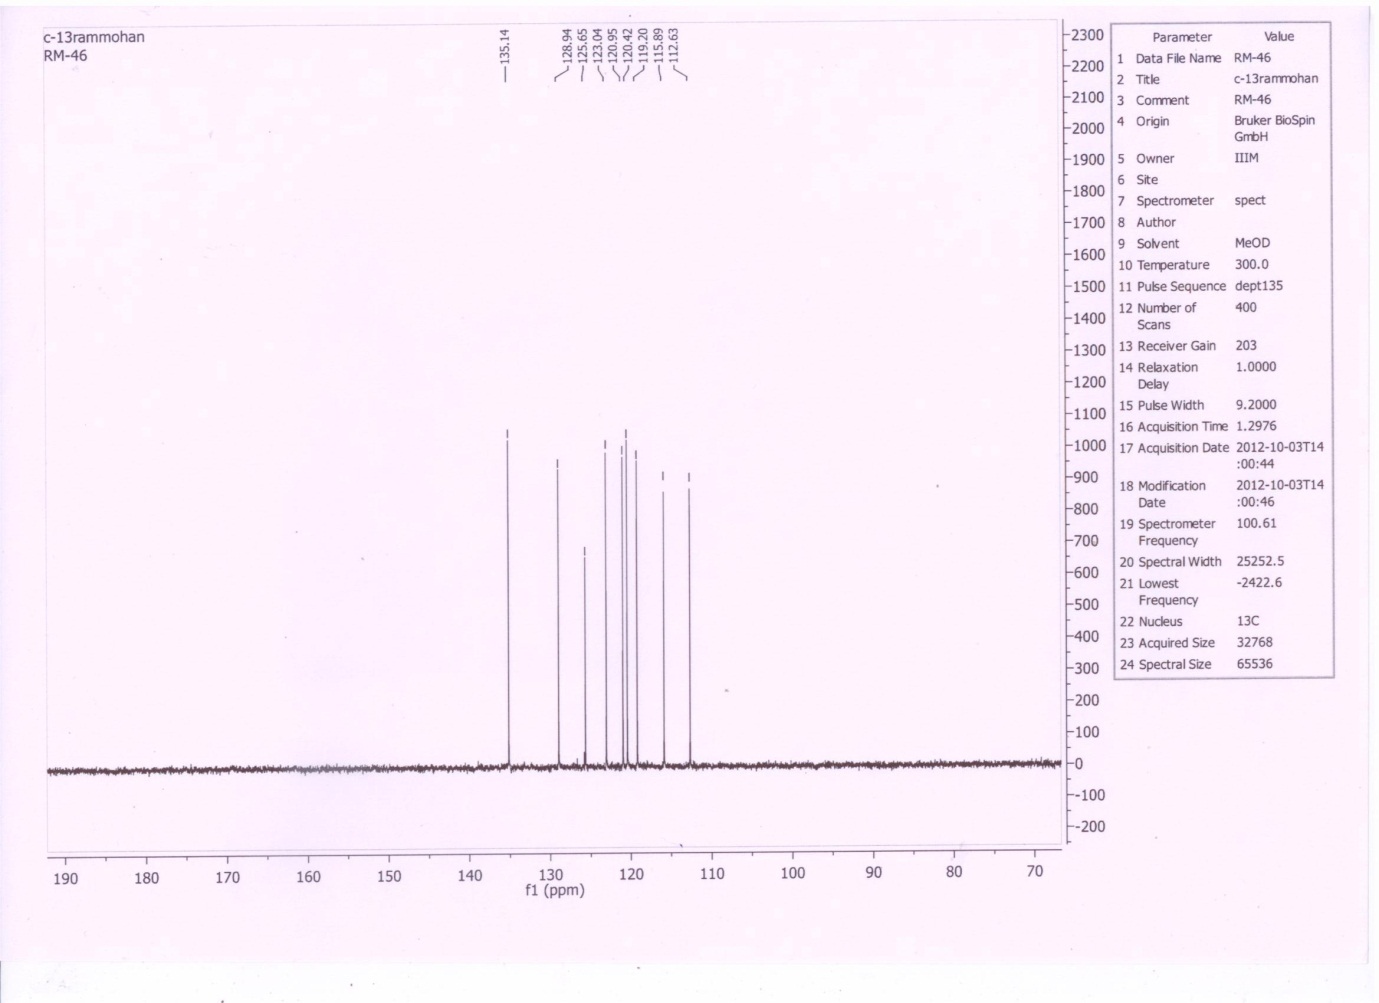
**

S2.20. 1H, 13C and DEPT135 NMR spectra of 2-(5-bromo-1H-indol-3-yl)-2,3-dihydroquinazolin-4(1H)-one (**22b**)

**
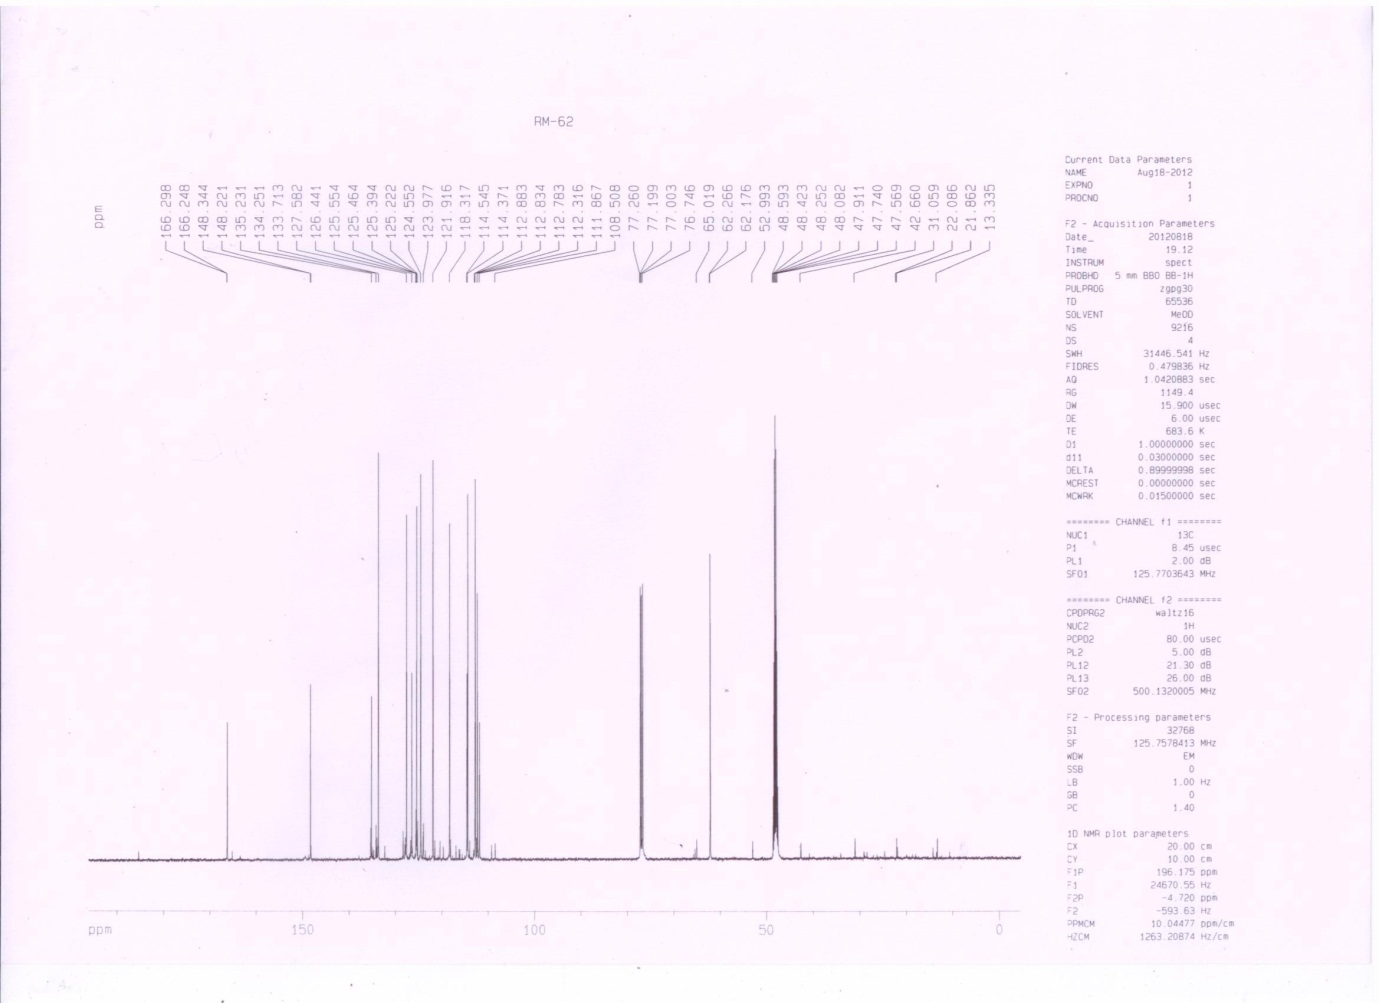
**

**
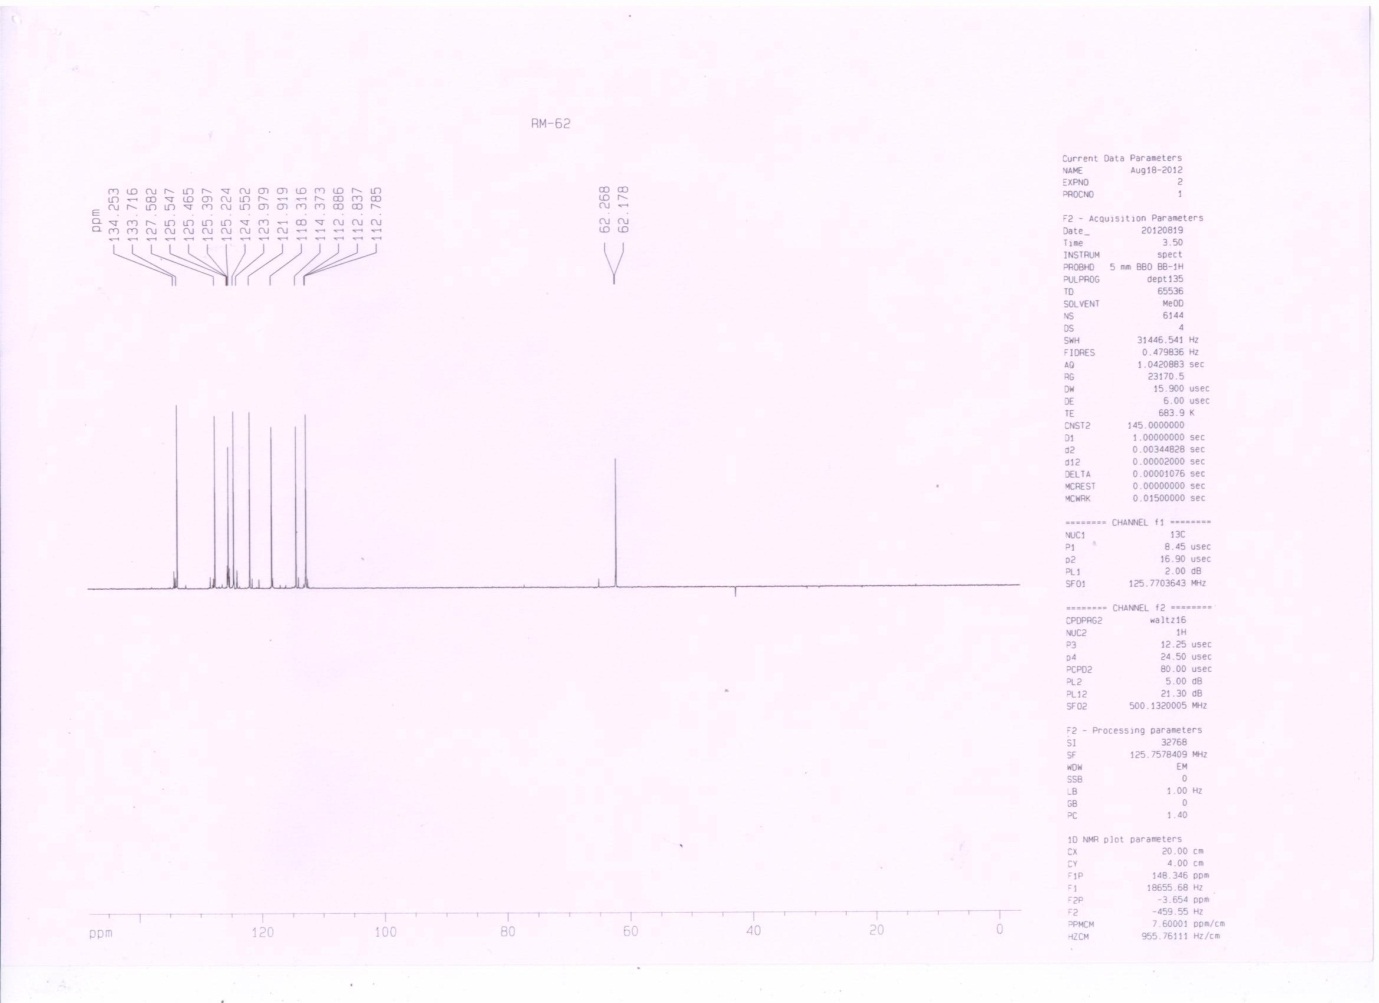
**

S2.21. 1H, 13C and DEPT135 NMR spectra of 2-(5-iodo-1H-indol-3-yl)quinazolin-4(3H)-one (**22c**)

**
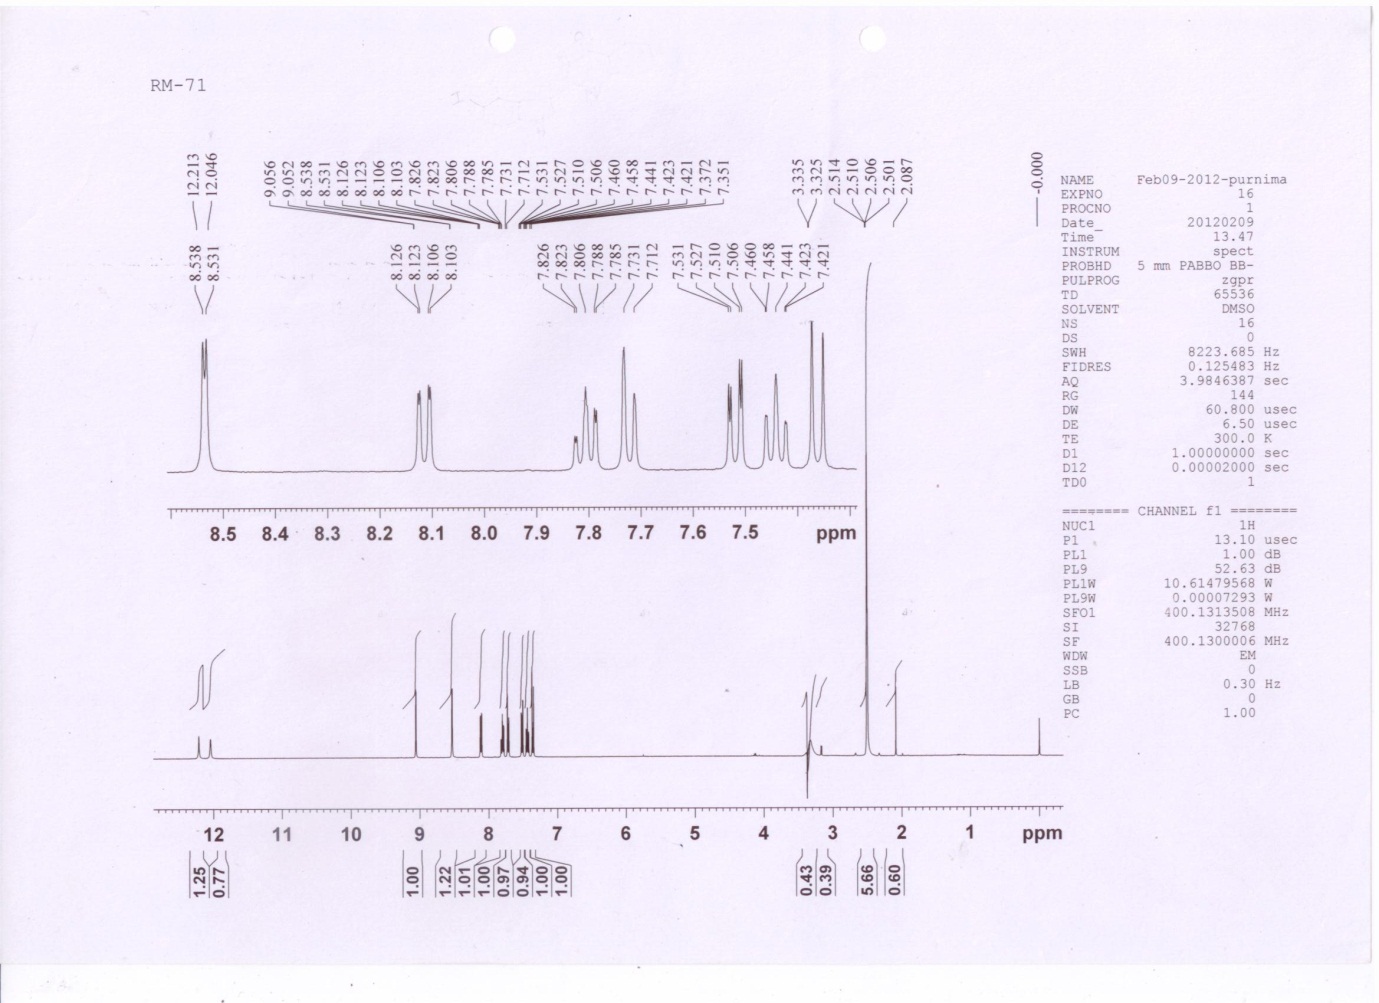
**

**
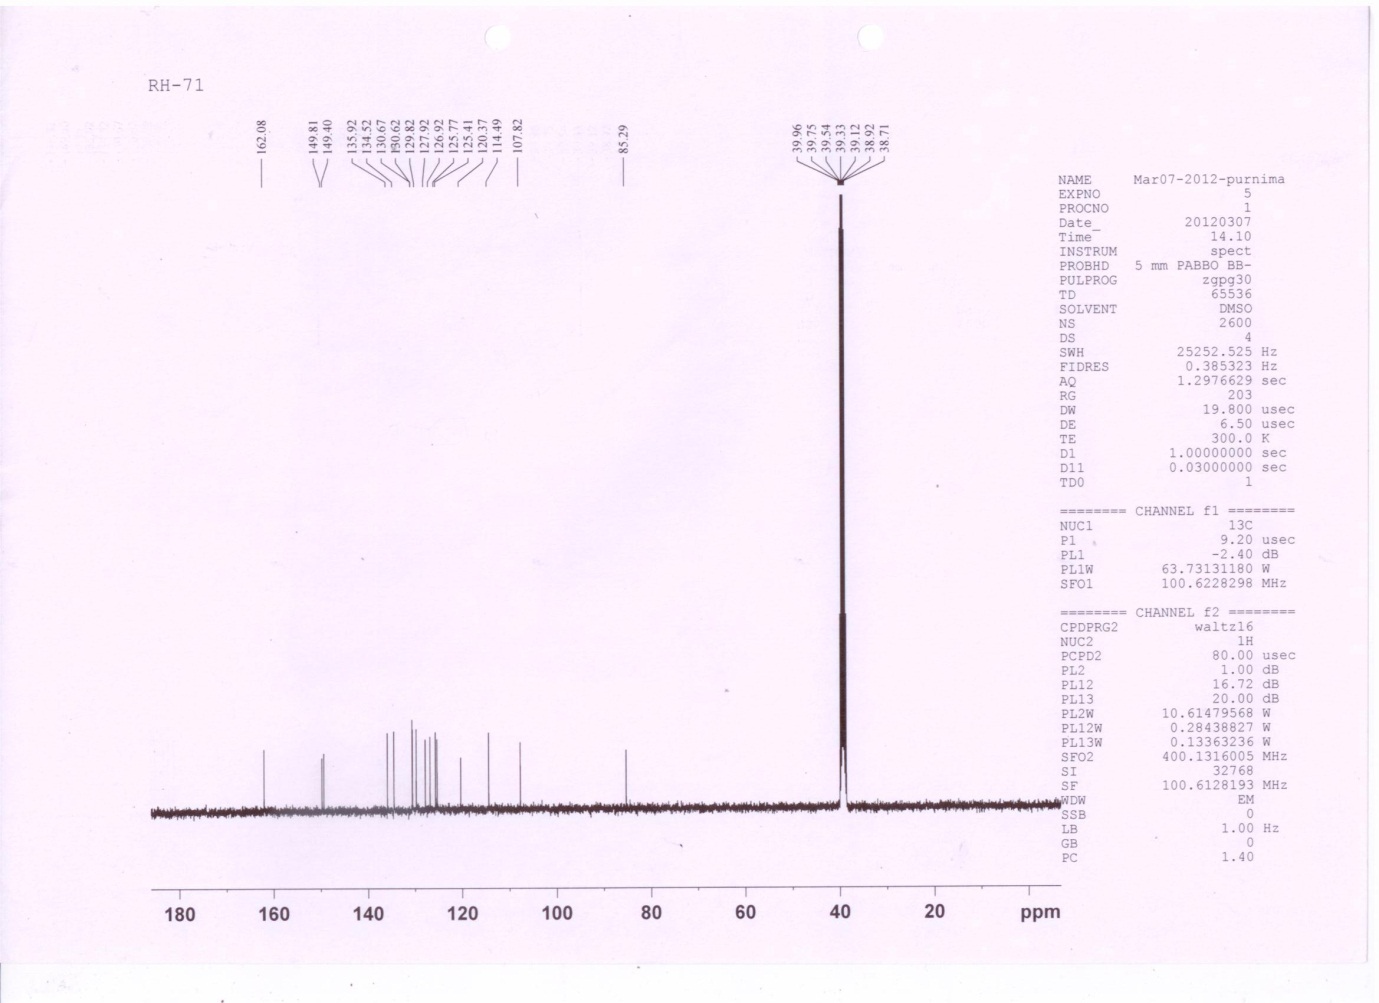
**

**
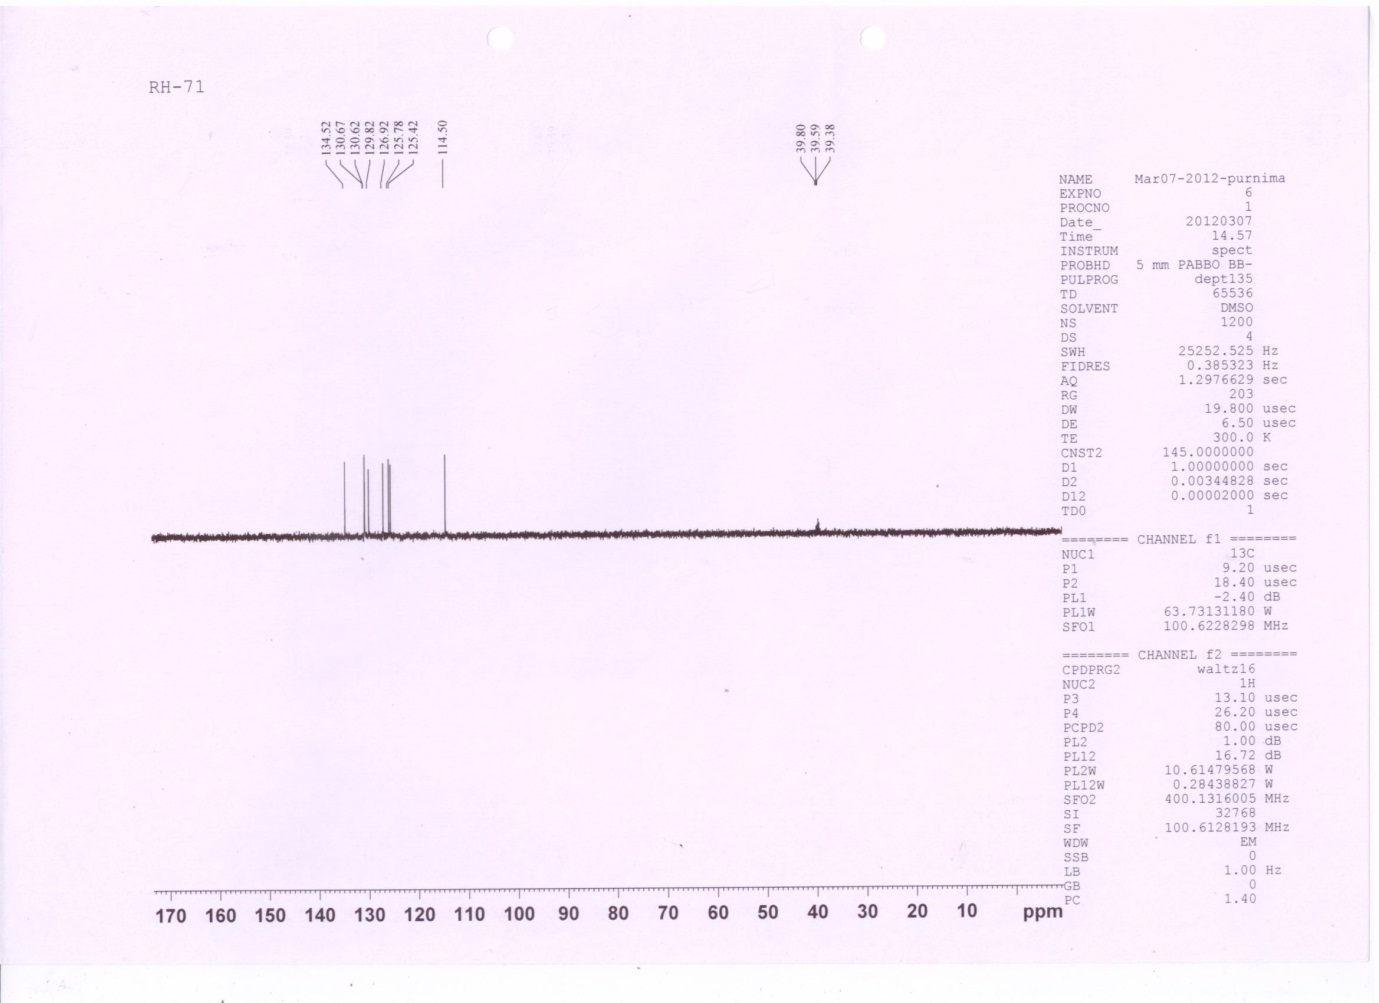
**

**S3. References associated with ESI:**

1. J. A. MacKay, R. L. Bishop and V. H. Rawal, *Org. Lett.*, 2005, 7, 3421-3424.

2. L. Jukić, U. Bratušek, M. Škof, J. Svete and B. Stanovnik, *Chem. Heterocycl. Compounds*, 1996, 32, 1295-1299; Z. Casar, D. Bevk, J. Svete and Stanovnik, B., *Tetrahedron*, 2005, 61, 7508-7519.

3. P. M. Fresneda, P. Molinap and J. A. Bleda, *Tetrahedron*, 2001, 57, 2355-2363.

4. L. H. Franco, E. B. D. K. Joffe, L. Puricelli, M. Tatian, A. M. Seldes and J. A. Palermo, *J. Nat. Prod.*, 1998, 61, 1130-1132.

5. A. M. Seldes, M. F. Brasco, L. H. Franco and J. A. Palermo, *Nat. Prod. Res.*, 2007, 21, 555-563.

6. M. T. Makler and D. J. Hinrichs, *Am. J. Trop. Med. Hyg.*, 1993, 48, 205-210.

7. G. Ma, S. I. Khan, M. R. Jacob, B. L. Tekwani, Z. Li, D. S. Pasco, L. A. Walker and I. A. Khan, *Antimicrob. Agents Chemother.*, 2004, 48, 4450-4452; J. Mikus and D. Steverding, *Parasitol. Int.*, 2000, 48, 265-269.

8. NCCLS, National Committee on Clinical Laboratory Standards, 1997, p. 9; NCCLS, National Committee on Clinical Laboratory Standards, 2000, p. 2; NCCLS, National Committee on Clinical Laboratory Standards, 2000, p. 26.

9. S. G. Franzblau, R. S. Witzig, J. C. McLaughlin, P. Torres, G. Madico, A. Hernandez, M. T. Degnan, M. B. Cook, V. K. Quenzer, R. M. Ferguson and R. H. Gilman, *J. Clin. Microbiol.*, 1998, 36, 362-366.

10. J. Mustafa, S. I. Khan, G. Ma, L. A. Walker and I. A. Khan, *Lipids*, 2004, 39, 167-172.
